# Supplementary material for: Electrochemical synthesis of 3a-bromofuranoindolines and 3a-bromopyrroloindolines mediated by MgBr 2
Source: Royal Society of Chemistry journal article supplement (doi:10.1039/c9cc09276e), 2020-01-01
Supplement: c9cc09276e1.pdf [file c9cc09276e1.pdf]

# **Electrochemical Synthesis of 3a-Bromofuranoindolines and 3a-Bromopyrroloindolines Mediated by MgBr<sub>2</sub>**

Ju Wu, Hussein Abou-Hamdan, Régis Guillot, Cyrille Kouklovsky, Guillaume  
Vincent\*

Institut de Chimie Moléculaire et des Matériaux d'Orsay (ICMMO, UMR 8182)

Univ. Paris Sud, CNRS, Université Paris-Saclay

15, rue Georges Clemenceau, 91405 Orsay, Cedex, France.

Guillaume.vincent@u-psud.fr

## **Supporting Information**

### **Table of Contents**

|                                                                  |            |
|------------------------------------------------------------------|------------|
| <b>1. General Information</b>                                    | <b>S2</b>  |
| <b>2. Cyclic voltammetry</b>                                     | <b>S3</b>  |
| <b>3. General experimental procedures</b>                        | <b>S5</b>  |
| <b>4. Optimization study</b>                                     | <b>S7</b>  |
| <b>5. Experimental details and characterization of compounds</b> | <b>S8</b>  |
| <b>6. <sup>1</sup>H and <sup>13</sup>C NMR spectra.</b>          | <b>S26</b> |
| <b>7. X-ray analysis</b>                                         | <b>S54</b> |

## 1. General Information

Unless otherwise stated, all reactions were carried out under air atmosphere. Dichloromethane was distilled under argon over  $\text{CaH}_2$ . Unless otherwise noted, all reagent-grade chemicals and other solvents were obtained from commercial suppliers and were used as received. Reactions were visualized under UV (254 nm) and/or by staining with Phospho Molybdic Acid or  $\text{KMnO}_4$  solution followed by heating. Flash chromatography were performed on silica gel (Chromagel Si60ACC [70-200  $\mu\text{m}$ ]) as stationary phase.  $^1\text{H}$  NMR spectra were recorded on Bruker AC250 (250 MHz), Bruker DRX300 (300 MHz), Bruker AM360 (360 MHz) and Bruker 400 (400 MHz) instruments; chemical shifts ( $\delta$ ) are given in parts per million with respect to the residual protonated solvent ( $\delta = 7.26$  ppm for  $\text{CDCl}_3$ ,  $\delta = 2.50$  ppm for  $d_6$ -DMSO), which served as an internal standard.  $^{13}\text{C}$  NMR spectra were recorded on Bruker AC250 (62 MHz), DRX300 (75 MHz), AM360 (90 MHz) and chemical shifts are expressed with respect to the deuterated solvent ( $\delta = 77.16$  ppm for  $\text{CDCl}_3$ ,  $\delta = 39.52$  ppm for  $d_6$ -DMSO). Coupling constant(s) in hertz (Hz) were measured from one-dimensional spectra and multiplicities were abbreviated as following: br (broad), s (singlet), d (doublet), t (triplet), q (quadruplet), m (multiplet). High resolution mass spectra (HRMS) were recorded using Electrospray Ionization (ESI) method with a Bruker Daltonics MicrOTOF-Q instrument. Electrochemical experiments were performed with ElectraSyn 2.0 (IKA).

## 2. Cyclic voltammetry

Cyclic voltammetry were performed with AUTOLAB potentiostat/galvanostat PGSTAT302N. A glassy carbon disc (diameter 3 mm) working electrode, a platinum wire counter electrode and a saturated calomel electrode (SCE) as reference electrode were used at a scan rate of 100 mV/s. The experiments were conducted in a 20 mL vial without stirring in CH<sub>3</sub>CN (10 mL) or CH<sub>3</sub>CN/H<sub>2</sub>O (8.0 mL/2.0 mL) with **5c** (0.05 mmol) and/or MgBr<sub>2</sub> (0.025 mmol) and nBu<sub>4</sub>NBF<sub>4</sub> (1 mmol).

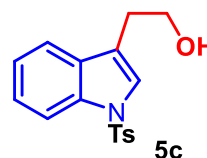

**Figure S1:** Cyclic voltammetry of *N*-Ts tryptophol **5c** and/or MgBr<sub>2</sub> in the [0-1.4 V] range vs SCE.

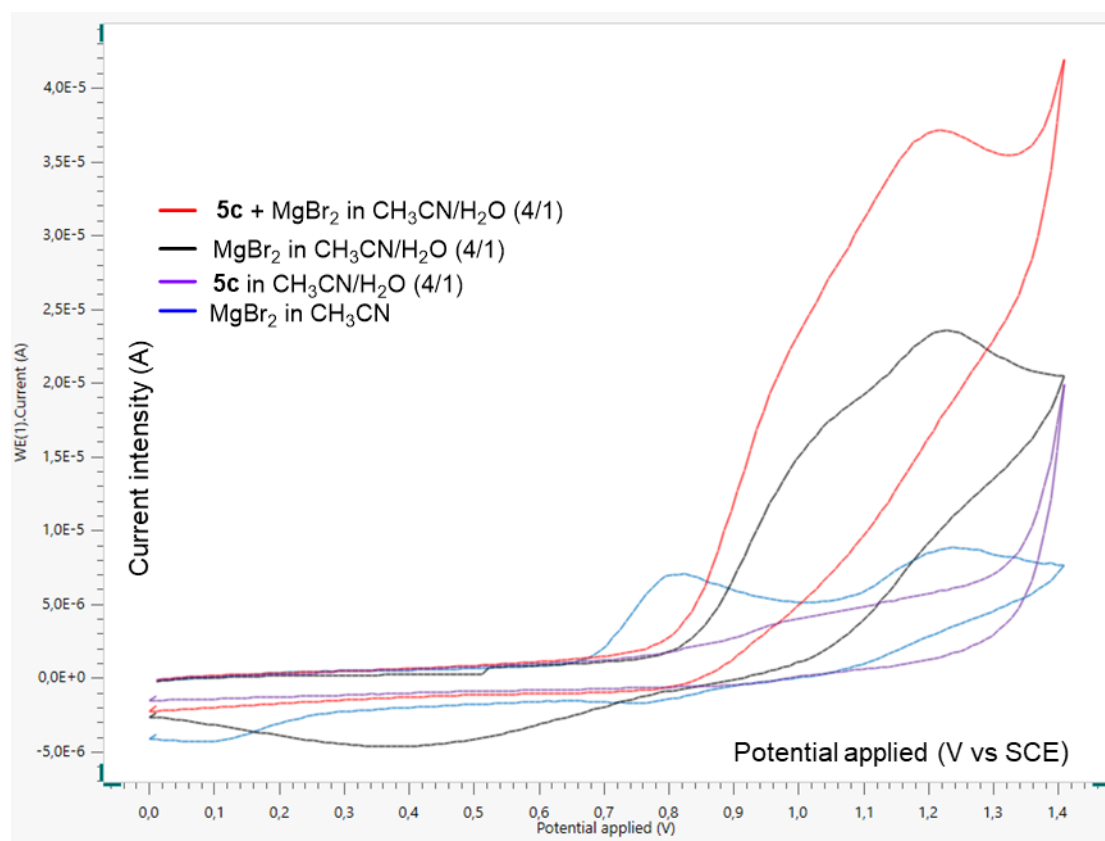

**Figure S2:** Cyclic voltammetry of *N*-Ts tryptophol **5c** and/or  $\text{MgBr}_2$  in the  $[-2.5 \text{ to } 1.5 \text{ V}]$  range vs SCE.

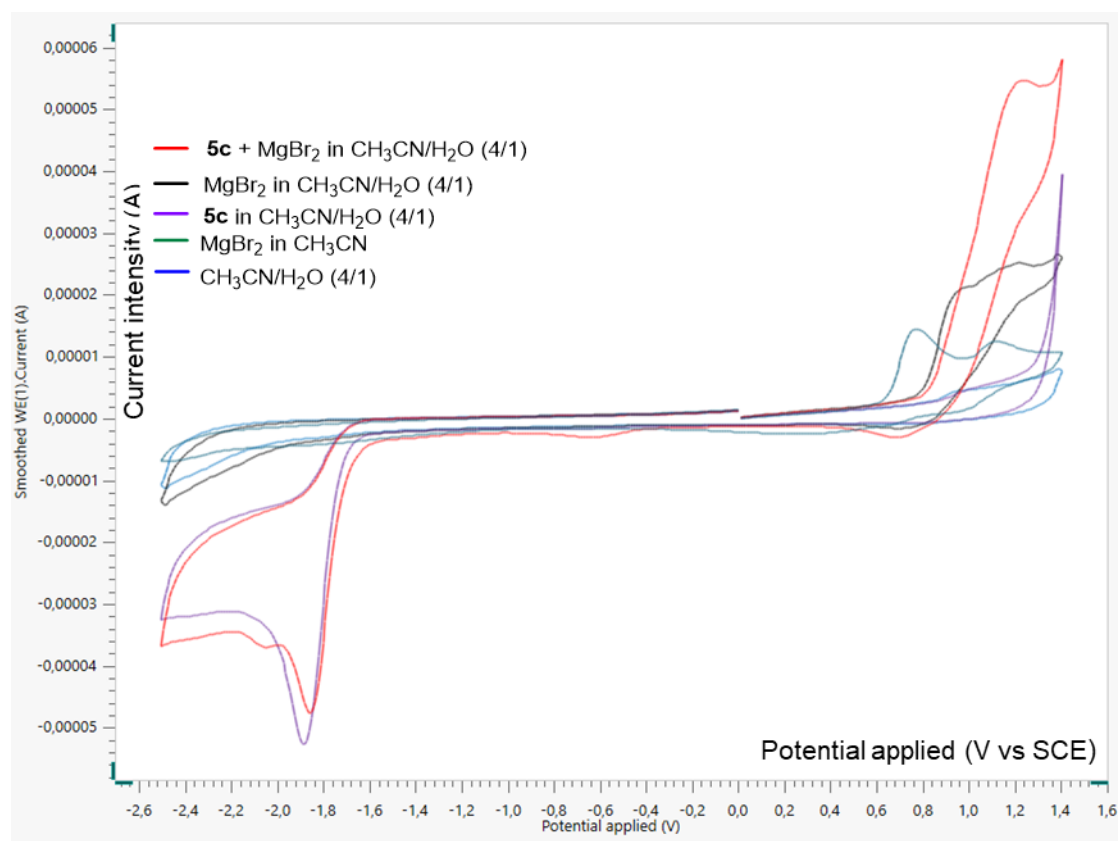

### 3. General experimental procedures

#### *Electrolysis general informations*

Electrochemical reactions were performed with ElectraSyn 2.0 package (IKA) using the constant current or constant voltage modes. The reactions were conducted in a 10 mL vial for 5 mL of solvent (20 mL vial for 15 mL of solvent) with a stir bar and a graphite-SK-50 (5.0 x 0.8 x 0.2 cm) working electrode (anode) and a platinum-plated (5.0 x 0.8 x 0.2 cm) counter-electrode (cathode) with a distance of 0.6 cm between the two electrodes.

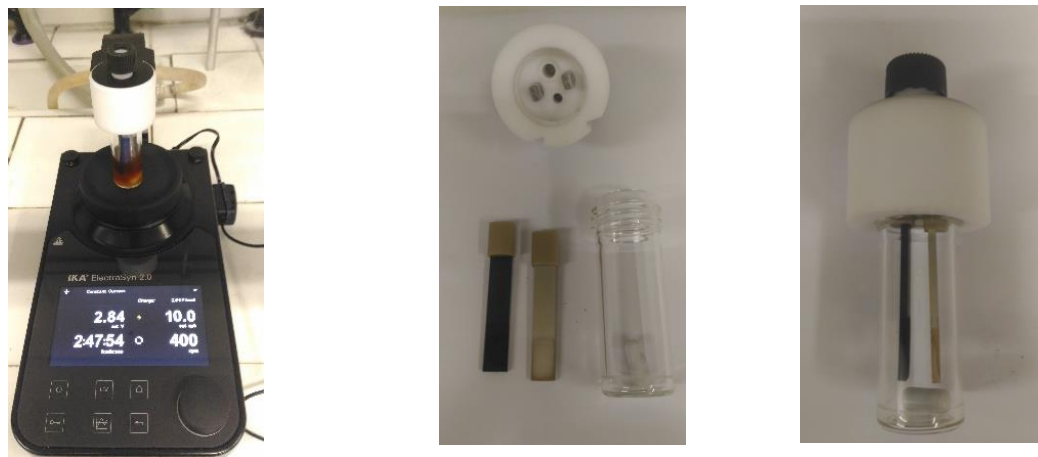

Starting tryptophol, tryptamine and tryptophan derivatives were prepared according to known procedures.<sup>1</sup>

#### *General Procedure A for the bromocyclization of tryptophol derivatives 1, tryptamine and tryptophan derivatives 3.*

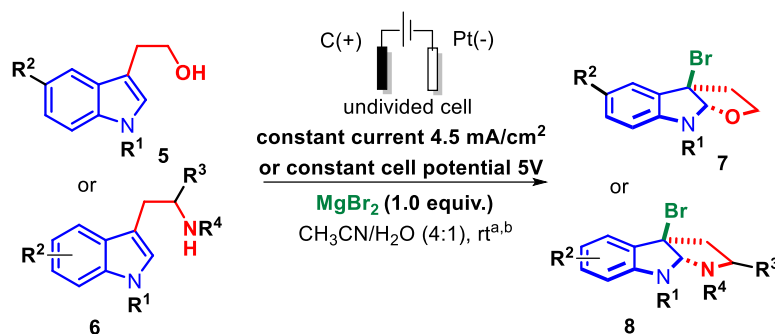

To a 10 mL vial with a stir bar were successively added a tryptophol derivative **5**, tryptamine or tryptophan derivative **6** (0.2 mmol),  $\text{MgBr}_2$  (37 mg, 0.2 mmol, 1.0 equiv), 1.0 mL of distilled  $\text{H}_2\text{O}$  and 4.0 mL of  $\text{CH}_3\text{CN}$  (0.04 M). The vial was covered with the electrode holder. The electrolysis was carried out at RT using a **constant current of 5.0 mA (4.5 mA/cm<sup>2</sup>)** or a **constant cell potential of 5V** between a graphite anode and a platinum plate cathode (1.4 x 0.8 x 0.2 cm submerged in solution) with stirring (1000 rpm). The complete consumption of the starting indole derivative was checked by TLC (15% to 30%  $\text{AcOEt}$ /petroleum ether). The reaction was then quenched with  $\text{H}_2\text{O}$  and diluted with  $\text{AcOEt}$ . The organic and aqueous phases were separated. The

<sup>1</sup> (a) Xu, J.; Tong, R. *Green Chem.* **2017**, *19*, 2952-2956.

aqueous phase was then extracted twice with AcOEt. The combined organic phases were then dried over  $\text{MgSO}_4$ , filtered and concentrated under vacuum. The crude was then purified by flash column chromatography or preparative TLC (15% to 25% AcOEt/ petroleum ether or 1% MeOH/ DCM).

#### 4. Optimization Study

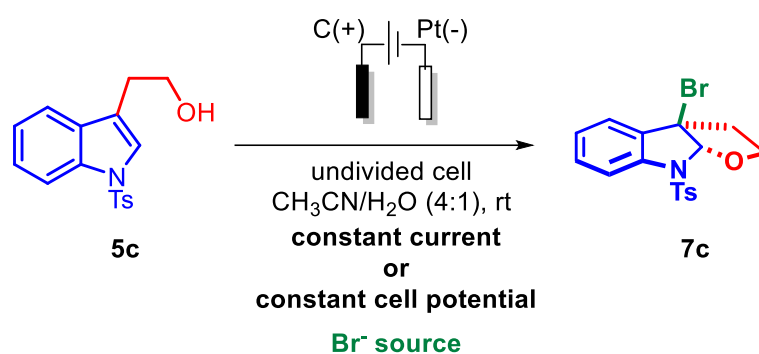

**Table S1.** Optimization of the bromocyclization of **5c** into **7c** according to general procedure A.

| Br source         | Equiv. | Constant Current       | Constant Cell Potential | Isolated Yield of <b>7c</b> |
|-------------------|--------|------------------------|-------------------------|-----------------------------|
| NaBr              | 1.0    | 4.5 mA/cm <sup>2</sup> |                         | 15%                         |
| KBr               | 1.0    | 4.5 mA/cm <sup>2</sup> |                         | 10%                         |
| FeBr <sub>3</sub> | 1.0    | 4.5 mA/cm <sup>2</sup> |                         | 13%                         |
| FeBr <sub>2</sub> | 1.0    | 4.5 mA/cm <sup>2</sup> |                         | 70%                         |
| ZnBr <sub>2</sub> | 1.0    | 4.5 mA/cm <sup>2</sup> |                         | 76%                         |
| MgBr <sub>2</sub> | 1.0    | 4.5 mA/cm <sup>2</sup> |                         | 90%                         |
| MgBr <sub>2</sub> | 0.5    | 4.5 mA/cm <sup>2</sup> |                         | 56%                         |
| MgBr <sub>2</sub> | 10.0   | 4.5 mA/cm <sup>2</sup> |                         | 89%                         |
| MgBr <sub>2</sub> | 1.0    | 9 mA/cm <sup>2</sup>   |                         | 88%                         |
| MgBr <sub>2</sub> | 1.0    | 2.7 mA/cm <sup>2</sup> |                         | 82%                         |
| MgBr <sub>2</sub> | 1.0    |                        | 5 V                     | 93%                         |
| MgBr <sub>2</sub> | 1.0    |                        | 6 V                     | 73%                         |
| MgBr <sub>2</sub> | 1.0    |                        | 4 V                     | 83%                         |

## 5. Experimental details and characterization of compounds

### *tert*-butyl 3a-bromo-3,3a-dihydro-2H-furo[2,3-b]indole-8(8aH)-carboxylate (**7a**)

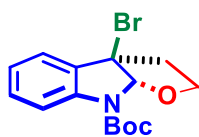

**7a** (dr 95:5)

**7a** was prepared from *tert*-butyl 3-(2-hydroxyethyl)-1H-indole-1-carboxylate **5a** (52 mg, 0.2 mmol), following general procedure A **using a constant current of 5.0 mA (4.5 mA/cm<sup>2</sup>)**. After stirring 144 minutes at room temperature (2.20 F/mol), followed by aqueous work-up, preparative TLC purification (PE/EtOAc 95:5) led to **7a** (54 mg, 0.159 mmol, **80%**, 95:5 dr) as white solid.

**7a** was prepared from *tert*-butyl 3-(2-hydroxyethyl)-1H-indole-1-carboxylate **5a** (52 mg, 0.2 mmol), following general procedure A **using a constant cell potential of 5 V**. After stirring 62 min minutes at room temperature (2.23 F/mol) followed by aqueous work-up, preparative TLC purification (PE/EtOAc 95:5) led to **7a** (51 mg, 0,150 mmol, **75%**, 95:5 dr) as white solid.

**Rf**: 0.62 (PE/EtOAc 9:1).

**<sup>1</sup>H NMR**: (300 MHz, CDCl<sub>3</sub>, 300 K)  $\delta$  (ppm) 7.82 (br, 1H), 7.39 (d,  $J = 7.6$  Hz, 1H), 7.27 (t,  $J = 8.3$  Hz, 1H), 7.06 (td,  $J = 7.6, 0.9$  Hz, 1H), 6.19 (s, 1H), 4.02-3.94 (m, 1H), 3.52-3.40 (m, 1H), 2.94-2.82 (m, 1H), 2.82-2.74 (m, 1H), 1.59 (s, 9H).

**<sup>13</sup>C NMR**: (75 MHz, CDCl<sub>3</sub>, 300 K)  $\delta$  (ppm) 151.8, 141.8, 131.7, 130.5, 124.9, 123.7, 114.9, 100.8, 82.0, 67.8, 61.8, 45.0, 28.4.

**HRMS-ESI**:  $m/z$  362.0350 ( $[M+Na]^+$ , C<sub>15</sub>H<sub>18</sub>BrNNaO<sub>3</sub><sup>+</sup> calcd. 362.0362).

### 1-(3a-bromo-3,3a-dihydro-2H-furo[2,3-b]indol-8(8aH)-yl)ethanone (**7b**)

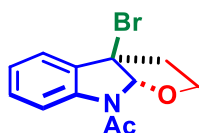

**7b** (dr 95:5)

**7b** was prepared from 1-(3-(2-hydroxyethyl)-1H-indol-1-yl)ethanone **5b** (41 mg, 0.2 mmol), following general procedure A **using a constant current of 5.0 mA (4.5 mA/cm<sup>2</sup>)**. After stirring 144 minutes at room temperature (2.20 F/mol), followed by aqueous work-up, preparative TLC purification (PE/EtOAc 9:1) led to **7b** (45 mg, 0.160 mmol, **80%**, 95:5 dr) as colorless oil.

**7b** was prepared from 1-(3-(2-hydroxyethyl)-1H-indol-1-yl)ethanone **5b** (41 mg, 0.2 mmol), following general procedure A **using a constant cell potential of 5 V**. After stirring 68 minutes at room temperature (2.19 F/mol) followed by aqueous work-up, preparative TLC purification (PE/EtOAc 9:1) led to **7b** (39 mg, 0.138 mmol, **69%**, 95:5 dr) as colorless oil.

**Rf**: 0.74 (PE/EtOAc 7:3).

**<sup>1</sup>H NMR**: (300 MHz, CDCl<sub>3</sub>, 300 K)  $\delta$  (ppm) 8.15 (d,  $J = 8.2$  Hz, 1H), 7.42 (dd,  $J = 7.6, 1$  Hz,



1H), 7.32-7.27 (m, 1H), 7.13 (td,  $J = 7.6, 1.1$  Hz, 1H), 6.13 (s, 1H), 4.00 (ddd,  $J = 9.0, 7.4, 1.8$  Hz, 1H), 3.54-3.47 (m, 1H), 2.96-2.86 (m, 1H), 2.84-2.78 (m, 1H), 2.37 (s, 3H).

$^{13}\text{C}$  NMR: (75 MHz,  $\text{CDCl}_3$ , 300 K)  $\delta$  (ppm) 169.9, 141.9, 131.7, 130.7, 124.9, 124.7, 116.7, 101.7, 68.1, 62.3, 45.4, 23.7.

HRMS-ESI:  $m/z$  303.9947 ( $[\text{M}+\text{Na}]^+$ ,  $\text{C}_{12}\text{H}_{12}\text{BrNNaO}_2^+$  calcd. 303.9944).

**3a-bromo-8-tosyl-3,3a,8,8a-tetrahydro-2H-furo[2,3-b]indole (7c):**

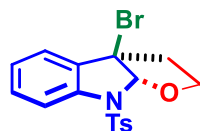

**7c** (dr 95:5)

**7c** was prepared from tert-butyl 2-(1-tosyl-1H-indol-3-yl)ethanol **5c** (63 mg, 0.2 mmol), following general procedure A **using a constant current of 5.0 mA (4.5 mA/cm<sup>2</sup>)**. After stirring 150 minutes at room temperature (2.37 F/mol), followed by aqueous work-up, preparative TLC purification (DCM/MeOH 100:1) led to **7c** (71 mg, 0.180 mmol, **90%**, 95:5 dr) as colorless solid.

**7c** was prepared from tert-butyl 2-(1-tosyl-1H-indol-3-yl)ethanol **5c** (63 mg, 0.2 mmol), following general procedure A **using a constant cell potential of 5 V**. After stirring 108 minutes at room temperature (3.00 F/mol) followed by aqueous work-up, preparative TLC purification (DCM/MeOH 100:1) led to **7c** (73 mg, 0.186 mmol, **93%**, 95:5 dr) as colorless solid.

Rf: 0.55 (PE/EtOAc 5:1).

$^1\text{H}$  NMR: (300 MHz,  $\text{CDCl}_3$ , 300 K)  $\delta$  (ppm) 7.79 (d,  $J = 8.3$  Hz, 2H), 7.45 (d,  $J = 8.2$  Hz, 1H), 7.33 (d,  $J = 7.6$  Hz, 1H), 7.28-7.22 (m, 3H), 7.08 (t,  $J = 7.5$  Hz, 1H), 6.23 (s, 1H), 3.99 (t,  $J = 8.2$  Hz, 1H), 3.46-3.38 (m, 1H), 2.88-2.78 (m, 1H), 2.74-2.69 (m, 1H), 2.36 (s, 3H).

$^{13}\text{C}$  NMR: (75 MHz,  $\text{CDCl}_3$ , 300 K)  $\delta$  (ppm) 144.5, 140.7, 135.8, 132.6, 130.7, 129.8, 127.5, 125.4, 124.9, 114.3, 103.4, 68.1, 61.5, 44.8, 21.7.

HRMS-ESI:  $m/z$  415.9926 ( $[\text{M}+\text{Na}]^+$ ,  $\text{C}_{17}\text{H}_{16}\text{BrNNaO}_3\text{S}^+$  calcd. 415.9926).

**3a-bromo-5-chloro-8-tosyl-3,3a,8,8a-tetrahydro-2H-furo[2,3-b]indole (7d):**

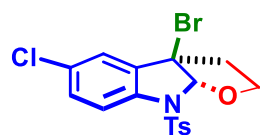

**7d** (dr 95:5)

**7d** was prepared from 2-(5-chloro-1-tosyl-1H-indol-3-yl)ethanol **5d** (69.8 mg, 0.2 mmol), following general procedure A **using a constant current of 5.0 mA (4.5 mA/cm<sup>2</sup>)**. After stirring 128 minutes at room temperature (2.00 F/mol), followed by aqueous work-up, preparative TLC purification (PE/EtOAc 8:2) led to **7d** (60 mg, 0.144 mmol, **72%**, 95:5 dr) as colorless solid.

**7d** was prepared from 2-(5-chloro-1-tosyl-1H-indol-3-yl)ethanol **5d** (69.8 mg, 0.2 mmol), following general procedure A **using a constant cell potential of 5 V**. After stirring 80 minutes at room temperature (2.50 F/mol) followed by aqueous work-up, preparative TLC purification

(PE/EtOAc 8:2) led to **7d** (53 mg, 0.124 mmol, **62%**, 95:5 dr) as colorless solid.

**Rf**: 0.35 (PE/EtOAc 7:1).

**<sup>1</sup>H NMR**: (300 MHz, CDCl<sub>3</sub>, 300 K)  $\delta$  (ppm) 7.77 (d,  $J$  = 8.3 Hz, 2H), 7.41 (d,  $J$  = 8.7 Hz, 1H), 7.32-7.22 (m, 4H), 6.21 (s, 1H), 4.04-3.99 (m, 1H), 3.47-3.40 (m, 1H), 2.86-2.77 (m, 1H), 2.71-2.66 (m, 1H), 2.38 (s, 3H).

**<sup>13</sup>C NMR**: (75 MHz, CDCl<sub>3</sub>, 300 K)  $\delta$  (ppm) 144.8, 139.3, 135.3, 134.3, 130.9, 130.1, 129.9, 127.5, 125.5, 115.5, 103.7, 68.1, 60.4, 44.6, 21.7.

**HRMS-ESI**:  $m/z$  449.9523 ([M+Na]<sup>+</sup>, C<sub>17</sub>H<sub>15</sub>BrClNNaO<sub>3</sub>S<sup>+</sup> calcd. 449.9537).

**3a-bromo-5-methyl-8-tosyl-3,3a,8,8a-tetrahydro-2H-furo[2,3-b]indole (7e):**

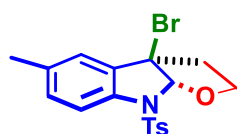

**7e** (dr 95:5)

**7e** was prepared from 2-(5-methyl-1-tosyl-1H-indol-3-yl)ethanol **5e** (65.8 mg, 0.2 mmol), following general procedure A using a constant current of 5.0 mA (4.5 mA/cm<sup>2</sup>). After stirring 138 minutes at room temperature (2.13 F/mol), followed by aqueous work-up, preparative TLC purification (DCM/MeOH 110:1) led to **7e** (51 mg, 0.126 mmol, **63%**, 95:5 dr) as colorless solid.

**7e** was prepared from 2-(5-methyl-1-tosyl-1H-indol-3-yl)ethanol **5e** (65.8 mg, 0.2 mmol), following general procedure A using a constant cell potential of 5 V. After stirring 95 minutes at room temperature (2.96 F/mol) followed by aqueous work-up, preparative TLC purification (DCM/MeOH 110:1) led to **7e** (48 mg, 0.118 mmol, **59%**, 95:5 dr) as colorless solid.

**Rf**: 0.63 (PE/EtOAc 8:2).

**<sup>1</sup>H NMR**: (300 MHz, CDCl<sub>3</sub>, 300 K)  $\delta$  (ppm) 7.76 (d,  $J$  = 8.4 Hz, 2H), 7.37 (d,  $J$  = 8.2 Hz, 1H), 7.23 (d,  $J$  = 8.4 Hz, 2H), 7.12 (s, 1H), 7.07 (dd,  $J$  = 8.3 Hz,  $J$  = 1.2 Hz, 1H), 6.19 (s, 1H), 4.02-3.97 (m, 1H), 3.47-3.40 (m, 1H), 2.85-2.77 (m, 1H), 2.73-2.68 (m, 1H), 2.35 (s, 3H), 2.29 (s, 3H).

**<sup>13</sup>C NMR**: (75 MHz, CDCl<sub>3</sub>, 300 K)  $\delta$  (ppm) 144.4, 138.4, 135.6, 134.9, 132.5, 131.6, 129.8, 127.5, 125.6, 114.4, 103.5, 68.1, 61.8, 44.8, 21.7, 21.0.

**HRMS-ESI**:  $m/z$  408.0248 ([M+H]<sup>+</sup>, C<sub>18</sub>H<sub>19</sub>BrNO<sub>3</sub>S<sup>+</sup> calcd. 408.0264).

**3a-bromo-5-methoxy-8-tosyl-3,3a,8,8a-tetrahydro-2H-furo[2,3-b]indole (7f):**

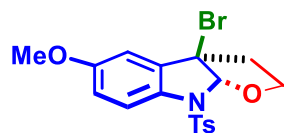

**7f** (dr 95:5)

**7f** was prepared from 2-(5-methoxy-1-tosyl-1H-indol-3-yl)ethanol **7f** (69 mg, 0.2 mmol), following general procedure A using a constant current of 5.0 mA (4.5 mA/cm<sup>2</sup>). After stirring 128 minutes at room temperature (2.00 F/mol), followed by aqueous work-up, preparative TLC

purification (PE/EtOAc 8:2) led to **7f** (62 mg, 0.146 mmol, **73%**, 95:5 dr) as colorless solid.

**7f** was prepared from 2-(5-methoxy-1-tosyl-1H-indol-3-yl)ethanol **5f** (69 mg, 0.2 mmol), following general procedure A **using a constant cell potential of 5 V**. After stirring 70 minutes at room temperature (2.56 F/mol) followed by aqueous work-up, preparative TLC purification (PE/EtOAc 8:2) led to **7f** (70 mg, 0.166 mmol, **83%**, 95:5 dr) as colorless solid.

**Rf**: 0.68 (PE/EtOAc 7:3).

**<sup>1</sup>H NMR**: (300 MHz, CDCl<sub>3</sub>, 300 K)  $\delta$  (ppm) 7.72 (d,  $J$  = 8.2 Hz, 2H), 7.43 (d,  $J$  = 8.8 Hz, 1H), 7.21 (d,  $J$  = 8.2 Hz, 2H), 6.85-6.81 (m, 2H), 6.15 (s, 1H), 4.01-3.96 (m, 1H), 3.76 (s, 3H), 3.49-3.41 (m, 1H), 2.84-2.73 (m, 1H), 2.71-2.66 (m, 1H), 2.35 (s, 3H).

**<sup>13</sup>C NMR**: (75 MHz, CDCl<sub>3</sub>, 300 K)  $\delta$  (ppm) 157.6, 144.4, 135.4, 134.1, 133.9, 129.8, 127.5, 116.9, 116.0, 109.8, 103.8, 68.0, 61.6, 55.8, 44.7, 21.6.

**HRMS-ESI**:  $m/z$  446.0022 ([M+Na]<sup>+</sup>, C<sub>18</sub>H<sub>18</sub>BrNNaO<sub>4</sub>S<sup>+</sup> calcd.446.0032).

**3a-chloro-8-tosyl-3,3a,8,8a-tetrahydro-2H-furo[2,3-b]indole (7g)**:

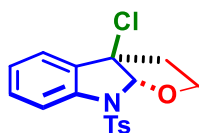

**7g** (dr 95:5)

**7g** was prepared from tert-butyl 2-(1-tosyl-1H-indol-3-yl)ethanol **5c** (63 mg, 0.2 mmol), following general procedure A **using a constant current of 5.0 mA (4.5 mA/cm<sup>2</sup>)** and MgCl<sub>2</sub> (18.8 mg, 0.2 mmol). After stirring 128 minutes at room temperature (2.00 F/mol), followed by aqueous work-up, preparative TLC purification (PE/EtOAc 7:3) led to **7g** (24 mg, 0.068 mmol, **34%**, 95:5 dr) as colorless solid.

**7g** was prepared from tert-butyl 2-(1-tosyl-1H-indol-3-yl)ethanol **5c** (63 mg, 0.2 mmol), following general procedure A **using a constant cell potential of 5 V** and MgCl<sub>2</sub> (18.8 mg, 0.2 mmol). After stirring 303 minutes at room temperature (6.96 F/mol) followed by aqueous work-up, preparative TLC purification (PE/EtOAc 7:3) led to **7g** (26 mg, 0.074 mmol, **37%**, 95:5 dr) as colorless solid.

**Rf**: 0.33 (PE/EtOAc 5:1).

**<sup>1</sup>H NMR**: (300 MHz, CDCl<sub>3</sub>, 300 K)  $\delta$  (ppm) 7.79 (d,  $J$  = 8.3 Hz, 2H), 7.48 (d,  $J$  = 8.1 Hz, 1H), 7.35-7.25 (m, 2H), 7.24 (d,  $J$  = 8.3 Hz, 2H), 7.10 (td,  $J$  = 7.5 Hz,  $J$  = 0.9 Hz, 1H), 6.12 (s, 1H), 4.13-4.07 (m, 1H), 3.53-3.44 (m, 1H), 2.80-2.69 (m, 1H), 2.66-2.59 (m, 1H), 2.37 (s, 3H).

**<sup>13</sup>C NMR**: (75 MHz, CDCl<sub>3</sub>, 300 K)  $\delta$  (ppm) 144.6, 141.2, 135.7, 131.4, 130.9, 129.8, 127.5, 125.0, 124.9, 114.3, 102.7, 72.9, 68.3, 43.9, 21.7.

**HRMS-ESI**:  $m/z$  372.0428 ([M+Na]<sup>+</sup>, C<sub>17</sub>H<sub>16</sub>ClNNaO<sub>3</sub>S<sup>+</sup> calcd. 372.0432).

**di-tert-butyl-3a-bromo-2,3,3a,8a-tetrahydropyrrolo[2,3-b]indole-1,8-dicarboxylate (8a)**:

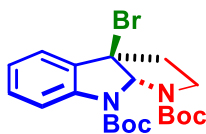

**8a** (*dr* 95:5)

**8a** was prepared from *tert*-butyl 3-(2-((*tert*-butoxycarbonyl)amino)ethyl)-1H-indole-1-carboxylate **6a** (69.2 mg, 0.2 mmol), following general procedure A **using a constant current of 5.0 mA (4.5 mA/cm<sup>2</sup>)**. After stirring 138 minutes at room temperature (2.15 F/mol), followed by aqueous work-up, preparative TLC purification (PE/EtOAc 9:1) led to **8a** (53 mg, 0.122 mmol, **61%**, 95:5 *dr*) as colorless oil.

**8a** was prepared from *tert*-butyl 3-(2-((*tert*-butoxycarbonyl)amino)ethyl)-1H-indole-1-carboxylate **6a** (69.2 mg, 0.2 mmol), following general procedure A **using a constant cell potential of 5 V**. After stirring 60 minutes at room temperature, the solution was charged to 2.36 F/mol followed by aqueous work-up, preparative TLC purification (PE/EtOAc 9:1) led to **8a** (40 mg, 0.092 mmol, **46%**, 95:5 *dr*) as colorless oil.

**Rf**: 0.54 (PE/EtOAc 9:1).

**<sup>1</sup>H NMR**: (300 MHz, CDCl<sub>3</sub>, 300 K)  $\delta$  (ppm) 7.58 (d, *J* = 6.5 Hz, 1H), 7.35 (d, *J* = 7.7 Hz, 1H), 7.28 (td, *J* = 7.6 Hz, *J* = 1.4 Hz, 1H), 7.08 (td, *J* = 7.4 Hz, *J* = 0.8 Hz, 1H), 6.43 (s, 1H), 3.75-3.69 (m, 1H), 2.84-2.69 (m, 3H), 1.58 (s, 9H), 1.48 (s, 9H).

**<sup>13</sup>C NMR**: (75 MHz, CDCl<sub>3</sub>, 300 K)  $\delta$  (ppm) 153.5, 152.3, 142.2, 132.8, 130.4, 124.2, 123.9, 117.5, 83.9, 82.2, 80.9, 62.3, 46.3, 41.7, 28.5, 28.4.

**HRMS-ESI**: *m/z* 461.1029 ([M+Na]<sup>+</sup>, C<sub>20</sub>H<sub>27</sub>BrN<sub>2</sub>NaO<sub>4</sub><sup>+</sup> calcd. 461.1046).

**1-benzyl 8-*tert*-butyl 3a-bromo-3,3a-dihydropyrrolo[2,3-*b*]indole-1,8(2H,8aH)-dicarboxylate (8b)**

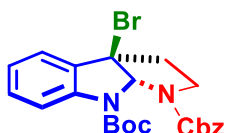

**8b** (*dr* 95:5)

**8b** was prepared from *tert*-butyl 3-(2-(((benzyloxy)carbonyl)amino)ethyl)-1H-indole-1-carboxylate **6b** (39 mg, 0.1 mmol), following general procedure A **using a constant current of 5.0 mA (4.5 mA/cm<sup>2</sup>)**. After stirring 140 minutes at room temperature (2.20 F/mol), followed by aqueous work-up, preparative TLC purification (PE/EtOAc 9:1) led to **8b** (33 mg, 0.069 mmol, **70%**, 95:5 *dr*) as white solid.

**8b** was prepared from *tert*-butyl 3-(2-(((benzyloxy)carbonyl)amino)ethyl)-1H-indole-1-carboxylate **6b** (79 mg, 0.2 mmol), following general procedure A **using a constant cell potential of 5 V**. After stirring 67 minutes at room temperature, (2.4 F/mol) followed by aqueous work-up, preparative TLC purification (PE/EtOAc 9:1) led to **8b** (60 mg, 0.127 mmol, **63%**, 95:5 *dr*) as white solid.

**Rf:** 0.41 (PE/EtOAc 9:1).

**<sup>1</sup>H NMR:** (300 MHz, CDCl<sub>3</sub>, 300 K)  $\delta$  (ppm) 7.64 (d,  $J$  = 7.6 Hz, 1H), 7.45-7.27 (m, 7H), 7.10 (t,  $J$  = 7.0 Hz, 1H), 6.46 (s, 1H), 5.18 (s, 2H), 3.85-3.75 (m, 1H), 2.99-2.67 (m, 3H), 1.55 (s, 9H).

**<sup>13</sup>C NMR:** (75 MHz, CDCl<sub>3</sub>, 300 K)  $\delta$  (ppm) 154.1, 152.2, 142.1, 136.6, 132.5, 130.6, 128.5, 128.1, 128.0, 124.3, 123.8, 117.5, 84.1, 82.3, 67.3, 62.1, 46.4, 40.9, 28.3.

**HRMS-ESI:**  $m/z$  495.0870 ([M+Na]<sup>+</sup>, C<sub>23</sub>H<sub>25</sub>BrN<sub>2</sub>NaO<sub>4</sub><sup>+</sup> calcd. 495.0890).

**8-*tert*-butyl 1-methyl 3a-bromo-3,3a-dihydropyrrolo[2,3-*b*]indole-1,8(2H,8aH)-dicarboxylate (8c)**

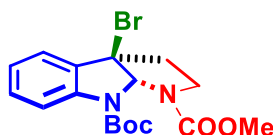

**8c** (dr 95:5)

**8c** was prepared from *tert*-butyl 3-(2-((methoxycarbonyl)amino)ethyl)-1H-indole-1-carboxylate **6c** (64 mg, 0.2 mmol), following general procedure A **using a constant current of 5.0 mA (4.5 mA/cm<sup>2</sup>)**. After stirring 150 minutes at room temperature (2.30 F/mol), followed by aqueous work-up, preparative TLC purification (PE/EtOAc 8:2) led to **8c** (70 mg, 0.176 mmol, **89%**, 95:5 dr) as white solid.

**8c** was prepared from *tert*-butyl 3-(2-((methoxycarbonyl)amino)ethyl)-1H-indole-1-carboxylate **6c** (64 mg, 0.2 mmol), following general procedure A **using a constant cell potential of 5 V**. After stirring 94 minutes at room temperature (2.61 F/mol) followed by aqueous work-up, preparative TLC purification (PE/EtOAc 8:2) led to **8c** (69 mg, 0.174 mmol, **87%**, 95:5 dr) as white solid.

**Rf:** 0.66 (PE/EtOAc 7:3).

**<sup>1</sup>H NMR:** (300 MHz, CDCl<sub>3</sub>, 300 K)  $\delta$  (ppm) 7.62 (d,  $J$  = 8.3 Hz, 1H), 7.35 (d,  $J$  = 7.5 Hz, 1H), 7.28 (t,  $J$  = 7.5 Hz, 1H), 7.08 (t,  $J$  = 7.5, 1H), 6.37 (s, 1H), 3.78-3.73 (m, 1H), 3.72 (s, 3H), 2.92-2.65 (m, 3H), 1.58 (s, 9H).

**<sup>13</sup>C NMR:** (75 MHz, CDCl<sub>3</sub>, 300 K)  $\delta$  (ppm) 154.7, 152.1, 142.0, 132.4, 130.6, 124.3, 123.8, 117.4, 84.0, 82.2, 62.1, 52.8, 46.3, 41.1, 28.3.

**HRMS-ESI:**  $m/z$  419.0558 ([M+Na]<sup>+</sup>, C<sub>17</sub>H<sub>21</sub>BrN<sub>2</sub>NaO<sub>4</sub><sup>+</sup> calcd. 419.0577).

***tert*-butyl 3a-bromo-8-tosyl-3,3a,8,8a-tetrahydropyrrolo[2,3-*b*]indole-1(2H)-carboxylate (8d)**

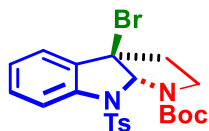

**8d** (dr 95:5)

**8d** was prepared from *tert*-butyl (2-(1-tosyl-1H-indol-3-yl)ethyl)carbamate **6d** (83 mg, 0.2 mmol), following general procedure A **using a constant current of 5.0 mA (4.5 mA/cm<sup>2</sup>)**. After stirring 140 minutes at room temperature (2.25 F/mol) followed by aqueous work-up, preparative TLC purification (PE/EtOAc 9:1) led to **8d** (90 mg, 0.182 mmol, **91%**, 95:5 dr) as white solid.

**8d** was prepared from *tert*-butyl (2-(1-tosyl-1H-indol-3-yl)ethyl)carbamate **6d** (83 mg, 0.2 mmol), following general procedure A **using a constant cell potential of 5 V**. After stirring 58 minutes at room temperature, (1.93 F/mol) followed by aqueous work-up, preparative TLC purification (PE/EtOAc 9:1) led to **8d** (80 mg, 0.162 mmol, **81%**, 95:5 dr) as white solid.

**Rf**: 0.56 (PE/EtOAc 8:2).

**<sup>1</sup>H NMR**: (300 MHz, CDCl<sub>3</sub>, 300 K) δ (ppm) 7.68 (d, *J* = 6.9 Hz, 2H), 7.53 (d, *J* = 8.1 Hz, 1H), 7.31-7.26 (m, 2H), 7.16-7.11 (m, 3H), 6.29 (s, 1H), 3.78-3.73 (m, 1H), 2.76-2.62 (m, 3H), 2.31 (s, 3H), 1.54 (s, 9H).

**<sup>13</sup>C NMR**: (75 MHz, CDCl<sub>3</sub>, 300 K) δ (ppm) 153.2, 144.2, 141.3, 135.7, 133.8, 130.6, 129.5, 127.9, 125.9, 124.3, 117.8, 86.8, 81.9, 62.2, 45.9, 42.5, 28.4, 21.6.

**HRMS-ESI**: *m/z* 515.0585 ([M+Na]<sup>+</sup>, C<sub>22</sub>H<sub>25</sub>BrN<sub>2</sub>NaO<sub>4</sub>S<sup>+</sup> calcd. 515.0611).

**benzyl 3a-bromo-8-tosyl-3,3a,8,8a-tetrahydropyrrolo[2,3-b]indole-1(2H)-carboxylate (8e)**

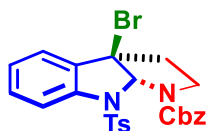

**8e** (dr 95:5)

**8e** was prepared from benzyl (2-(1-tosyl-1H-indol-3-yl)ethyl)carbamate **6e** (90 mg, 0.2 mmol), following general procedure A **using a constant current of 5.0 mA (4.5 mA/cm<sup>2</sup>)**. After stirring 140 minutes at room temperature (2.20 F/mol) followed by aqueous work-up, preparative TLC purification (PE/EtOAc 9:1) led to **4e** (73 mg, 0.138 mmol, **69%**, 95:5 dr) as white solid.

**8e** was prepared from benzyl (2-(1-tosyl-1H-indol-3-yl)ethyl)carbamate **6e** (90 mg, 0.2 mmol), following general procedure A **using a constant cell potential of 5 V**. After stirring 73 minutes at room temperature, (2.32 F/mol) followed by aqueous work-up, preparative TLC purification (PE/EtOAc 9:1) led to **8e** (44 mg, 0.083 mmol, **42%**, 95:5 dr) as white solid.

**Rf**: 0.55 (PE/EtOAc 8:2).

**<sup>1</sup>H NMR**: (300 MHz, CDCl<sub>3</sub>, 300 K) δ (ppm) 7.64 (br, 1H), 7.61 (d, *J* = 8.2 Hz, 2H), 7.56-7.43 (m, 2H), 7.43-7.25 (m, 5H), 7.20-7.09 (m, 3H), 6.30 (s, 1H), 5.41-5.11 (m, 2H), 3.86-3.80 (m, 1H), 2.86-2.79 (m, 1H), 2.75-2.61 (m, 2H), 2.32 (s, 3H).

**<sup>13</sup>C NMR**: (75 MHz, CDCl<sub>3</sub>, 300 K) δ (ppm) 153.9, 144.4, 141.3, 136.3, 135.5, 133.6, 130.8, 129.6, 128.8, 128.6, 128.3, 128.0, 126.1, 124.4, 118.0, 86.9, 67.9, 61.8, 46.1, 42.4, 21.7.

**HRMS-ESI**: *m/z* 549.0441 ([M+Na]<sup>+</sup>, C<sub>25</sub>H<sub>23</sub>BrN<sub>2</sub>NaO<sub>4</sub>S<sup>+</sup> calcd. 549.0454).

**Ethyl-3a-bromo-8-tosyl-3,3a,8,8a-tetrahydropyrrolo[2,3-b]indole-1(2H)-carboxylate (8f):**

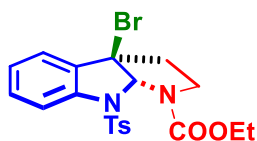

**8f** (dr 95:5)

**8f** was prepared from ethyl (2-(1-tosyl-1H-indol-3-yl)ethyl)carbamate **6f** (77.2 mg, 0.2 mmol), following general procedure A using a constant current of 5.0 mA (4.5 mA/cm<sup>2</sup>). After stirring 130 minutes at room temperature (2.13 F/mol) followed by aqueous work-up, preparative TLC purification (PE/EtOAc 7:3) led to **4f** (72 mg, 0.156 mmol, **78%**, 95:5 dr) as colorless oil.

**8f** was prepared from ethyl (2-(1-tosyl-1H-indol-3-yl)ethyl)carbamate **6f** (77.2 mg, 0.2 mmol), following general procedure A using a constant cell potential of 5 V. After stirring 83 minutes at room temperature (2.55 F/mol) followed by aqueous work-up, preparative TLC purification (PE/EtOAc 7:3) led to **8f** (76 mg, 0.164 mmol, **82%**, 95:5 dr) as colorless oil.

**Rf**: 0.69 (PE/EtOAc 7:3).

**<sup>1</sup>H NMR**: (300 MHz, CDCl<sub>3</sub>, 300 K) δ (ppm) 7.67 (d, *J* = 7.8 Hz, 2H), 7.59 (d, *J* = 8.2 Hz, 1H), 7.33-7.26 (m, 2H), 7.16 (d, *J* = 7.6 Hz, 3H), 6.27 (s, 1H), 4.24 (q, *J* = 7.2 Hz, 2H), 3.81-3.76 (m, 1H), 2.83-2.62 (m, 3H), 2.32 (s, 3H), 1.36 (t, *J* = 6.6 Hz, 3H).

**<sup>13</sup>C NMR**: (75 MHz, CDCl<sub>3</sub>, 300 K) δ (ppm) 154.2, 144.4, 141.3, 135.6, 133.7, 130.8, 129.5, 128.0, 126.1, 124.3, 118.1, 86.8, 62.3, 61.9, 45.9, 42.2, 21.6, 14.6.

**HRMS-ESI**: *m/z* 487.0289 ([M+Na]<sup>+</sup>, C<sub>20</sub>H<sub>21</sub>BrN<sub>2</sub>NaO<sub>4</sub>S<sup>+</sup> calcd. 487.0298).

#### di-tert-butyl

(3aR,8aR)-3a,6-dibromo-2,3,3a,8a-tetrahydropyrrolo[2,3-b]indole-1,8-dicarboxylate (**8g**):

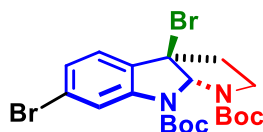

**8g** (dr 95:5)

**8g** was prepared from tert-butyl 6-bromo-3-(2-((tert-butoxycarbonyl)amino)ethyl)-1H-indole-1-carboxylate **6g** (87.6 mg, 0.2 mmol), following general procedure A using a constant current of 5.0 mA (4.5 mA/cm<sup>2</sup>). After stirring 140 minutes at room temperature (2.18 F/mol) followed by aqueous work-up, preparative TLC purification (PE/EtOAc 9:1) led to **8g** (91 mg, 0.176 mmol, **88%**, 95:5 dr) as white solid.

**Rf**: 0.61 (PE/EtOAc 9:1).

**<sup>1</sup>H NMR**: (300 MHz, CDCl<sub>3</sub>, 300 K) δ (ppm) 7.82 (br, 1H), 7.20 (s, 2H), 6.40 (s, 1H), 3.76-3.71 (m, 1H), 2.83-2.75 (m, 1H), 2.74-2.63 (m, 2H), 1.57 (s, 9H), 1.46 (s, 9H).

**<sup>13</sup>C NMR**: (75 MHz, CDCl<sub>3</sub>, 300 K) δ (ppm) 153.3, 151.8, 143.2, 131.7, 127.1, 125.1, 124.3, 120.5, 84.4, 82.8, 80.9, 61.5, 46.3, 42.0, 28.4, 28.3.

**HRMS-ESI**: *m/z* 517.0311 ([M+H]<sup>+</sup>, C<sub>20</sub>H<sub>27</sub>Br<sub>2</sub>N<sub>2</sub>O<sub>4</sub><sup>+</sup> calcd. 517.0332).

#### 8-tert-butyl

#### 1-methyl

3a,6-dibromo-3,3a-dihydropyrrolo[2,3-b]indole-1,8(2H,8aH)-dicarboxylate (**8h**)

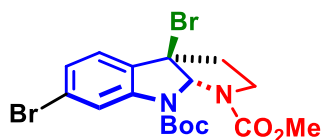

**8h** (dr 95:5)

**8h** was prepared from *tert*-butyl 6-bromo-3-(2-(((methylperoxy)methylene)amino)ethyl)-1H-indole-1-carboxylate **6h** (79 mg, 0.2 mmol), following general procedure A using a constant current of 5.0 mA (4.5 mA/cm<sup>2</sup>). After stirring 140 minutes at room temperature (2.21 F/mol) followed by aqueous work-up, preparative TLC purification (PE/EtOAc 8:2) led to **8h** (77 mg, 0.162 mmol, **81%**, 95:5 dr) as colorless oil.

**8h** was prepared from *tert*-butyl 6-bromo-3-(2-(((methylperoxy)methylene)amino)ethyl)-1H-indole-1-carboxylate **6h** (79 mg, 0.2 mmol), following general procedure A using a constant cell potential of 5 V. After stirring 78 minutes at room temperature, (2.15 F/mol) followed by aqueous work-up, preparative TLC purification (PE/EtOAc 9:1) led to **8h** (78 mg, 0.164 mmol, **82%**, 95:5 dr) as colorless oil.

**Rf**: 0.60 (PE/EtOAc 8:2).

**<sup>1</sup>H NMR**: (300 MHz, CDCl<sub>3</sub>, 300 K) δ (ppm) 7.86 (s, 1H), 7.24-7.19 (m, 2H), 6.35 (s, 1H), 3.79 (dd, *J* = 10.4, 7.3 Hz, 1H), 3.72 (s, 3H), 2.91-2.82 (m, 1H), 2.80-2.66 (m, 2H), 1.58 (s, 9H).

**<sup>13</sup>C NMR**: (75 MHz, CDCl<sub>3</sub>, 300 K) δ (ppm) 154.6, 151.8, 143.1, 131.4, 127.3, 125.0, 124.5, 120.6, 84.5, 82.8, 61.4, 52.9, 46.4, 41.3, 28.3.

**HRMS-ESI**: *m/z* 496.9663 ([M+Na]<sup>+</sup>, C<sub>17</sub>H<sub>20</sub>BrN<sub>2</sub>NaO<sub>4</sub><sup>+</sup> calcd. 496.9682).

***tert*-butyl (2-(6-bromo-1-tosyl-1H-indol-3-yl)ethyl)carbamate (6i)**

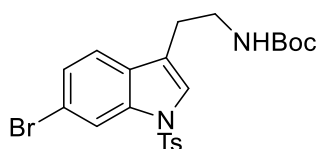

**6i** (white solid, 718 mg, **76%**) was prepared from 2-(6-bromo-1H-indol-3-yl)ethanamine (458 mg, 1.91 mmol), according to the procedure reported by Tong.<sup>1</sup>

**Rf**: 0.26 (PE/EtOAc 8:2).

**<sup>1</sup>H NMR**: (300 MHz, CDCl<sub>3</sub>, 300 K) δ (ppm) 8.15 (m, 1H), 7.73 (d, *J* = 8.4 Hz, 2H), 7.37-7.30 (m, 3H), 7.23 (d, *J* = 8.3 Hz, 2H), 4.61 (brs, 1H), 3.37 (t, *J* = 6.8 Hz, 2H), 2.82 (t, *J* = 6.9 Hz, 2H), 2.34 (s, 3H), 1.44 (s, 9H).

**<sup>13</sup>C NMR**: (75 MHz, CDCl<sub>3</sub>, 300 K) δ (ppm) 155.9, 145.3, 136.0, 135.1, 130.1, 129.7, 126.9, 126.6, 123.9, 120.7, 119.9, 118.6, 116.9, 79.6, 40.2, 28.5, 25.7, 21.7.

**HRMS-ESI**: *m/z* 515.0592 ([M+Na]<sup>+</sup>, C<sub>22</sub>H<sub>25</sub>BrN<sub>2</sub>NaO<sub>4</sub>S<sup>+</sup> calcd. 515.0611).

***tert*-butyl 3a,6-dibromo-8-tosyl-3,3a,8,8a-tetrahydropyrrolo[2,3-b]indole-1(2H)-carboxylate (8i)**



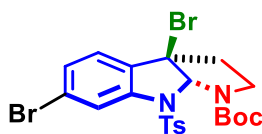

**8i** (dr 95:5)

**8i** was prepared from *tert*-butyl (2-(6-bromo-1-tosyl-1H-indol-3-yl)ethyl)carbamate **6i** (99 mg, 0.2 mmol), following general procedure A **using a constant current of 5.0 mA (4.5 mA/cm<sup>2</sup>)**. After stirring 135 minutes at room temperature (2.1 F/mol) followed by aqueous work-up, preparative TLC purification (PE/EtOAc 9:1) led to **4i** (100 mg, 0.175 mmol, **88%**, 95:5 dr) as colorless oil.

**8i** was prepared from *tert*-butyl (2-(6-bromo-1-tosyl-1H-indol-3-yl)ethyl)carbamate **6i** (99 mg, 0.2 mmol), following general procedure A **using a constant cell potential of 5 V**. After stirring 80 minutes at room temperature, (2.31 F/mol) followed by aqueous work-up, preparative TLC purification (PE/EtOAc 9:1) led to **8i** (95 mg, 0.166 mmol, **83%**, 95:5 dr) as colorless oil.

**Rf**: 0.65 (PE/EtOAc 8:2).

**<sup>1</sup>H NMR**: (300 MHz, CDCl<sub>3</sub>, 300 K) δ (ppm) 7.75-7.68 (m, 3H), 7.26 (dd, *J* = 8.2, 1.8 Hz, 1H), 7.21 (d, *J* = 8.3 Hz, 2H), 7.13 (d, *J* = 8.2 Hz, 1H), 6.28 (s, 1H), 3.78 (m, 1H), 2.73 (m, 1H), 2.66-2.58 (m, 2H), 2.35 (s, 3H), 1.53 (s, 9H).

**<sup>13</sup>C NMR**: (75 MHz, CDCl<sub>3</sub>, 300 K) δ (ppm) 153.1, 144.6, 142.5, 135.5, 132.8, 129.7, 129.0, 127.9, 125.6, 124.5, 120.7, 87.3, 82.0, 61.5, 46.0, 42.6, 28.4, 21.7.

**HRMS-ESI**: *m/z* 592.9703 ([M+Na]<sup>+</sup>, C<sub>22</sub>H<sub>24</sub>Br<sub>2</sub>N<sub>2</sub>NaO<sub>4</sub>S<sup>+</sup> calcd. 592.9716).

**di-*tert*-butyl-3a-bromo-2,3,3a,8a-tetrahydropyrrolo[2,3-*b*]indole-1,8-dicarboxylate (8j):**

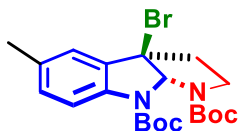

**8j** (dr 95:5)

**8j** was prepared from *tert*-butyl 3-(2-(((*tert*-butoxycarbonyl)amino)ethyl)-5-methyl-1H-indole-1-carboxylate **6j** (74.8 mg, 0.2 mmol), following general procedure A **using a constant current of 5.0 mA (4.5 mA/cm<sup>2</sup>)**. After stirring 128 minutes at room temperature (2.00 F/mol) followed by aqueous work-up, preparative TLC purification (PE/EtOAc 9:1) led to **8j** (69 mg, 0.154 mmol, **77%**, 95:5 dr) as white solid.

**Rf**: 0.52 (PE/EtOAc 9:1).

**<sup>1</sup>H NMR**: (300 MHz, CDCl<sub>3</sub>, 300 K) δ (ppm) 7.43 (br, 1H), 7.14 (s, 1H), 7.08 (d, *J* = 8.4 Hz, 1H), 6.41 (s, 1H), 3.73-3.69 (m, 1H), 2.83-2.68 (m, 3H), 2.32 (s, 3H), 1.57 (s, 9H), 1.48 (s, 9H).

**<sup>13</sup>C NMR**: (75 MHz, CDCl<sub>3</sub>, 300 K) δ (ppm) 153.5, 152.3, 139.9, 133.9, 132.7, 131.2, 124.1, 117.4, 84.0, 82.0, 80.8, 77.5, 77.2, 76.8, 62.6, 46.2, 41.6, 28.5, 28.4, 21.1.

**HRMS-ESI**: *m/z* 475.1182 ([M+Na]<sup>+</sup>, C<sub>21</sub>H<sub>29</sub>BrN<sub>2</sub>NaO<sub>4</sub><sup>+</sup> calcd. 475.1203).

**(2*S*,3*aR*,8*aS*)-8-*tert*-butyl-2-methyl-3a-bromo-1-tosyl-1,3,3a,8a-tetrahydropyrrolo[2,3-*b*]indo**

**le-2,8(2H)-dicarboxylate (8k):**

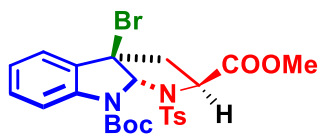

**8k** (*dr* 90:10)

**8k** was prepared from (S)-tert-butyl 3-(3-methoxy-2-(4-methylphenylsulfonamido)-3-oxopropyl)-1H-indole-1-carboxylate **6k** (47.2 mg, 0.1 mmol), following general procedure A **using a constant current of 5.0 mA (4.5 mA/cm<sup>2</sup>)** and 18.4 mg of MgBr<sub>2</sub> (0.1 mmol). After stirring 65 minutes at room temperature (2.00 F/mol) followed by aqueous work-up, preparative TLC purification (PE/EtOAc 8:2) led to **8k** (50 mg, 0.091 mmol, **91%**, 90:10 *dr* in favor of the *exo* isomer) as colorless oil.

**8k** was prepared from (S)-tert-butyl 3-(3-methoxy-2-(4-methylphenylsulfonamido)-3-oxopropyl)-1H-indole-1-carboxylate **6k** (47.2 mg, 0.1 mmol), following general procedure A **using a constant cell potential of 5 V**. After stirring 61 minutes at room temperature (2.78 F/mol) followed by aqueous work-up, preparative TLC purification (PE/EtOAc 8:2) led to **8k** (48 mg, 0.087 mmol, **87%**, 90:10 *dr* in favor of the *exo* isomer) as colorless oil.

*Data for the mixture of diastereoisomers (dr 90:10).*

**Rf:** 0.65 (PE/EtOAc 7:3). [ $\alpha$ ]<sub>D</sub><sup>25</sup> = +99.5 (*c* = 0.5, CHCl<sub>3</sub>).

**<sup>1</sup>H NMR:** (300 MHz, CDCl<sub>3</sub>, 300 K)  $\delta$  (ppm) 7.93 (d, *J* = 7.8 Hz, 0.2H), 7.52 (br, 1.8H), 7.29-7.00 (m, 6H), 6.48 (s, 0.1H), 6.37 (s, 0.9H), 4.03-3.90 (m, 1H), 3.79 (s, 2.7H), 3.22 (dd, *J* = 12.9 Hz, *J* = 6.3 Hz, 1H), 3.14 (s, 0.3H), 2.96 (t, *J* = 10.6 Hz, 1H), 2.40 (s, 0.3H), 2.35 (s, 2.7H), 1.63 (s, 8H), 1.44 (s, 1H).

**<sup>13</sup>C NMR:** (75 MHz, CDCl<sub>3</sub>, 300 K)  $\delta$  (ppm) 171.2, 151.8, 143.6, 140.4 (minor), 136.9, 131.2 (minor), 130.4, 129.5 (minor), 129.4 (two C), 127.3 (two C), 124.8, 124.2 (minor), 122.9, 117.9, 117.4 (minor), 85.5, 83.2, 61.9, 61.6 (minor), 59.9, 53.1, 52.4 (minor), 44.9 (minor), 42.1, 28.3, 28.1 (minor), 21.6.

**HRMS-ESI:** *m/z* 573.0658 ([M+Na]<sup>+</sup>, C<sub>24</sub>H<sub>27</sub>BrN<sub>2</sub>NaO<sub>6</sub>S<sup>+</sup> calcd. 573.0665).

**(2S,3aR,8aR)-8-benzyl-1-tert-butyl-2-methyl-3a-bromo-3,3a-dihydropyrrolo[2,3-b]indole-1,2,8(2H,8aH)-tricarboxylate (8l):**

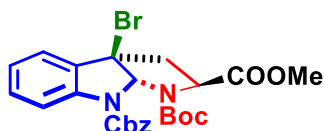

**8l** (*dr* 90:10)

**8l** was prepared from ethyl benzyl (S)-3-(2-((tert-butoxycarbonyl)amino)-3-methoxy-3-oxopropyl)-1H-indole-1-carboxylate **7l** (90.4 mg, 0.2 mmol), following general procedure A **using a constant current of 5.0 mA (4.5 mA/cm<sup>2</sup>)**.

After stirring 128 minutes at room temperature (2.00 F/mol) followed by aqueous work-up, preparative TLC purification (PE/EtOAc 7:3) led to **8l** (73 mg, 0.138 mmol, **69%**, 90:10 dr in favor of the *exo* isomer) as colorless oil.

**8l** was prepared from ethyl benzyl (S)-3-(2-((tert-butoxycarbonyl)amino)-3-methoxy-3-oxopropyl)-1H-indole-1-carboxylate **7l** (90.4 mg, 0.2 mmol), following general procedure A **using a constant cell potential of 5 V**. After stirring 145 minutes at room temperature (3.42 F/mol) followed by aqueous work-up, preparative TLC purification (PE/EtOAc 7:3) led to **8l** (76 mg, 0.144 mmol, **72%**, 90:10 dr in favor of the *exo* isomer) as colorless oil.

*Data for the mixture of diastereoisomers (dr 90:10).*

**Rf**: 0.34 (PE/EtOAc 7:3).  $[\alpha]_{\text{D}}^{25} = -91.2$  ( $c = 0.5$ ,  $\text{CHCl}_3$ ).

**$^1\text{H}$  NMR**: (300 MHz,  $\text{CDCl}_3$ , 300 K)  $\delta$  (ppm) 7.63 (br, 1H), 7.46 (d,  $J = 6.0$  Hz, 2H), 7.41-7.28 (m, 5H), 7.15 (t,  $J = 7.6$  Hz, 1H), 6.50 (s, 0.1H), 6.46 (s, 0.9H), 5.46 (d,  $J = 12.4$  Hz, 1H), 5.25 (br, 1H), 3.93 (dd,  $J = 10.5$  Hz,  $J = 6.5$  Hz, 1H), 3.75 (s, 3H), 3.24 (dd,  $J = 12.1$  Hz,  $J = 6.5$  Hz, 1H), 2.82 (dd,  $J = 12.3$  Hz,  $J = 10.4$  Hz, 1H), 1.43 (s, 1H), 1.38 (s, 8H).

**$^{13}\text{C}$  NMR**: (75 MHz,  $\text{CDCl}_3$ , 300 K)  $\delta$  (ppm) 171.5, 153.4, 153.3, 142.0 (minor), 140.9, 135.9, 132.8, 132.5 (minor), 131.0, 128.7, 128.3, 128.0, 124.9, 124.4 (minor), 124.0 (minor), 123.5, 118.4, 84.6, 83.8, 81.9, 68.2, 59.6, 52.6, 52.2 (minor), 41.7, 28.4 (minor), 28.3.

**HRMS-ESI**:  $m/z$  553.0921 ( $[\text{M}+\text{Na}]^+$ ,  $\text{C}_{25}\text{H}_{27}\text{BrN}_2\text{NaO}_6^+$  calcd. 553.0945).

**(2S,3aR,8aS)-1-tert-butyl-2-methyl-8-acetyl-3a-bromo-3,3a,8,8a-tetrahydropyrrolo[2,3-b]indole-1,2(2H)-dicarboxylate (8m)**:

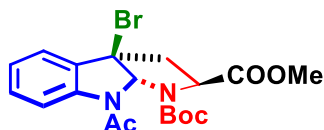

**8m** (*dr* 90:10)

**8m** was prepared from methyl 1-acetyl-N<sup>a</sup>-(tert-butoxycarbonyl)-L-tryptophanate **6m** (72 mg, 0.2 mmol), following general procedure A **using a constant current of 5.0 mA (4.5 mA/cm<sup>2</sup>)**. After stirring 120 minutes at room temperature (2.00 F/mol) followed by aqueous work-up, preparative TLC purification (PE/EtOAc 8:2) led to **8m** (82 mg, 0.188 mmol, **94%**, 90:10 dr in favor of the *exo* isomer) as white solid.

**8m** was prepared from methyl 1-acetyl-N<sup>a</sup>-(tert-butoxycarbonyl)-L-tryptophanate **6m** (72 mg, 0.2 mmol), following general procedure A **using a constant cell potential of 5 V**. After stirring 68 minutes at room temperature (2.50 F/mol) followed by aqueous work-up, preparative TLC purification (PE/EtOAc 8:2) led to **8m** (84 mg, 0.192 mmol, **96%**, 90:10 dr in favor of the *exo* isomer) as white solid.

*Data for the mixture of diastereoisomers (dr 90:10).*

**Rf**: 0.46 (PE/EtOAc 8:2),  $[\alpha]_{\text{D}}^{25} = -200.8$  ( $c = 0.5$ ,  $\text{CHCl}_3$ ).

**<sup>1</sup>H NMR:** (300 MHz, CDCl<sub>3</sub>, 300 K) δ (ppm) 7.98 (br, 1H), 7.39-7.33 (m, 2H), 7.17 (t, *J* = 7.6 Hz, 1H), 6.14 (s, 1H), 3.89 (t, *J* = 7.6 Hz, 1H), 3.74 (s, 3H), 3.25 (dd, *J* = 12.6 Hz, *J* = 6.5 Hz, 1H), 2.81 (t, *J* = 11.2 Hz, 1H), 2.64 (s, 3H), 1.32 (s, 9H).

**<sup>13</sup>C NMR:** (75 MHz, CDCl<sub>3</sub>, 300 K) δ (ppm) 171.7, 170.9, 151.7, 141.5, 132.4, 130.9, 125.3, 123.1, 119.9, 85.4, 81.9, 59.9, 59.7, 52.6, 42.1, 28.1, 23.7.

**HRMS-ESI:** *m/z* 439.0846 ([M+H]<sup>+</sup>, C<sub>19</sub>H<sub>24</sub>BrN<sub>2</sub>O<sub>5</sub><sup>+</sup> calcd. 439.0863).

**(2R,3aS,8aS)-methyl-3a-bromo-1,8-ditosyl-1,2,3,3a,8,8a-hexahydropyrrolo[2,3-b]indole-2-carboxylate (8n):**

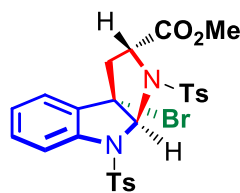

**4n** (*dr* 95:5)

**8n** was prepared from (S)-methyl 2-(4-methylphenylsulfonamido)-3-(1-tosyl-1H-indol-3-yl)propanoate **6n** (52.6 mg, 0.1 mmol), following general procedure A using a constant current of 5.0 mA (4.5 mA/cm<sup>2</sup>) and 18.4 mg of MgBr<sub>2</sub> (0.1 mmol). After stirring 65 minutes at room temperature (2.02 F/mol) followed by aqueous work-up, preparative TLC purification (PE/EtOAc 6:4) led to **8n** (31 mg, 0.051 mmol, **51%**, 95:5 *dr* in favor of the *exo* isomer) as colorless solid.

**8n** was prepared from (S)-methyl 2-(4-methylphenylsulfonamido)-3-(1-tosyl-1H-indol-3-yl)propanoate **6n** (52.6 mg, 0.1 mmol), following general procedure A using a constant cell potential of 5 V. After stirring 111 minutes at room temperature, the solution was charged to 3.69 F/mol followed by aqueous work-up, preparative TLC purification (PE/EtOAc 6:4) led to **8n** (33 mg, 0.055 mmol, **55%**, 95:5 *dr* in favor of the *exo* isomer) as colorless solid.

**Rf:** 0.53 (PE/EtOAc 6:4). [ $\alpha$ ]<sub>D</sub><sup>25</sup> = +215.7 (*c* = 0.5, CHCl<sub>3</sub>).

**<sup>1</sup>H NMR:** (300 MHz, CDCl<sub>3</sub>, 300 K) δ (ppm) 7.75 (d, *J* = 8.3 Hz, 2H), 7.50 (d, *J* = 8.4 Hz, 2H), 7.19 (d, *J* = 8.1 Hz, 2H), 7.15-7.03 (m, 6H), 6.24 (s, 1H), 3.84 (dd, *J* = 8.9 Hz, *J* = 6.3 Hz, 1H), 3.80 (s, 3H), 3.05 (dd, *J* = 12.6 Hz, *J* = 6.2 Hz, 1H), 2.88 (dd, *J* = 13.0 Hz, *J* = 9.4 Hz, 1H), 2.39 (s, 3H), 2.26 (s, 3H).

**<sup>13</sup>C NMR:** (75 MHz, CDCl<sub>3</sub>, 300 K) δ (ppm) 170.8, 144.8, 143.6, 139.5, 136.8, 135.4, 134.2, 130.6, 129.5, 129.3, 128.2, 128.1, 126.9, 123.5, 118.9, 87.9, 61.6, 59.1, 53.1, 43.2, 21.6 (two C).

**HRMS-ESI:** *m/z* 627.0212 ([M+Na]<sup>+</sup>, C<sub>26</sub>H<sub>25</sub>BrN<sub>2</sub>NaO<sub>6</sub>S<sub>2</sub><sup>+</sup> calcd. 627.0230).

**1-(tert-butyl)-2-methyl-(2R,3aS,8aS)-1-tert-butyl-2-methyl-3a-bromo-8-(phenylsulfonyl)-3,3a,8,8a-tetrahydropyrrolo[2,3-b]indole-1,2(2H)-dicarboxylate (8o):**

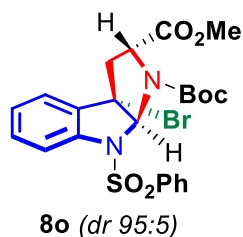

To a 20 mL vial with a stir bar were successively added **6o** (0.6 mmol), MgBr<sub>2</sub> (0.6 mmol, 1.0 equiv), 3.0 mL of distilled H<sub>2</sub>O and 12.0 mL of CH<sub>3</sub>CN (0.04 M). The vial was covered with the electrode holder. The electrolysis was carried out at room temperature **using a constant current of 5.0 mA (1.8 mA/cm<sup>2</sup>)** between a graphite anode and a platinum plate cathode (0.8 cm x 3.4 cm x 0.2 cm submerged in solution) with stirring (1000 rpm). The complete consumption of the starting indole derivative was checked by TLC (15% AcOEt/petroleum ether). After stirring 385 minutes at room temperature (2.00 F/mol) followed by aqueous work-up, preparative TLC purification (PE/EtOAc 75:25) led to **8o** (260 mg, 0.486 mmol, **81%**, dr 95:5 in favor of the *exo* isomer) as white foam.

To a 20 mL vial with a stir bar were successively added **6o** (0.6 mmol), MgBr<sub>2</sub> (0.6 mmol, 1.0 equiv), 3.0 mL of distilled H<sub>2</sub>O and 12.0 mL of CH<sub>3</sub>CN (0.04 M). The vial was covered with a screw-cap. The electrolysis was carried out at room temperature **using a constant cell potential of 5 V** between a graphite anode and a platinum plate cathode (0.8 cm x 3.4 cm x 0.2 cm submerged in solution) with stirring (1000 rpm). The complete consumption of the starting indole derivative was checked by TLC (15% AcOEt/petroleum ether). After stirring 120 minutes at room temperature (2.95 F/mol) followed by aqueous work-up, preparative TLC purification (PE/EtOAc 75:25) led to **8o** (270 mg, 0.504 mmol, **84%**, dr 95:5 in favor of the *exo* isomer) as white foam.

**Rf**: 0.33 (PE/EtOAc 3:1). [ $\alpha$ ]<sub>D</sub><sup>25</sup> = +232.8 (c = 0.15, CHCl<sub>3</sub>).

**<sup>1</sup>H NMR**: (300 MHz, CDCl<sub>3</sub>, 300 K)  $\delta$  (ppm) 7.89-7.70 (m, 2H), 7.56 (d, *J* = 7.9 Hz, 1H), 7.45 (t, *J* = 7.3 Hz, 1H), 7.36-7.24 (m, 4H), 7.16 (t, *J* = 7.5 Hz, 1H), 6.30 (s, 1H), 3.81 (dd, *J* = 10.4 Hz, *J* = 5.8 Hz, 1H), 3.72 (s, 3H), 3.06 (dd, *J* = 12.6 Hz, *J* = 6.0 Hz, 1H), 2.75 (t, *J* = 11.6 Hz, 1H), 1.53 (br, 9H).

**<sup>13</sup>C NMR**: (75 MHz, CDCl<sub>3</sub>, 300 K)  $\delta$  (ppm) 171.0, 153.3, 140.5, 138.5, 134.2, 133.6, 131.1, 128.8, 128.5, 126.5, 124.0, 118.9, 86.8, 83.0, 59.6, 59.5, 52.6, 43.2, 28.4.

**HRMS-ESI**: *m/z* 537.0672 ([M+H]<sup>+</sup>, C<sub>23</sub>H<sub>26</sub>BrN<sub>2</sub>O<sub>6</sub>S<sup>+</sup> calcd. 537.0689).

### 3a-allyl-8-tosyl-3,3a,8,8a-tetrahydro-2H-furo[2,3-b]indole (**9**)

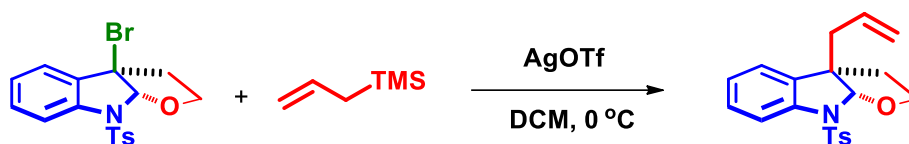

Bromopyrroloindoline **7c** (78.6 mg, 0.2 mmol) was dried under reduced pressure and placed under an argon atmosphere. Anhydrous CH<sub>2</sub>Cl<sub>2</sub> (200  $\mu$ L) and allyltrimethylsilane (95  $\mu$ L, 0.6 mmol) were added. The solution was cooled to 0 °C and poured into a stirred suspension of AgOTf (77.1 mg, 0.3 mmol) in CH<sub>2</sub>Cl<sub>2</sub> (100  $\mu$ L) via cannula at 0 °C. After stirring at the same temperature for

30 min, the reaction was quenched with saturated aqueous NaHCO<sub>3</sub> and the resulting mixture was extracted with CH<sub>2</sub>Cl<sub>2</sub> five times. The combined organic extracts were dried over MgSO<sub>4</sub>, filtered through a pad of Celite, and concentrated under reduced pressure. The residue was purified by flash column chromatography on silica gel (hexanes/EtOAc = 4/1) to afford allylpyrroloindoline **9** (40 mg, 0.112 mmol, **56%**, 95:5 dr) as colorless solid.

**Rf:** 0.49 (PE/EtOAc 4:1).

**<sup>1</sup>H NMR:** (300 MHz, CDCl<sub>3</sub>, 300 K) δ (ppm) 7.83 (d, *J* = 8.4 Hz, 2H), 7.44 (d, *J* = 8.1 Hz, 1H), 7.25-7.17 (m, 3H), 7.10 (dd, *J* = 7.6 Hz, *J* = 1.4 Hz, 1H), 7.01 (td, *J* = 7.4 Hz, *J* = 1.0 Hz, 1H), 5.82 (s, 1H), 5.39-5.28 (m, 1H), 4.93 (d, *J* = 16.7 Hz, 1H), 4.85 (d, *J* = 10.3 Hz, 1H), 3.98 (t, *J* = 8.0 Hz, 1H), 3.43-3.36 (m, 1H), 2.46-2.39 (m, 1H), 2.37 (s, 3H), 2.34-2.28 (m, 1H), 2.19-2.10 (m, 1H), 2.06-2.01 (m, 1H).

**<sup>13</sup>C NMR:** (75 MHz, CDCl<sub>3</sub>, 300 K) δ (ppm) 144.1, 141.8, 136.5, 134.2, 132.8, 129.6, 128.7, 127.5, 124.1, 123.8, 119.1, 113.2, 99.3, 67.6, 56.7, 42.4, 39.5, 21.6.

**HRMS-ESI:** *m/z* 378.1118 ([M+Na]<sup>+</sup>, C<sub>20</sub>H<sub>21</sub>NNaO<sub>3</sub>S<sup>+</sup> calcd. 378.1134).

**1-(tert-butyl)-2-methyl-(2*S*,3*aS*,8*aS*)-1-tert-butyl-2-methyl-3*a*-(1*H*-indol-3-yl)-8-(phenylsulfonyl)-3,3*a*,8,8*a*-tetrahydropyrrolo[2,3-*b*]indole-1,2(2*H*)-dicarboxylate (**10**):**

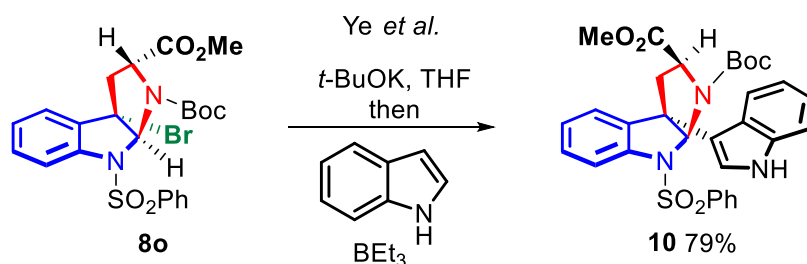

As described by Ye:<sup>2</sup> To a solution of indole (23.4mg, 0.2 mmol) and bromopyrroloindoline **8o** (192 mg, 1.8 equiv) in THF (0.05 M based on indole) at 0 °C was added triethylborane (1.5 equiv), which was followed by dropwise addition of a solution of potassium tert-butoxide in THF (3.5 equiv, 1 M solution). The reaction mixture was stirred at 0 °C. After complete consumption of starting material was observed by TLC analysis, the reaction was quenched by addition of saturated aqueous solution of NH<sub>4</sub>Cl and diluted with ethyl acetate. Layers were separated. The organic phase was washed with brine, dried over anhydrous Na<sub>2</sub>SO<sub>4</sub> and concentrated under reduced pressure. Preparative TLC purification (PE/EtOAc 65:35) led to **10** (90 mg, 0.158 mmol, **79%**, dr 95:5 in favor of the *endo* isomer) as white solid.

**Rf:** 0.27 (PE/EtOAc 65:35). [α]<sub>D</sub><sup>25</sup> = -70.1 (c = 0.1, CHCl<sub>3</sub>).

**<sup>1</sup>H NMR:** (300 MHz, CDCl<sub>3</sub>, 300 K) δ (ppm) 7.84 (br, 1H), 7.58 (br, 1H), 7.47 (d, *J* = 7.8 Hz, 1H), 7.35-7.26 (m, 5H), 7.24-7.19 (m, 2H), 7.17-7.09 (m, 2H), 6.99 (t, *J* = 7.6 Hz, 2H), 6.59 (s, 1H), 6.00 (s, 1H), 5.02-4.67 (m, 1H), 3.25-3.06 (m, 4H), 2.78 (d, *J* = 13.2 Hz, 1H), 1.52 (br, 9H).

**<sup>13</sup>C NMR:** (75 MHz, CDCl<sub>3</sub>, 300 K) δ (ppm) 171.8, 154.2, 142.3, 139.5, 137.2, 135.3, 132.3, 129.4, 128.2, 126.8, 125.1, 124.9, 124.4, 123.3, 122.7, 120.3, 119.0, 118.4, 116.0, 111.9, 84.7, 82.6, 60.2, 57.1, 52.1, 40.3, 28.5.

**HRMS-ESI:** *m/z* 596.1807 ([M+Na]<sup>+</sup>, C<sub>31</sub>H<sub>31</sub>N<sub>3</sub>NaO<sub>6</sub>S<sup>+</sup> calcd. 596.1826).

<sup>2</sup> H. Lei, L. Wang, Z. Xu, T. Ye, *Org. Lett.* **2017**, *19*, 5134–5137.

The spectral data matched the reported data by Ye.<sup>2</sup>

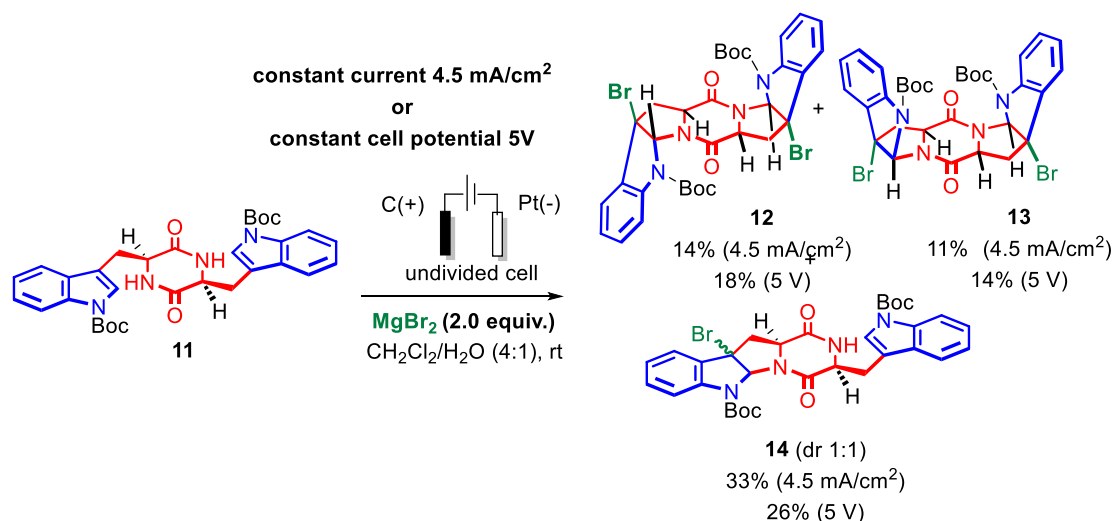

To a 10 mL vial with a stir bar were successively added bis(tryptophan) diketopiperazine **11** (57.2 mg, 0.1 mmol, prepared according to Tokuyama<sup>3</sup>), MgBr<sub>2</sub> (0.2 mmol, 2.0 equiv), 1.0 mL of distilled H<sub>2</sub>O and 4.0 mL of CH<sub>2</sub>Cl<sub>2</sub> (0.02 M). The vial was covered with a screw-cap. The electrolysis was carried out at room temperature **using a constant cell potential of 5 V** between a graphite anode and a platinum plate cathode (1.4 x 0.8 x 0.2 cm submerged in solution) with stirring (400 rpm). The complete consumption of the starting indole derivative was checked by TLC (30% to 50% toluene/AcOEt). The reaction was then quenched with H<sub>2</sub>O and diluted with CH<sub>2</sub>Cl<sub>2</sub>. The organic and aqueous phases were separated. The aqueous phase was then extracted twice with CH<sub>2</sub>Cl<sub>2</sub>. The combined organic phases were then dried over MgSO<sub>4</sub>, filtered and concentrated under vacuum. The crude was then purified by preparative TLC (8:2 to 7:3 toluene/AcOEt) and led to **12** (13 mg, 0.018 mmol, **18%**) as white solid, to **13** (10 mg, 0.014 mmol, **14%**) as white solid and to **14** (17 mg, 0.026 mmol, **26%**, dr 50:50) as white foam.

To a 10 mL vial with a stir bar were successively added bis(tryptophan) diketopiperazine **11** (57.2 mg, 0.1 mmol), MgBr<sub>2</sub> (0.2 mmol, 2.0 equiv), 1.0 mL of distilled H<sub>2</sub>O and 4.0 mL of CH<sub>2</sub>Cl<sub>2</sub> (0.02 M). The vial was covered with the electrode holder. The electrolysis was carried out at room temperature **using a constant current of 5.0 mA (4.5 mA/cm<sup>2</sup>)** between a graphite anode and a platinum plate cathode (1.4 x 0.8 x 0.2 cm submerged in solution) with stirring (1000 rpm). The complete consumption of the starting indole derivative was checked by TLC (30% to 50% toluene/AcOEt). The reaction was then quenched with H<sub>2</sub>O and diluted with CH<sub>2</sub>Cl<sub>2</sub>. The organic and aqueous phases were separated. The aqueous phase was then extracted twice with CH<sub>2</sub>Cl<sub>2</sub>. The combined organic phases were then dried over MgSO<sub>4</sub>, filtered and concentrated under vacuum. The crude was then purified by preparative TLC (8:2 to 7:3 toluene/AcOEt) and led to **12** (11 mg, 0.014 mmol, **14%**) as white solid, to **13** (8 mg, 0.011 mmol, **11%**) as white solid and to **14** (21 mg, 0.033 mmol, **33%**, dr 50:50) as white foam.

### Bis-bromopyrroloindoline 8:

<sup>3</sup> Hakamata, H.; Sato, S.; Ueda, H.; Tokuyama, H. *Org. Lett.* **2017**, *19*, 5308–5311.

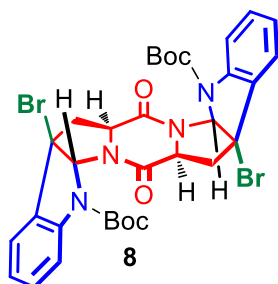

**Rf:** 0.45 (toluene/EtOAc 85:15).  $[\alpha]_D^{25} = -70.2$  ( $c = 0.2$ ,  $\text{CHCl}_3$ ).

**$^1\text{H}$  NMR:** (300 MHz,  $\text{CDCl}_3$ , 300 K)  $\delta$  (ppm) 7.66 (d,  $J = 8.2$  Hz, 1H), 7.63 (d,  $J = 7.1$  Hz, 1H), 7.45 (d,  $J = 7.5$  Hz, 1H), 7.36-7.30 (m, 3H), 7.11 (t,  $J = 7.5$  Hz, 2H), 6.24 (s, 1H), 6.15 (s, 1H), 4.26 (dd,  $J = 9.7$  Hz,  $J = 4.1$  Hz, 1H), 3.82 (dd,  $J = 10.3$  Hz,  $J = 5.9$  Hz, 1H), 3.75 (dd,  $J = 14.3$  Hz,  $J = 4.2$  Hz, 1H), 3.25 (dd,  $J = 13.5$  Hz,  $J = 6.2$  Hz, 1H), 3.05 (dd,  $J = 14.3$  Hz,  $J = 10.1$  Hz, 1H), 2.86 (dd,  $J = 13.2$  Hz,  $J = 10.4$  Hz, 1H), 1.63 (s, 9H), 1.56 (s, 9H).

**$^{13}\text{C}$  NMR:** (75 MHz,  $\text{CDCl}_3$ , 300 K)  $\delta$  (ppm) 164.7, 163.5, 151.8, 151.6, 141.7, 139.9, 133.0, 131.8, 131.1, 130.9, 124.9, 124.7, 124.5, 123.6, 117.7, 117.1, 85.0, 83.1, 82.9, 82.8, 60.4, 60.2, 58.9, 58.8, 42.3, 38.2, 28.4, 28.2.

**HRMS-ESI:**  $m/z$  753.0703 ( $[\text{M}+\text{Na}]^+$ ,  $\text{C}_{32}\text{H}_{34}\text{Br}_2\text{N}_4\text{NaO}_6^+$  calcd. 753.0717).

The spectral data matched the reported data by Tokuyama.<sup>3</sup>

#### Bis-bromopyrroloindoline 9:

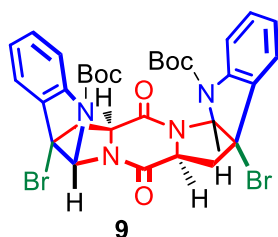

**Rf:** 0.28 (toluene/EtOAc 2:1).  $[\alpha]_D^{25} = +166.8$  ( $c = 0.2$ ,  $\text{CHCl}_3$ ).

**$^1\text{H}$  NMR:** (300 MHz,  $\text{CDCl}_3$ , 300 K)  $\delta$  (ppm) 7.31 (d,  $J = 7.6$  Hz, 2H), 7.20 (d,  $J = 8.0$  Hz,  $J = 7.6$  Hz, 2H), 7.04-6.98 (m, 4H), 6.07 (s, 2H), 4.21 (dd,  $J = 10.4$  Hz,  $J = 2.0$  Hz, 2H), 3.82 (dd,  $J = 13.7$  Hz,  $J = 1.6$  Hz, 2H), 2.96 (dd,  $J = 13.8$  Hz,  $J = 10.3$  Hz, 2H), 1.56 (s, 18H).

**$^{13}\text{C}$  NMR:** (75 MHz,  $\text{CDCl}_3$ , 300 K)  $\delta$  (ppm) 164.2, 151.4, 139.2, 131.4, 130.8, 124.6, 123.7, 117.4, 83.9, 82.4, 60.7, 60.1, 36.4, 28.3.

**HRMS-ESI:**  $m/z$  753.0693 ( $[\text{M}+\text{Na}]^+$ ,  $\text{C}_{32}\text{H}_{34}\text{Br}_2\text{N}_4\text{NaO}_6^+$  calcd. 753.0717).

The spectral data matched the reported data by Tokuyama.<sup>3</sup>

#### Mono-bromopyrroloindoline product (10):



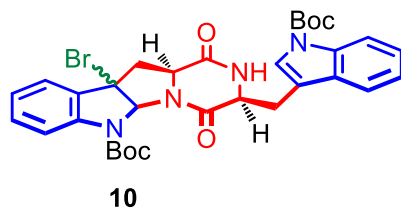

*Data for the mixture of diastereoisomers (dr 50:50).*

**Rf:** 0.31 (toluene/EtOAc 2:1).

**<sup>1</sup>H NMR:** (300 MHz, CDCl<sub>3</sub>, 300 K) δ (ppm) 8.14 (t, *J* = 8.7 Hz, 1H), 7.69 (d, *J* = 8.2 Hz, 0.5H), 7.62 (d, *J* = 8.2 Hz, 0.5H), 7.49-7.27 (m, 5H), 7.22 (t, *J* = 7.4 Hz, 1H), 7.12 (t, *J* = 7.2 Hz, 0.5H), 7.08 (t, *J* = 7.4 Hz, 0.5H), 6.62 (s, 0.5H), 6.34 (s, 0.5H), 5.85 (s, 0.5H), 5.50 (s, 0.5H), 4.36-4.31 (m, 1H), 4.21 (dd, *J* = 10.9 Hz, *J* = 3.5 Hz, 0.5H), 3.84 (dd, *J* = 11.4 Hz, *J* = 5.4 Hz, 0.5H), 3.68 (dd, *J* = 14.3 Hz, *J* = 3.8 Hz, 0.5H), 3.64 (dd, *J* = 10.2 Hz, *J* = 2.7 Hz, 0.5H), 3.58 (dd, *J* = 15.1 Hz, *J* = 2.5 Hz, 0.5H), 3.24 (dd, *J* = 12.8 Hz, *J* = 5.6 Hz, 0.5H), 3.11 (dd, *J* = 14.6 Hz, *J* = 10.1 Hz, 0.5H), 2.99 (dd, *J* = 14.7 Hz, *J* = 10.3 Hz, 0.5H), 2.78-2.68 (m, 1H), 1.68 (s, 9H), 1.65 (s, 9H).

**<sup>13</sup>C NMR:** (75 MHz, CDCl<sub>3</sub>, 300 K) δ (ppm) 167.9, 166.8, 165.8, 164.1, 151.9, 151.8, 149.4, 142.1, 140.0, 135.9, 132.9, 131.5, 131.1, 130.8, 129.4, 125.2, 124.9, 124.7, 124.6, 124.5, 124.0, 122.9, 118.9, 118.7, 117.3, 117.2, 115.8, 114.5, 114.3, 85.0, 84.3, 84.2, 83.8, 83.0, 82.9, 60.2, 58.9, 58.5, 57.9, 54.26, 54.21, 45.1, 38.1, 28.5, 28.32, 28.30, 27.3, 25.8.

**HRMS-ESI:** *m/z* 673.1599 ([M+Na]<sup>+</sup>, C<sub>32</sub>H<sub>35</sub>BrN<sub>4</sub>NaO<sub>6</sub><sup>+</sup> calcd. 673.1632).

The spectral data matched the reported data by Tokuyama.<sup>3</sup>

## 6. NMR spectra

$^1\text{H}$  NMR ( $\text{CDCl}_3$ , 300K), **6i**

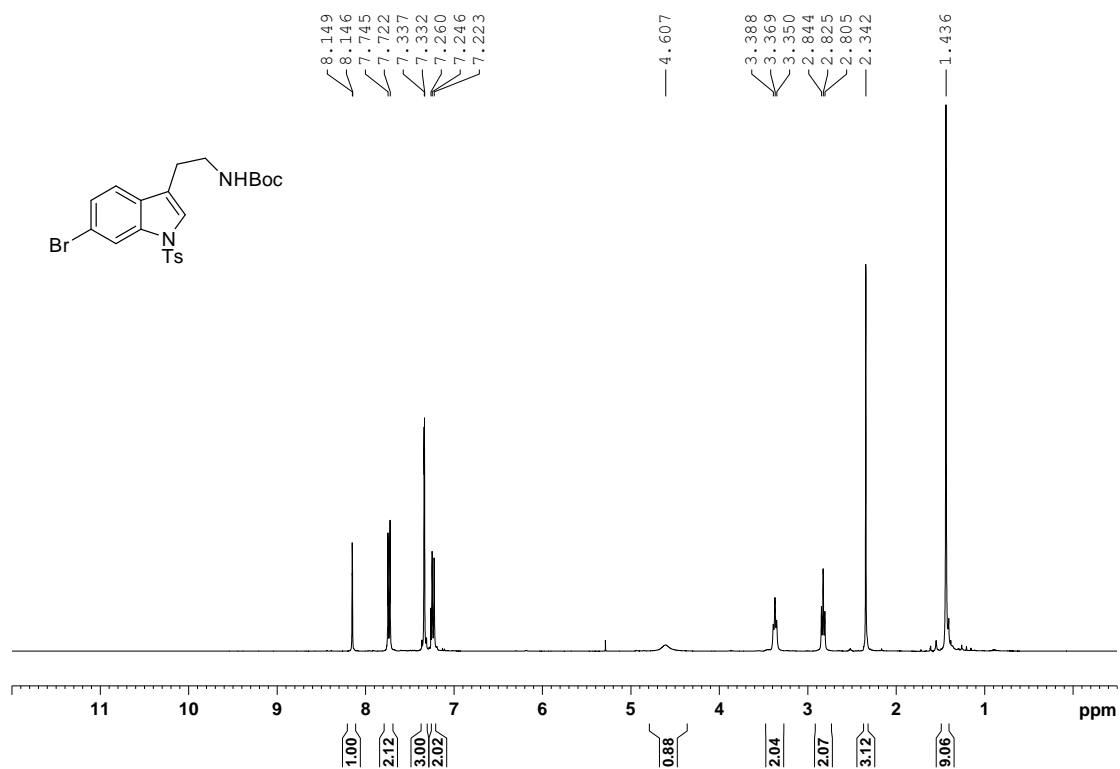

$^{13}\text{C}$  NMR ( $\text{CDCl}_3$ , 300K), **6i**

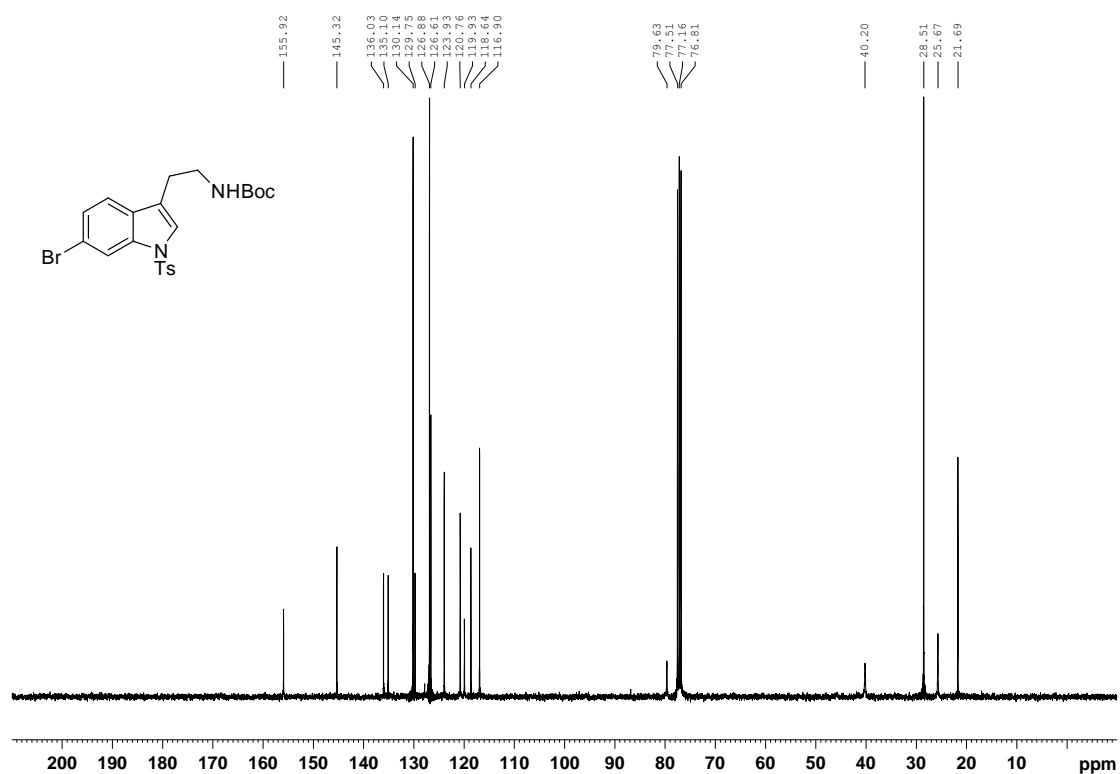

$^1\text{H}$  NMR ( $\text{CDCl}_3$ , 300K), **7a**

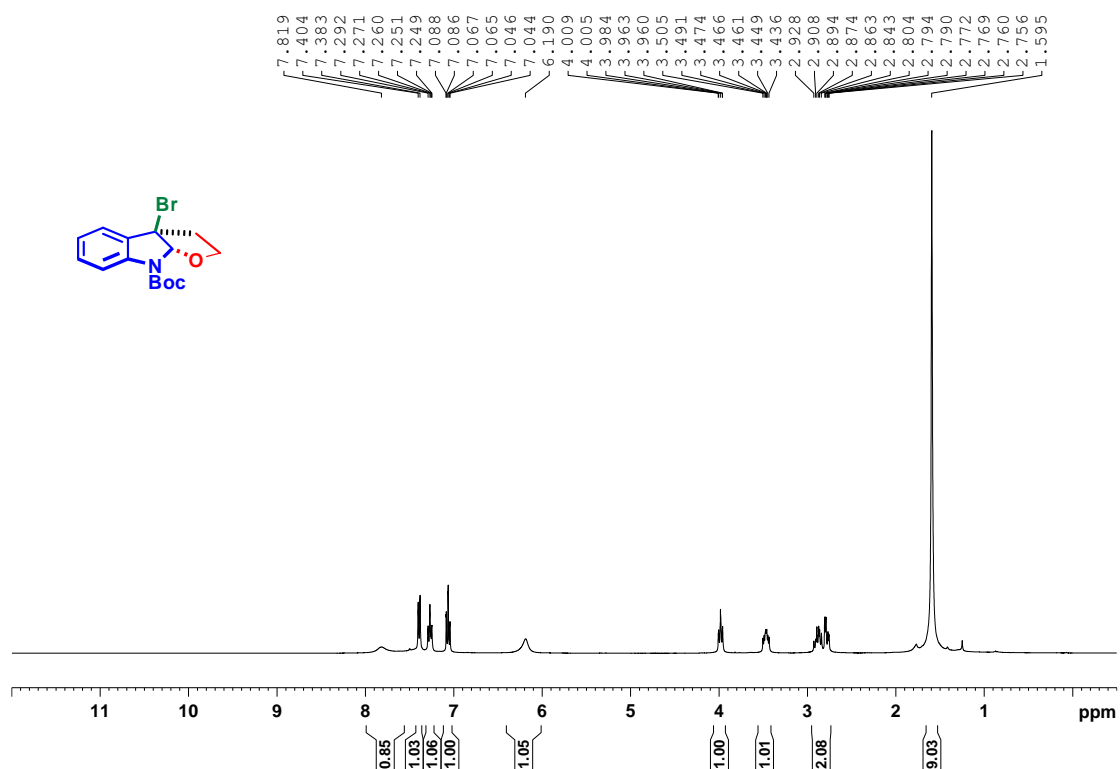

$^{13}\text{C}$  NMR ( $\text{CDCl}_3$ , 300K), **7a**

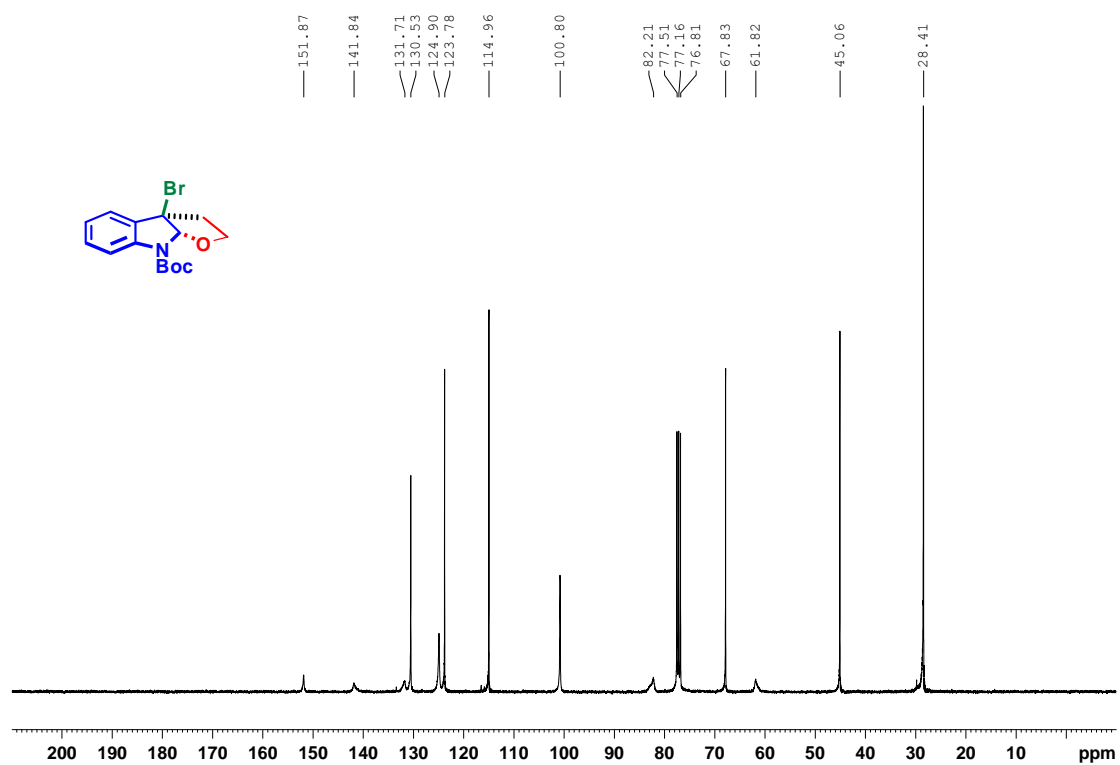

<sup>1</sup>H NMR (CDCl<sub>3</sub>, 300K), **7b**

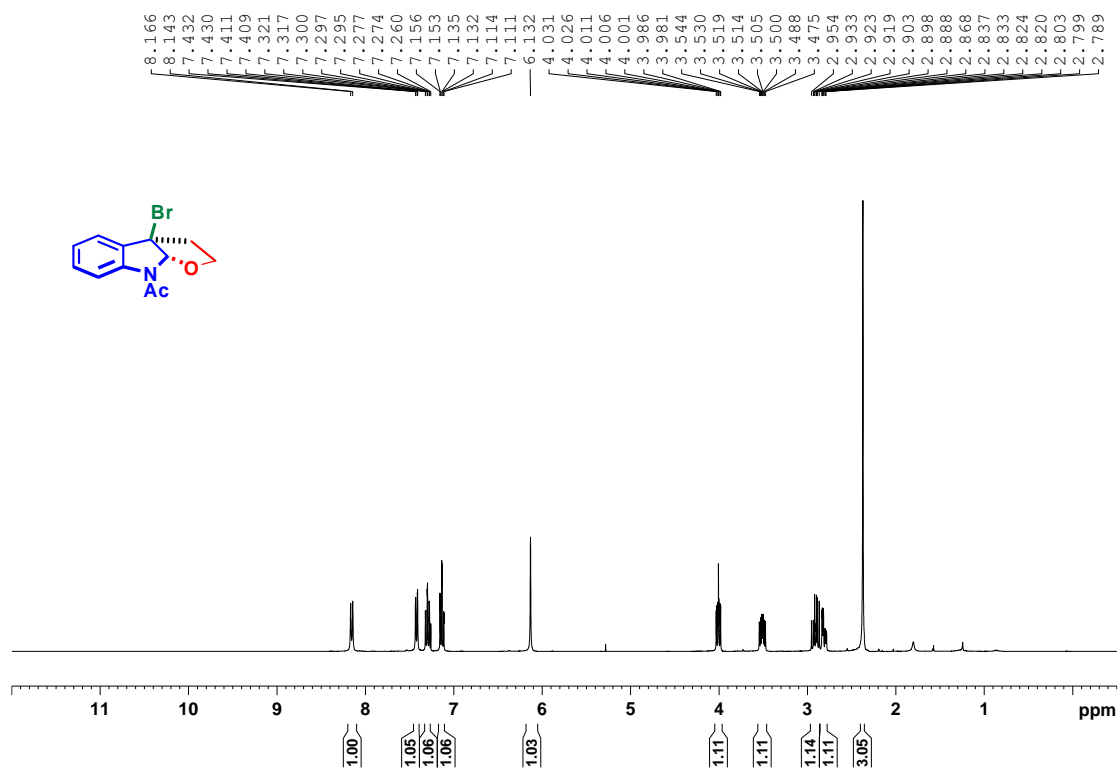

<sup>13</sup>C NMR (CDCl<sub>3</sub>, 300K), **7b**

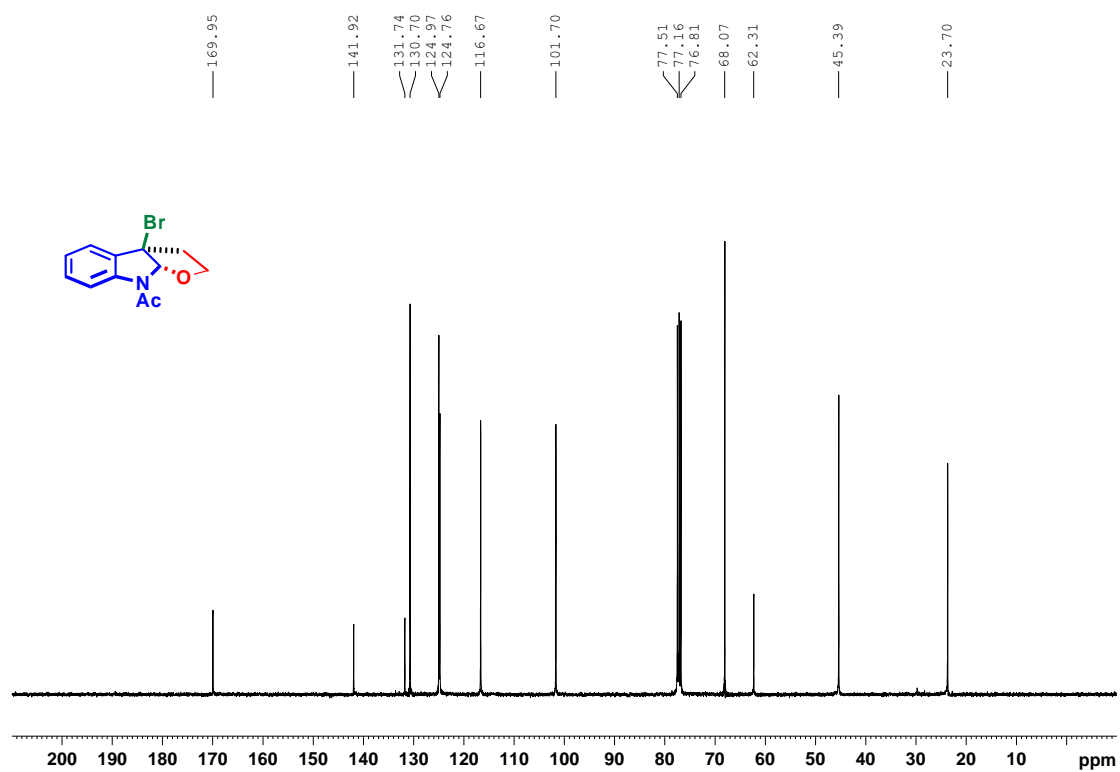

$^1\text{H}$  NMR ( $\text{CDCl}_3$ , 300K), **7c**

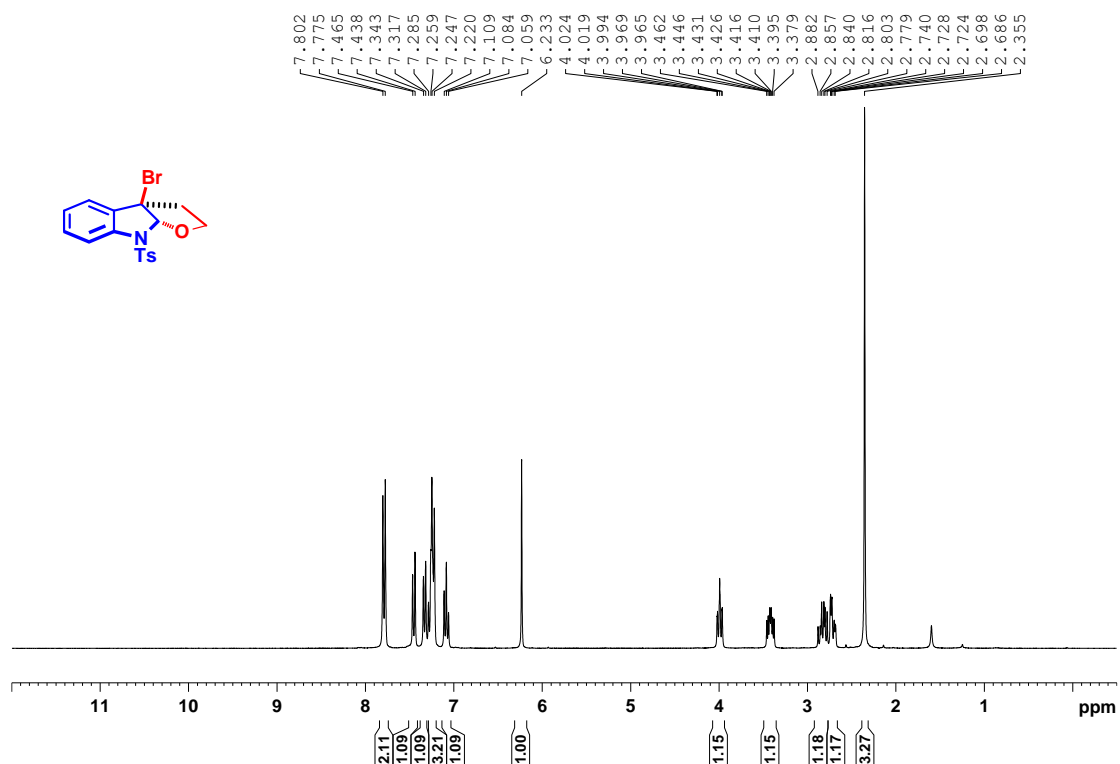

$^{13}\text{C}$  NMR ( $\text{CDCl}_3$ , 300K), **7c**

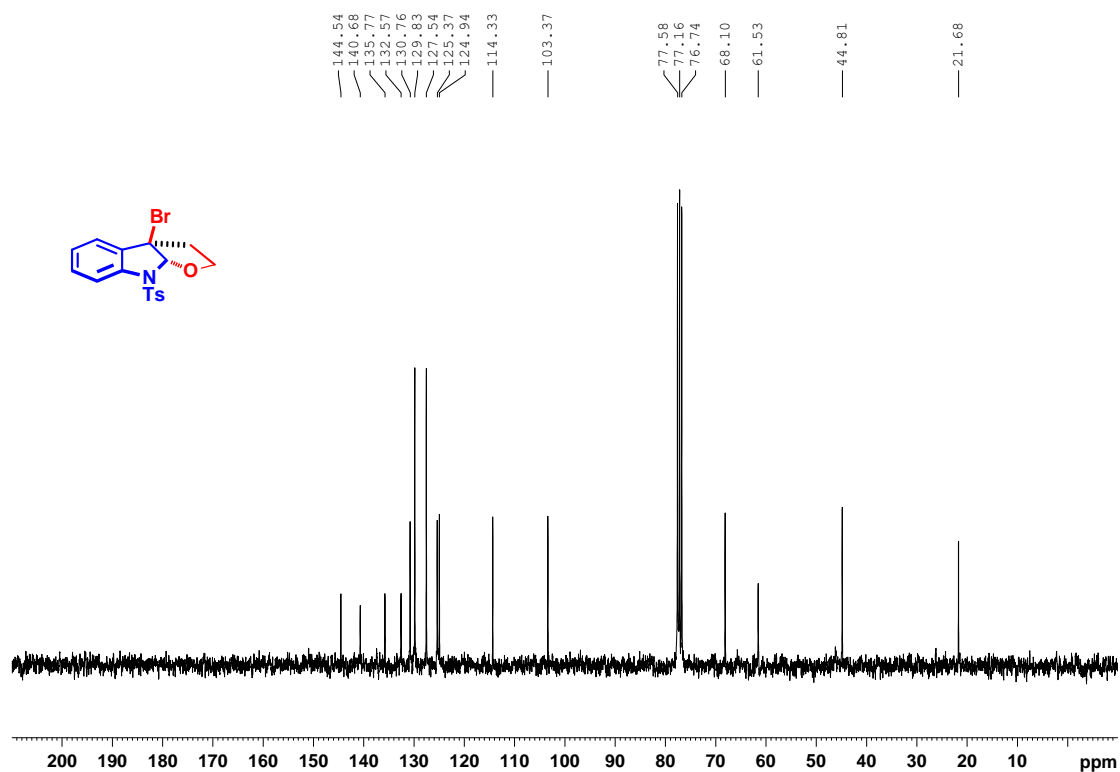

<sup>1</sup>H NMR (CDCl<sub>3</sub>, 300K), **7d**

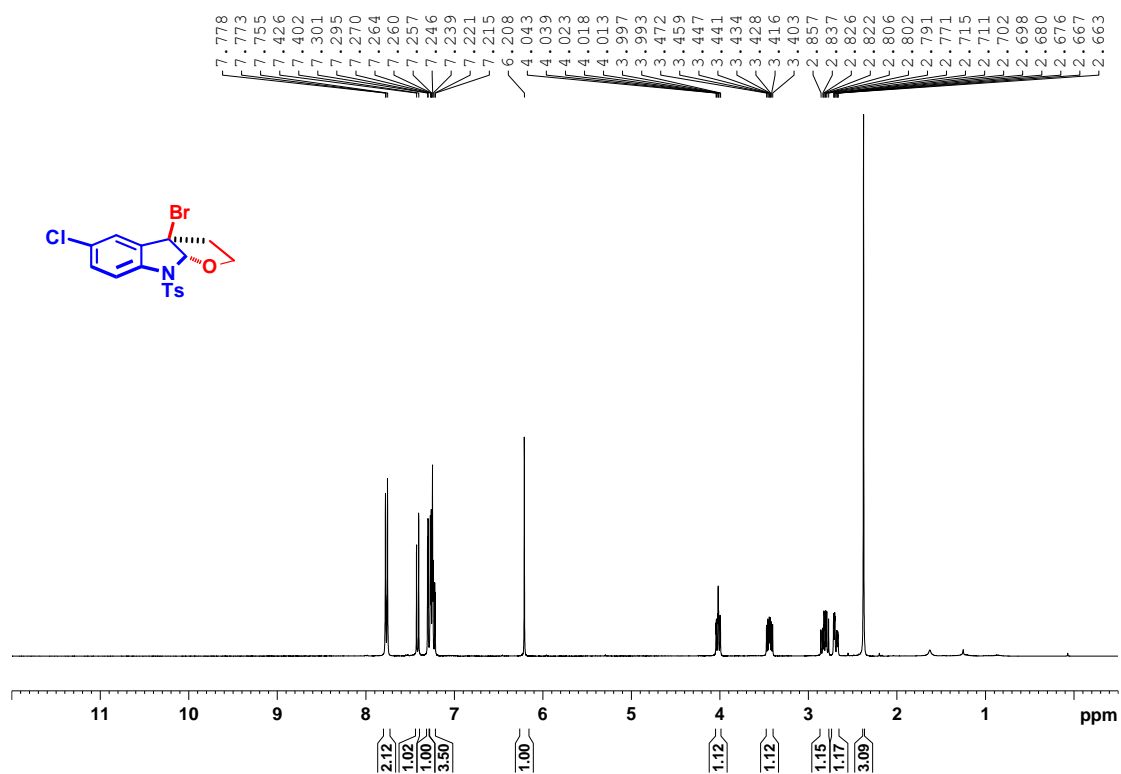

<sup>13</sup>C NMR (CDCl<sub>3</sub>, 300K), **7d**

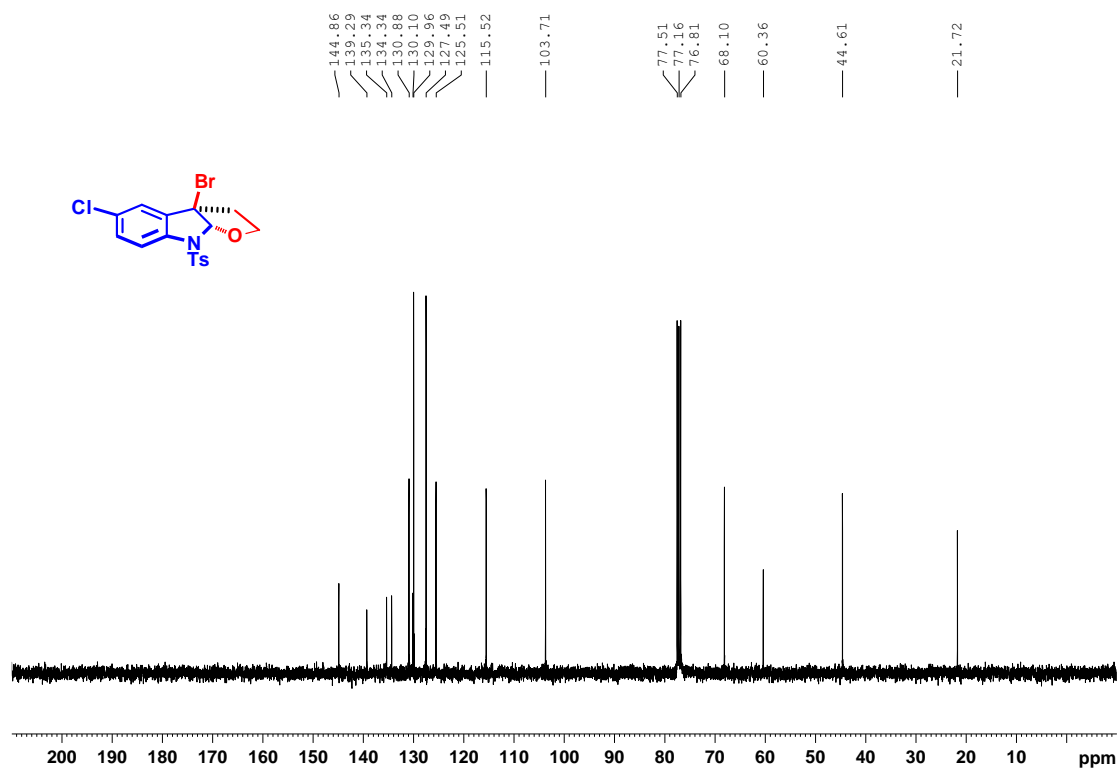

$^1\text{H}$  NMR ( $\text{CDCl}_3$ , 300K), **7e**

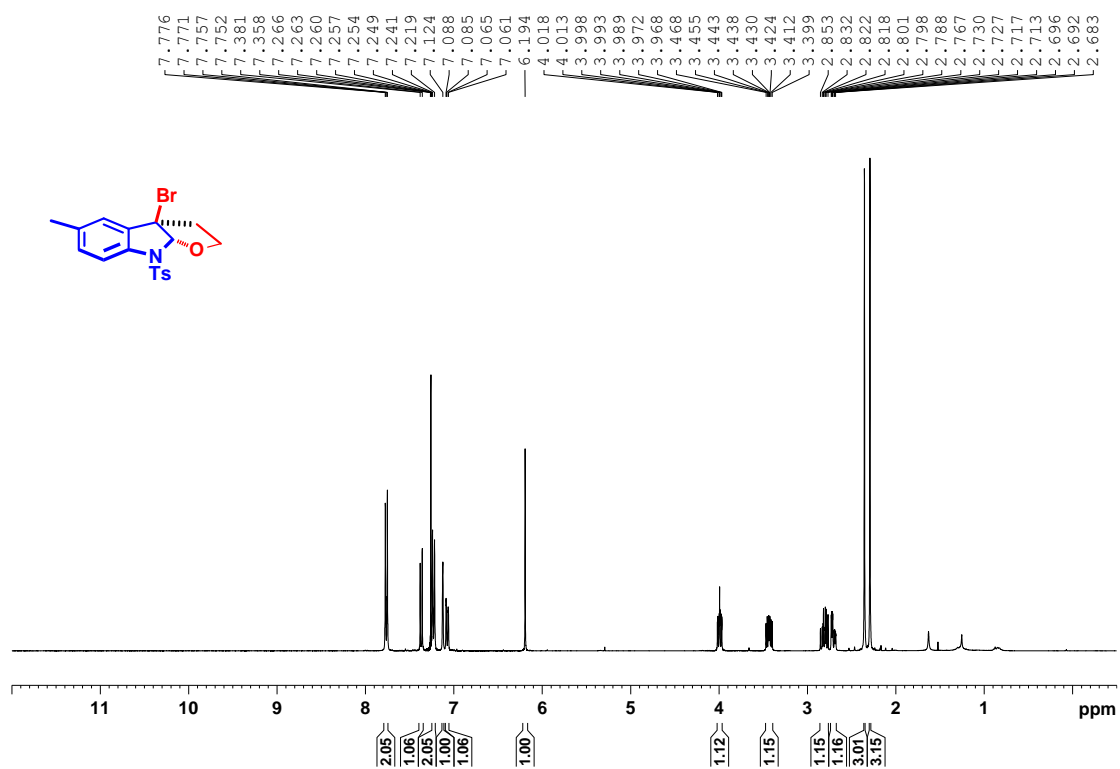

$^{13}\text{C}$  NMR ( $\text{CDCl}_3$ , 300K), **7e**

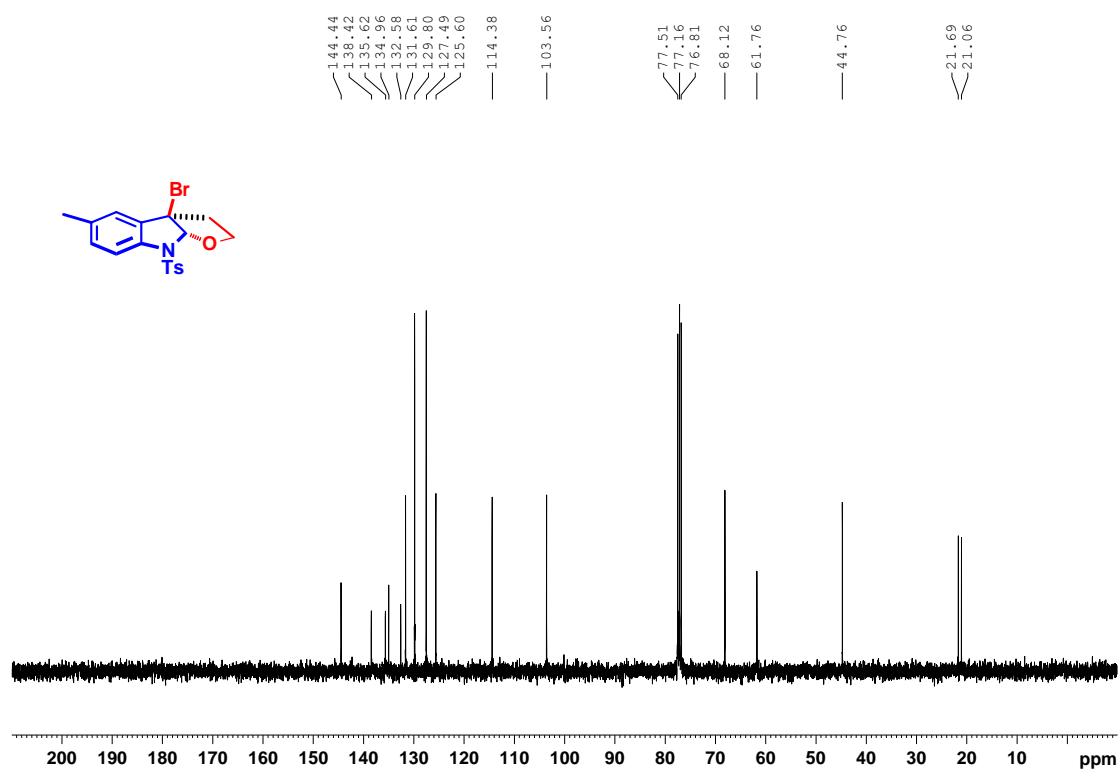

$^1\text{H}$  NMR ( $\text{CDCl}_3$ , 300K), **7f**

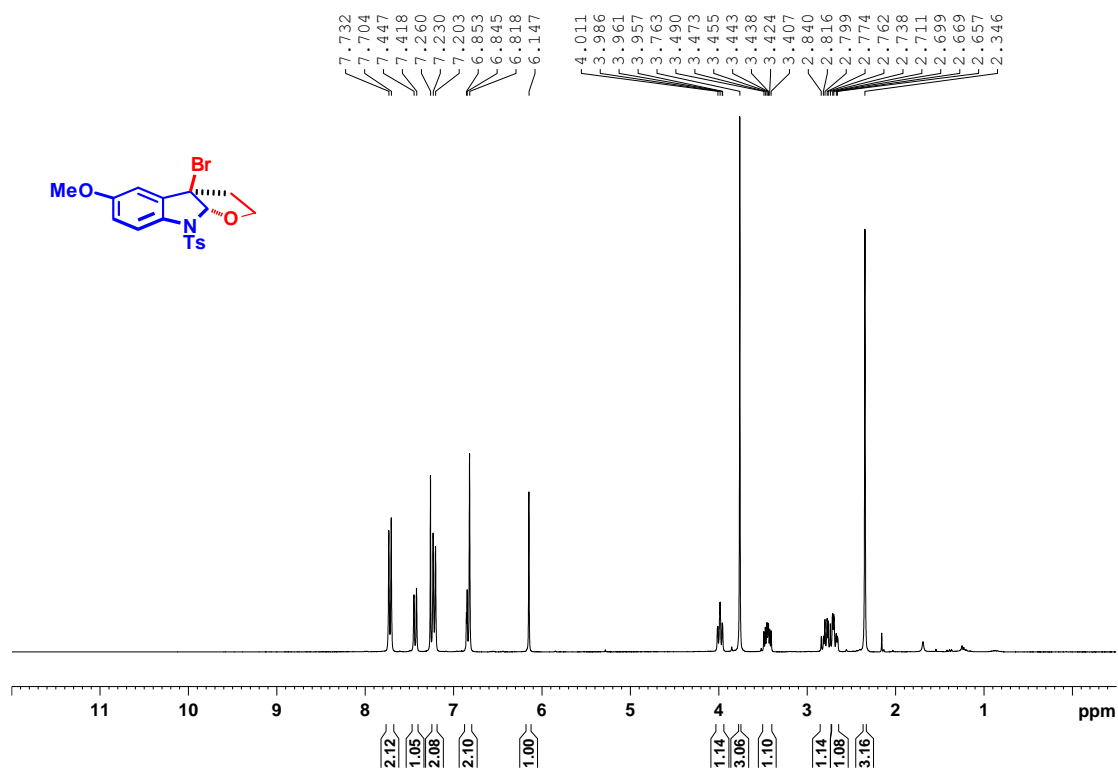

$^{13}\text{C}$  NMR ( $\text{CDCl}_3$ , 300K), **7f**

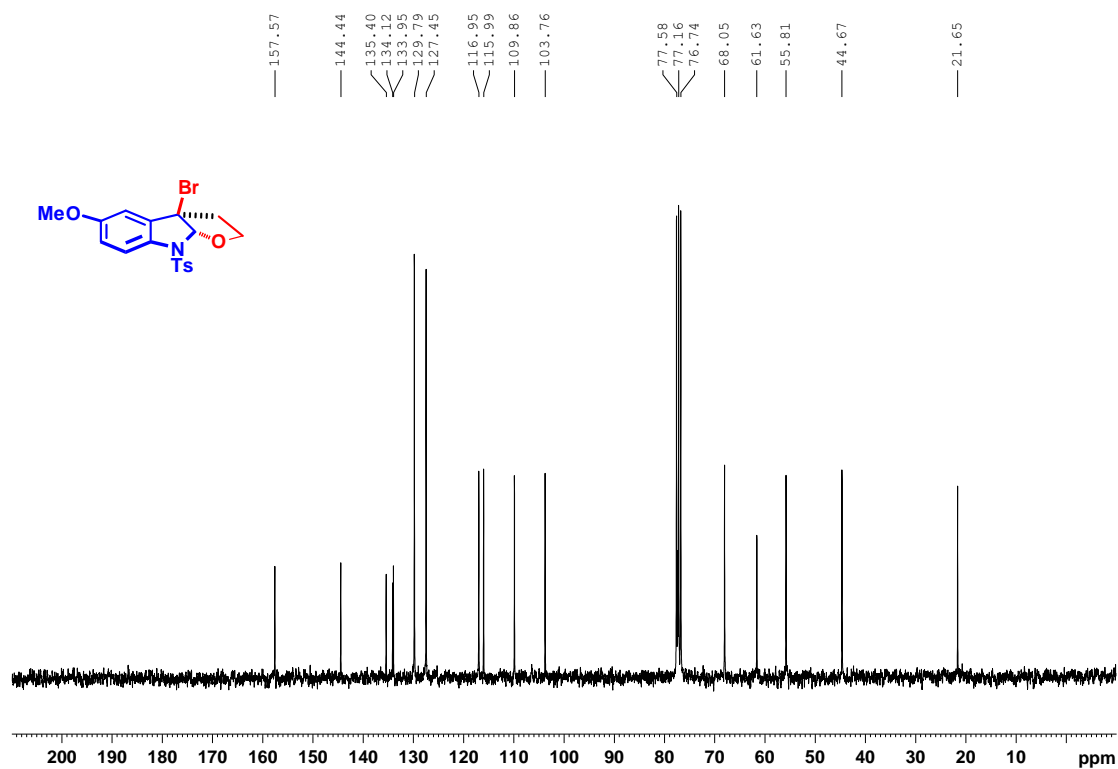



$^1\text{H}$  NMR ( $\text{CDCl}_3$ , 300K), **7g**

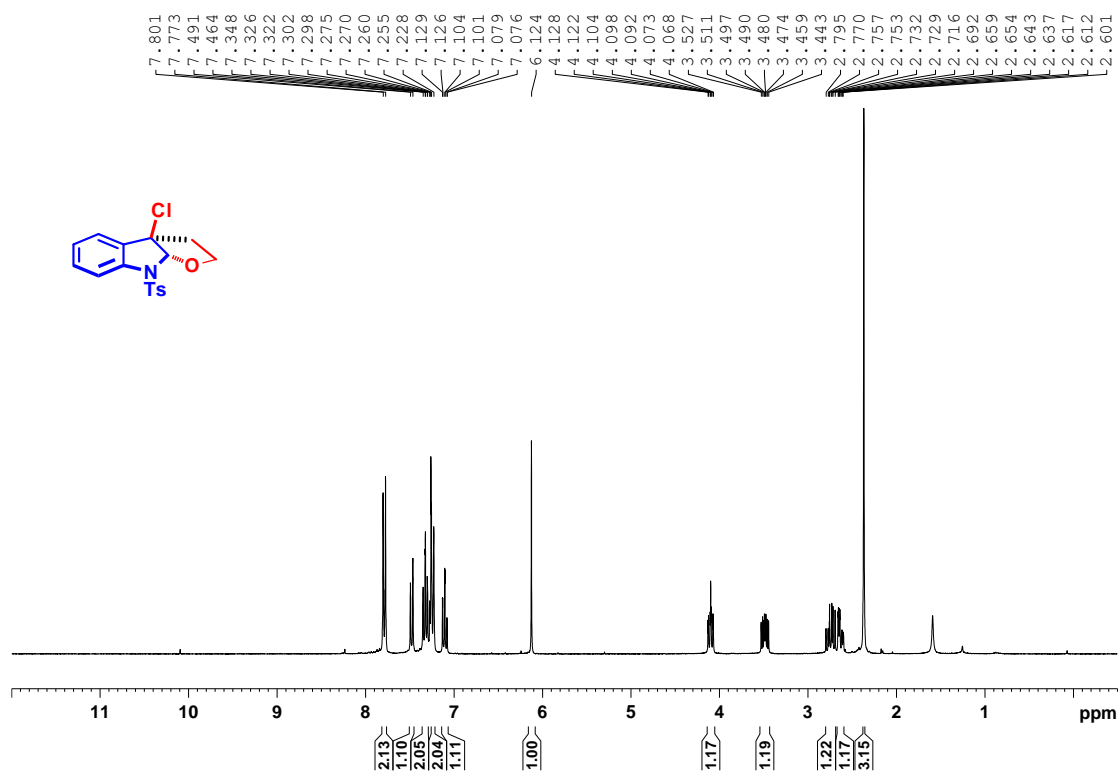

$^{13}\text{C}$  NMR ( $\text{CDCl}_3$ , 300K), **7g**

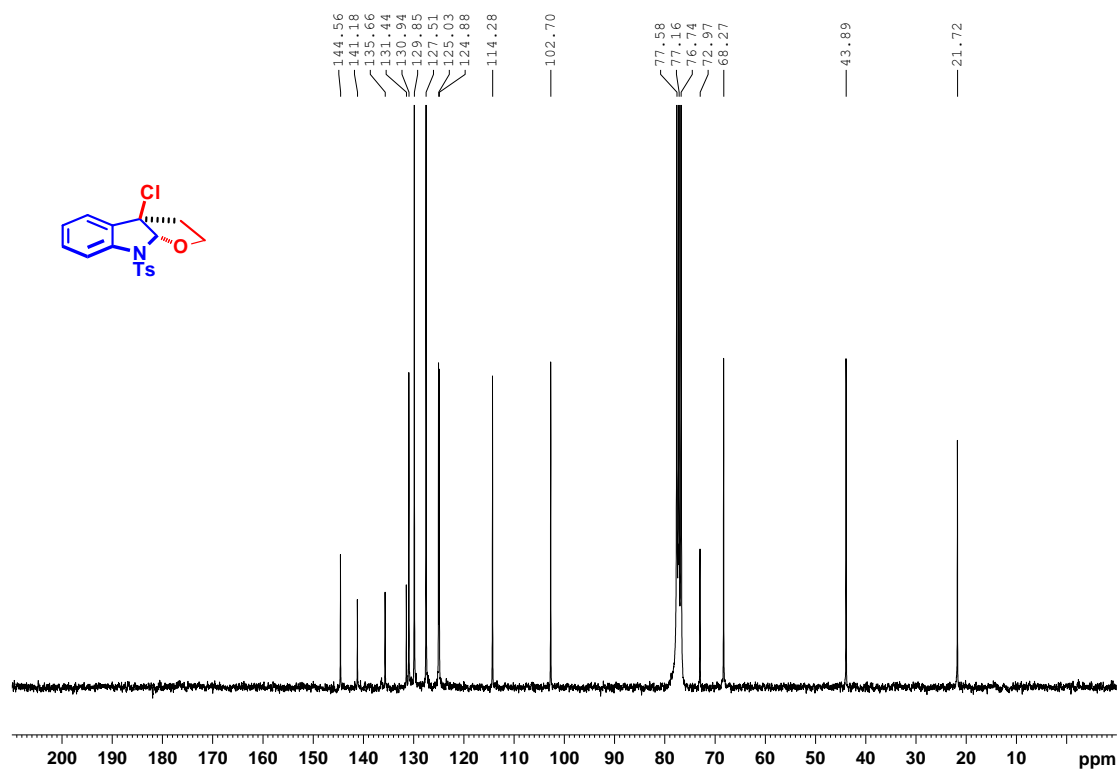

$^1\text{H}$  NMR ( $\text{CDCl}_3$ , 300K), **8a**

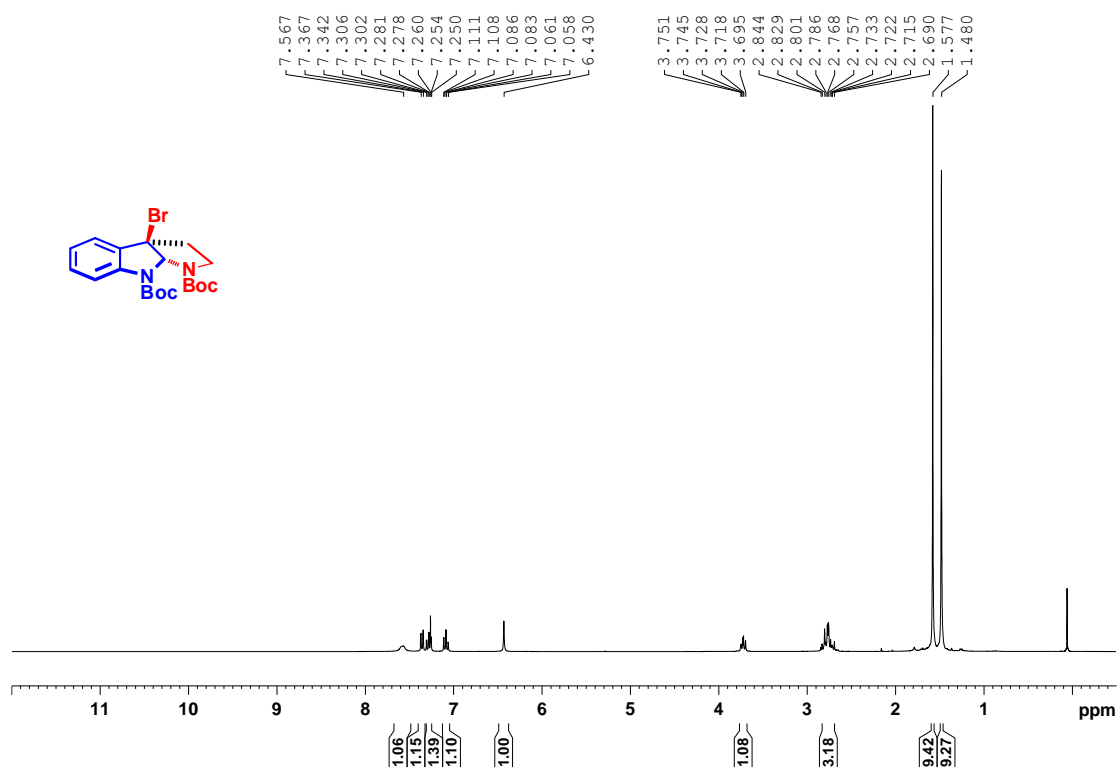

$^{13}\text{C}$  NMR ( $\text{CDCl}_3$ , 300K), **8a**

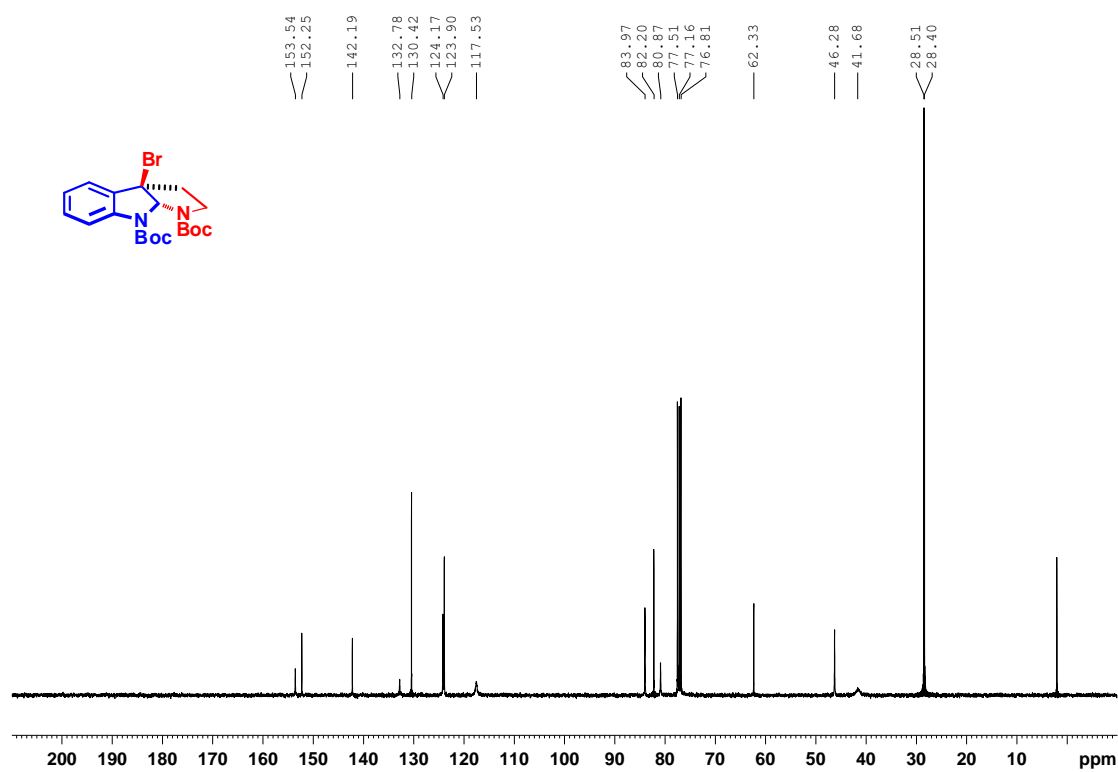

$^1\text{H}$  NMR ( $\text{CDCl}_3$ , 300K), **8b**

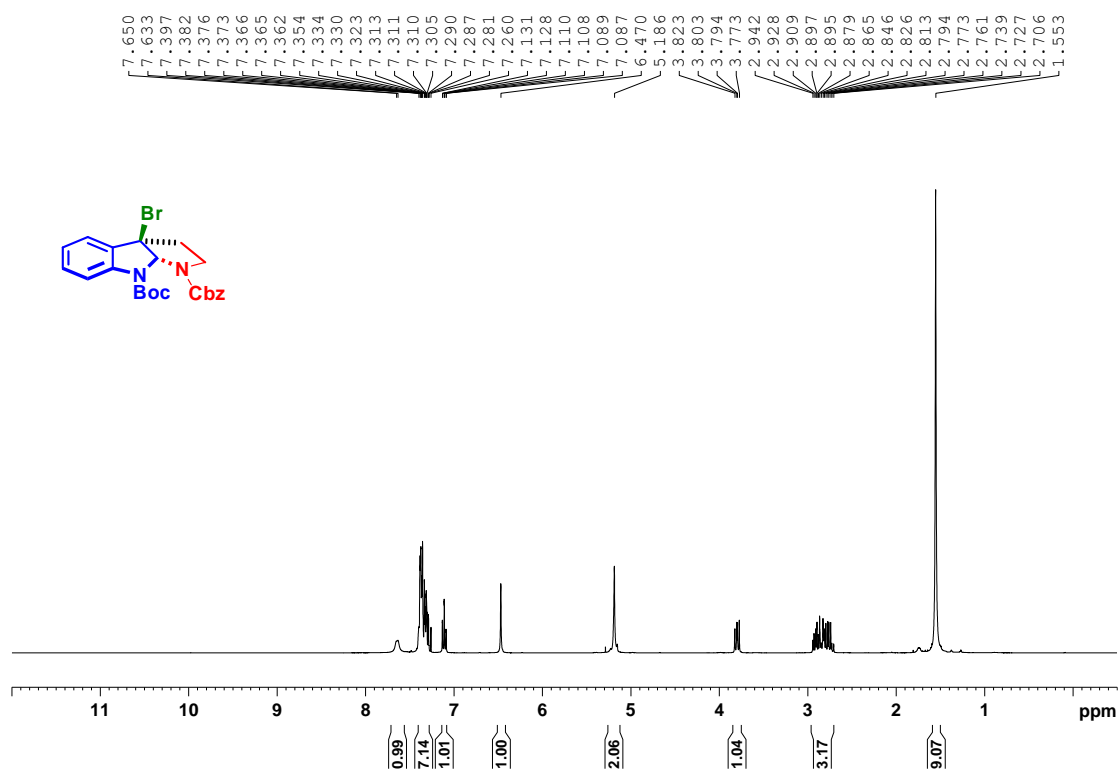

$^{13}\text{C}$  NMR ( $\text{CDCl}_3$ , 300K), **8b**

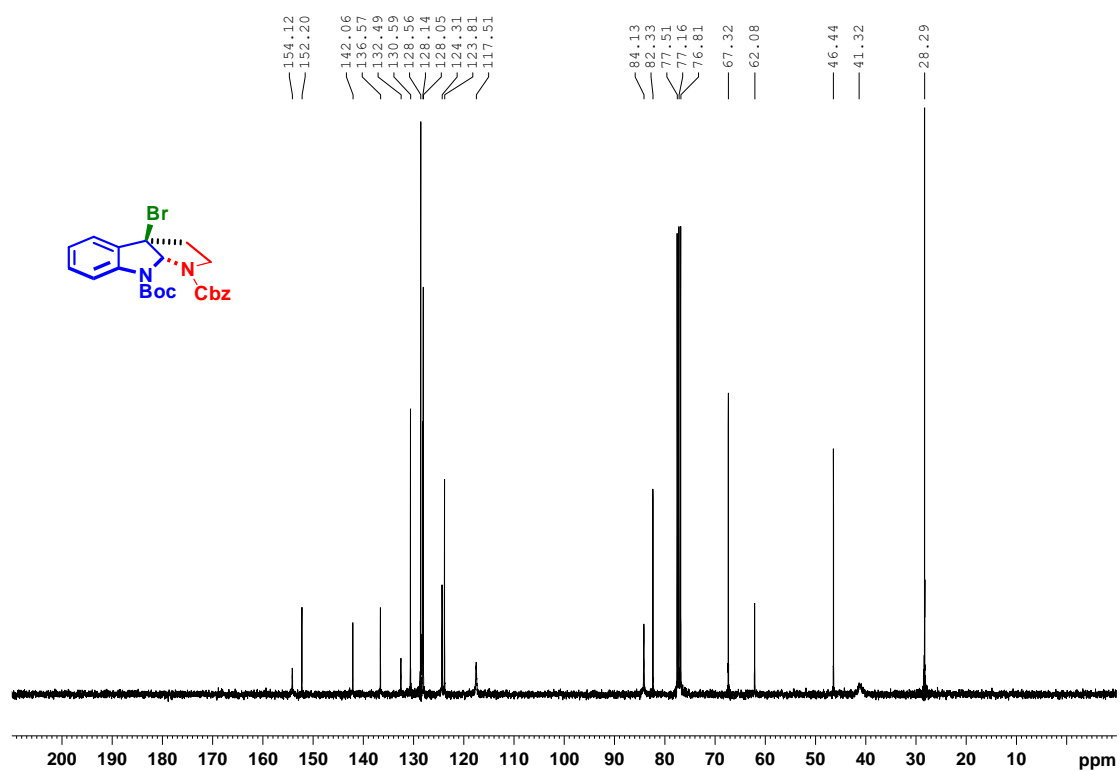

$^1\text{H}$  NMR ( $\text{CDCl}_3$ , 300K), **8c**

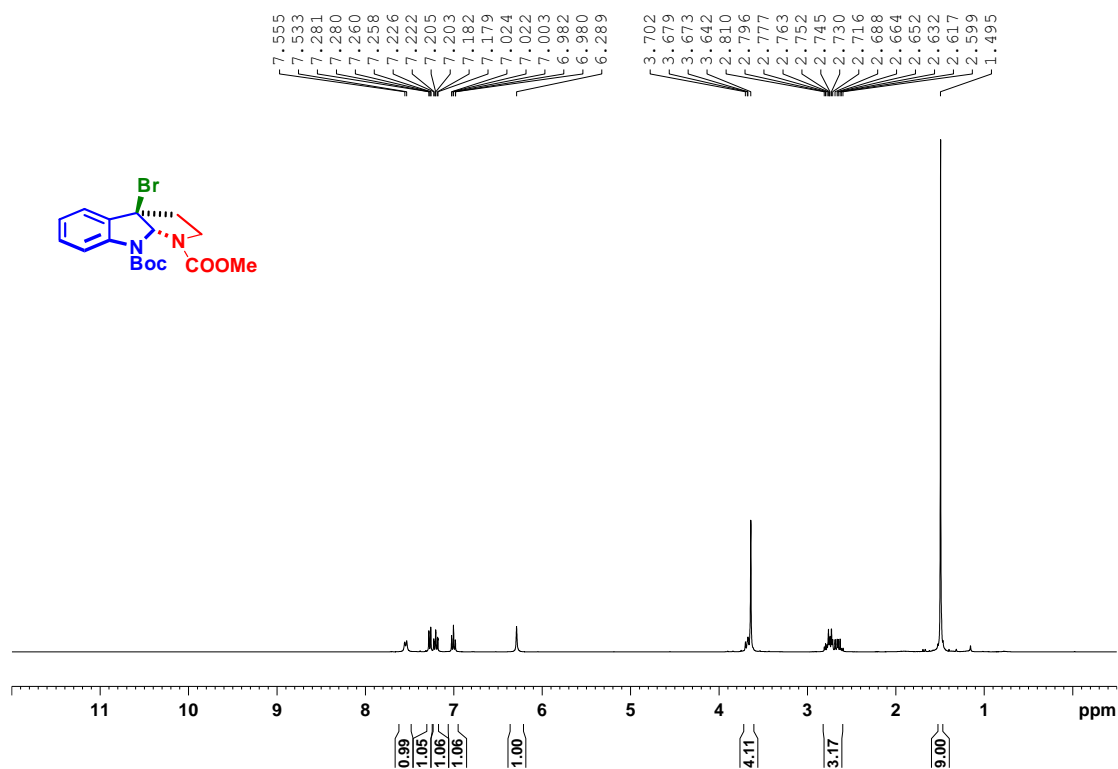

$^{13}\text{C}$  NMR ( $\text{CDCl}_3$ , 300K), **8c**

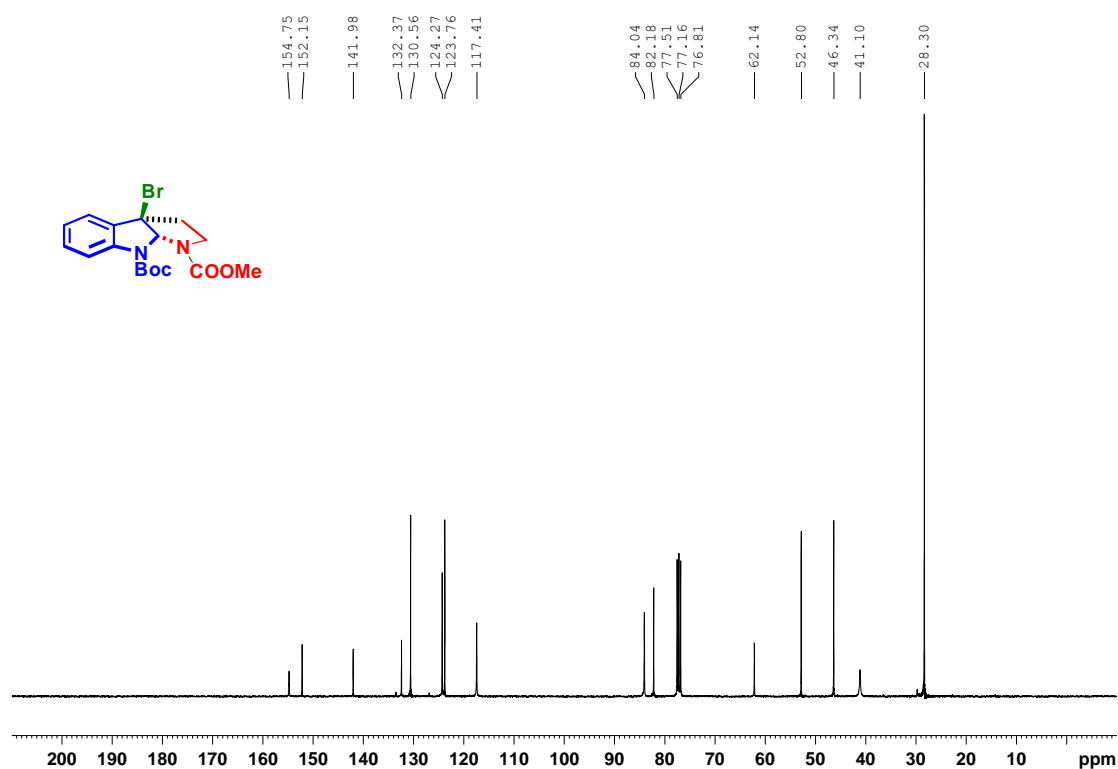

$^1\text{H}$  NMR ( $\text{CDCl}_3$ , 300K), **8d**

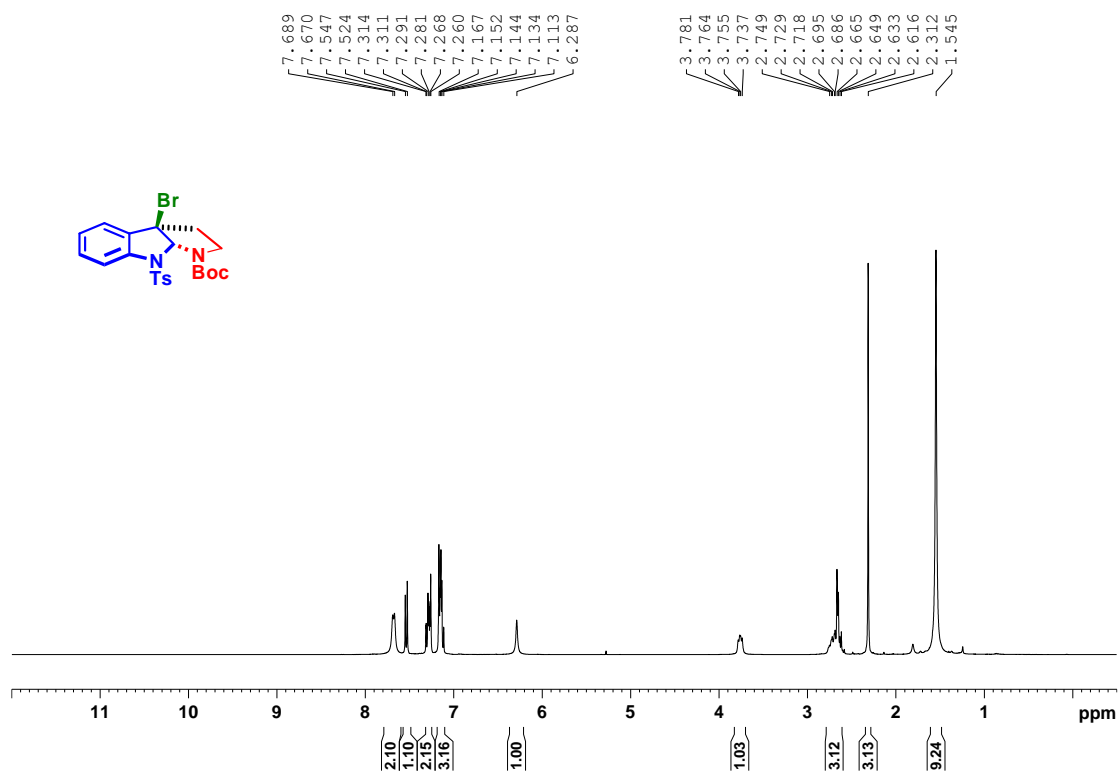

$^{13}\text{C}$  NMR ( $\text{CDCl}_3$ , 300K), **8d**

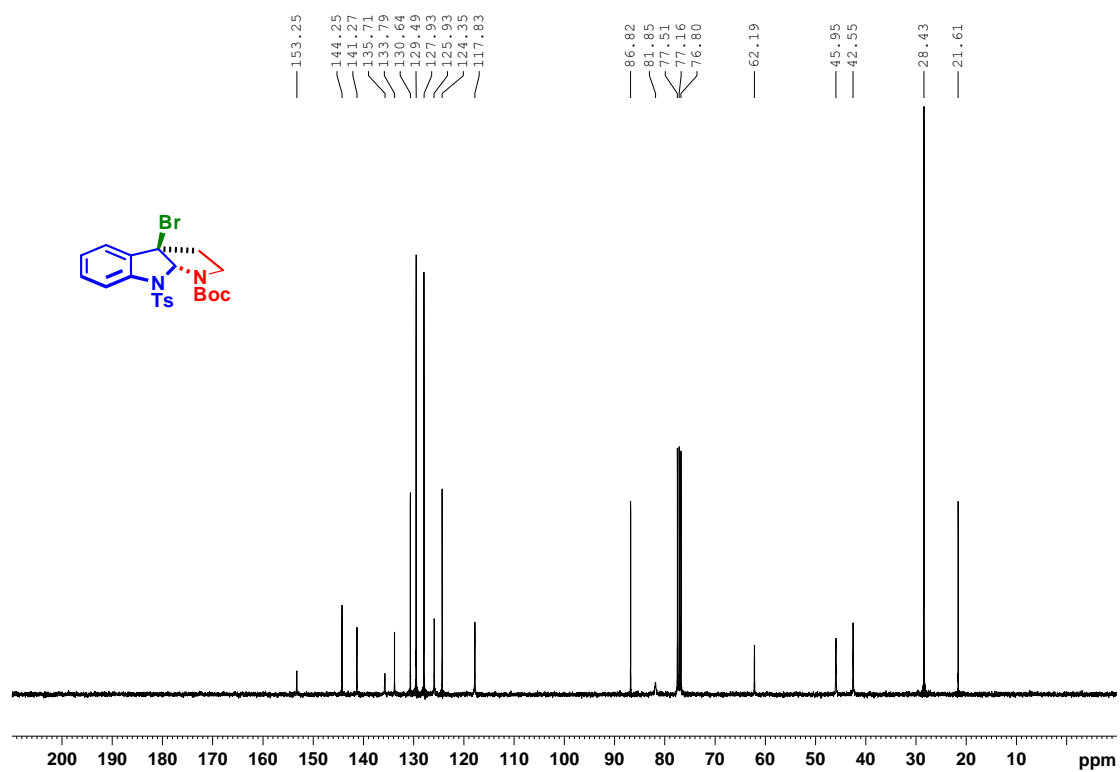

$^1\text{H}$  NMR ( $\text{CDCl}_3$ , 300K), **8e**

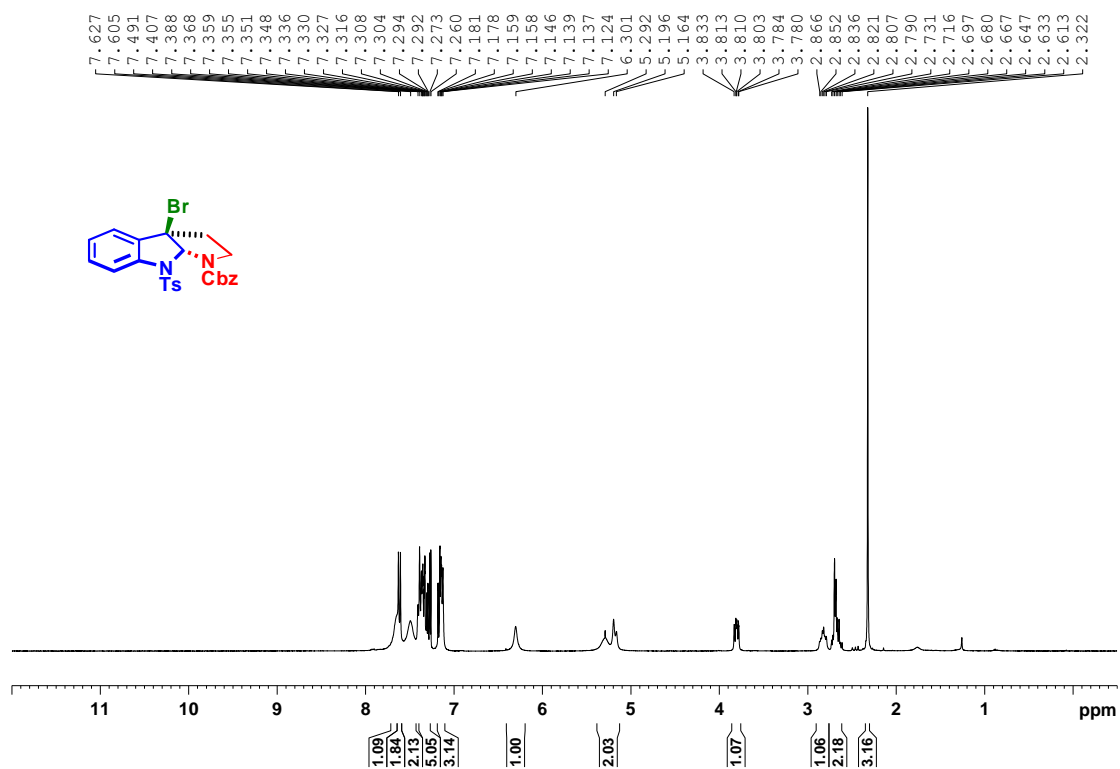

$^{13}\text{C}$  NMR ( $\text{CDCl}_3$ , 300K), **8e**

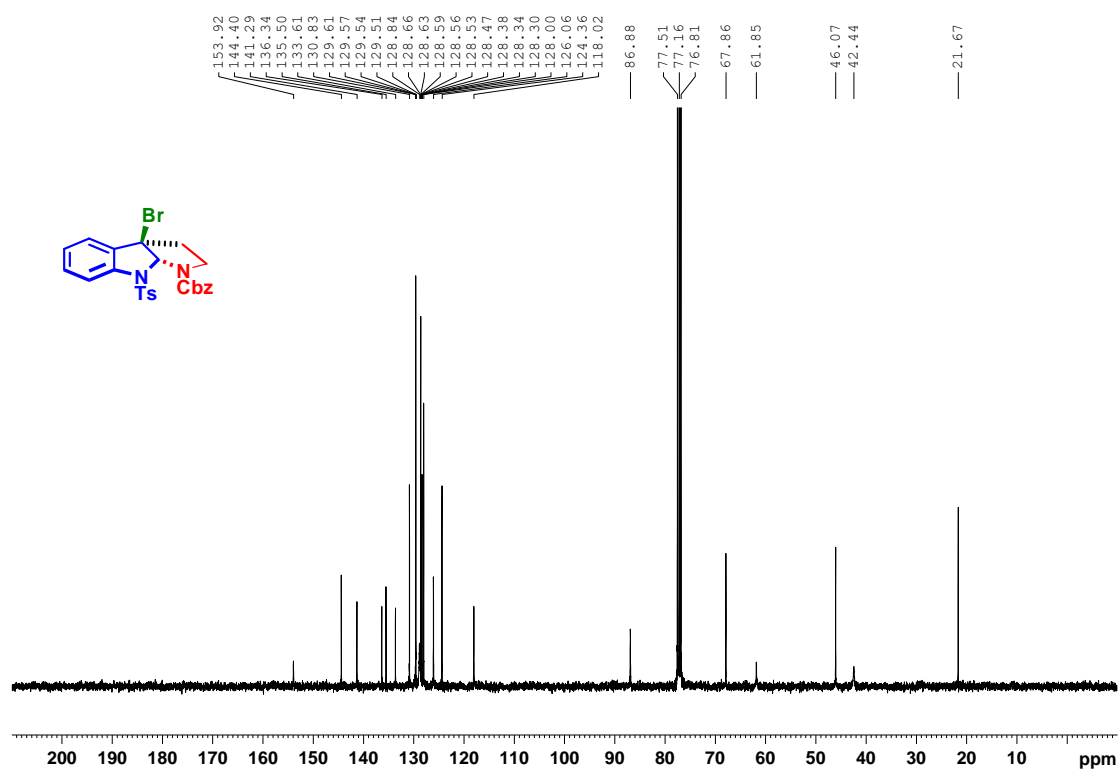

$^1\text{H}$  NMR ( $\text{CDCl}_3$ , 300K), **8f**

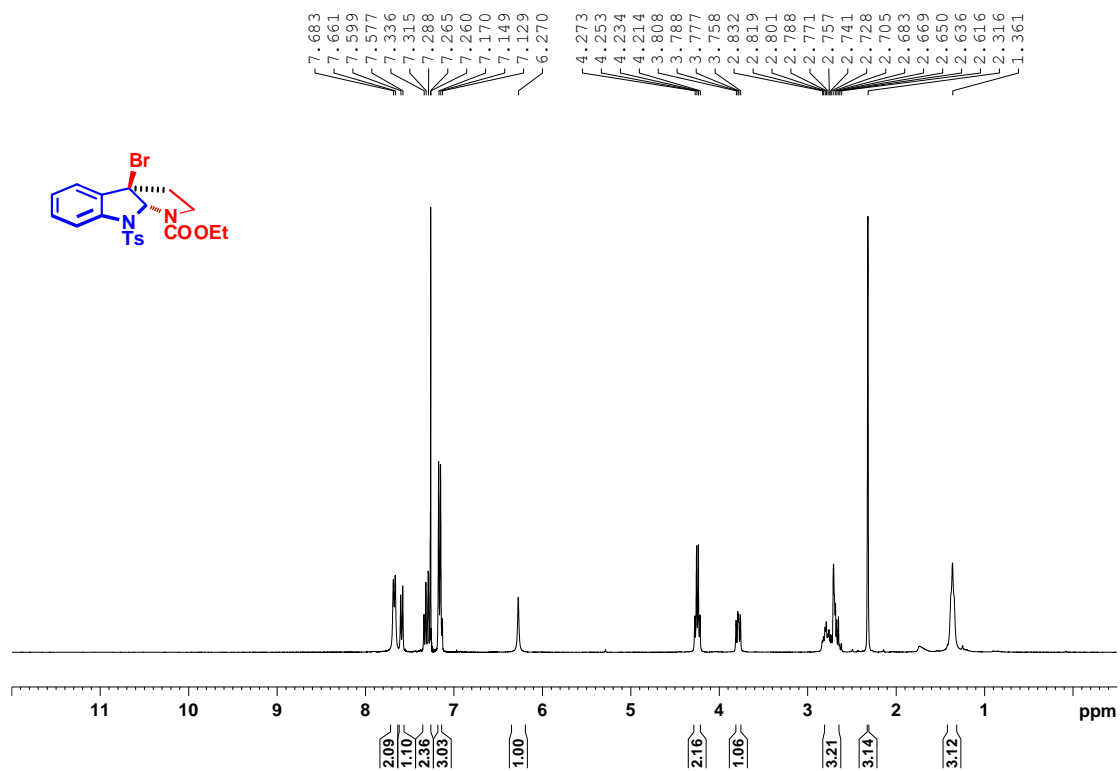

$^{13}\text{C}$  NMR ( $\text{CDCl}_3$ , 300K), **8f**

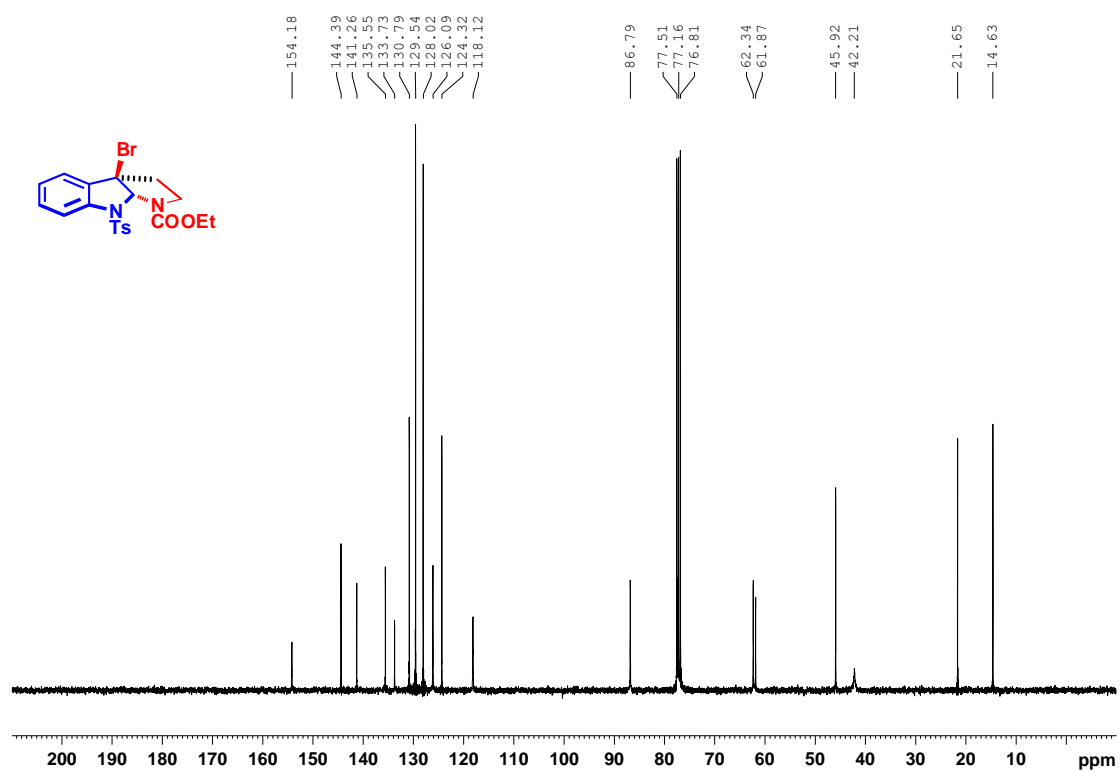

$^1\text{H}$  NMR ( $\text{CDCl}_3$ , 300K), **8g**

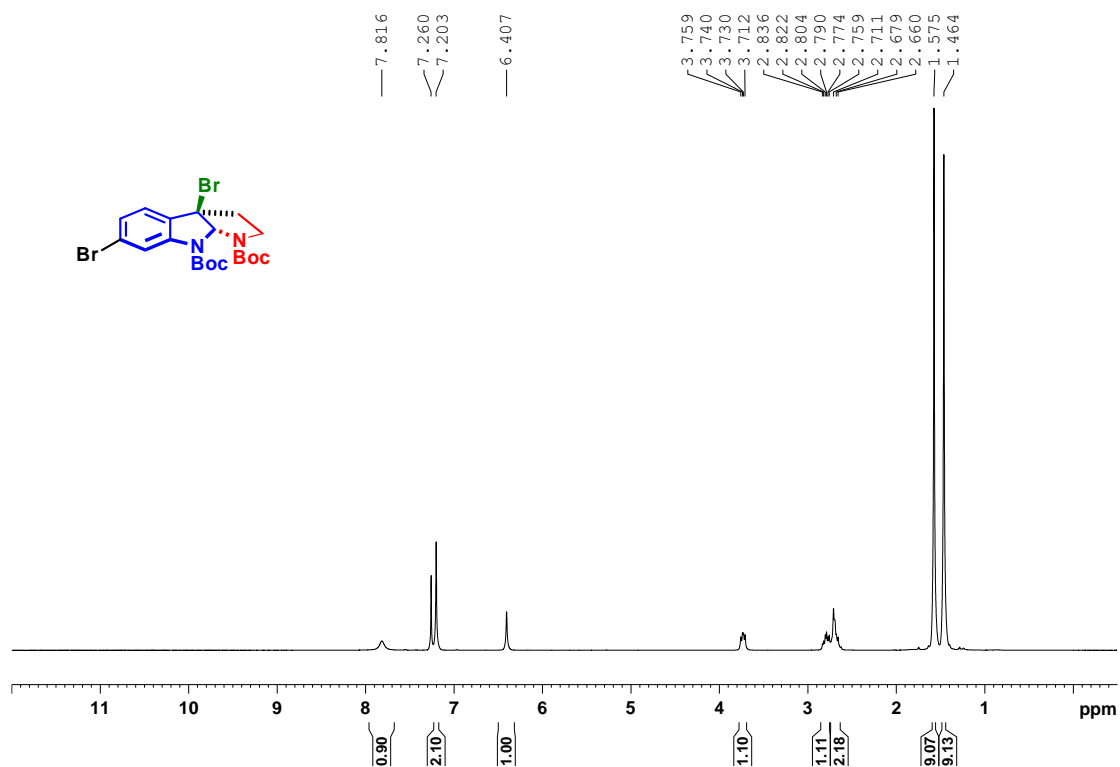

$^{13}\text{C}$  NMR ( $\text{CDCl}_3$ , 300K), **8g**

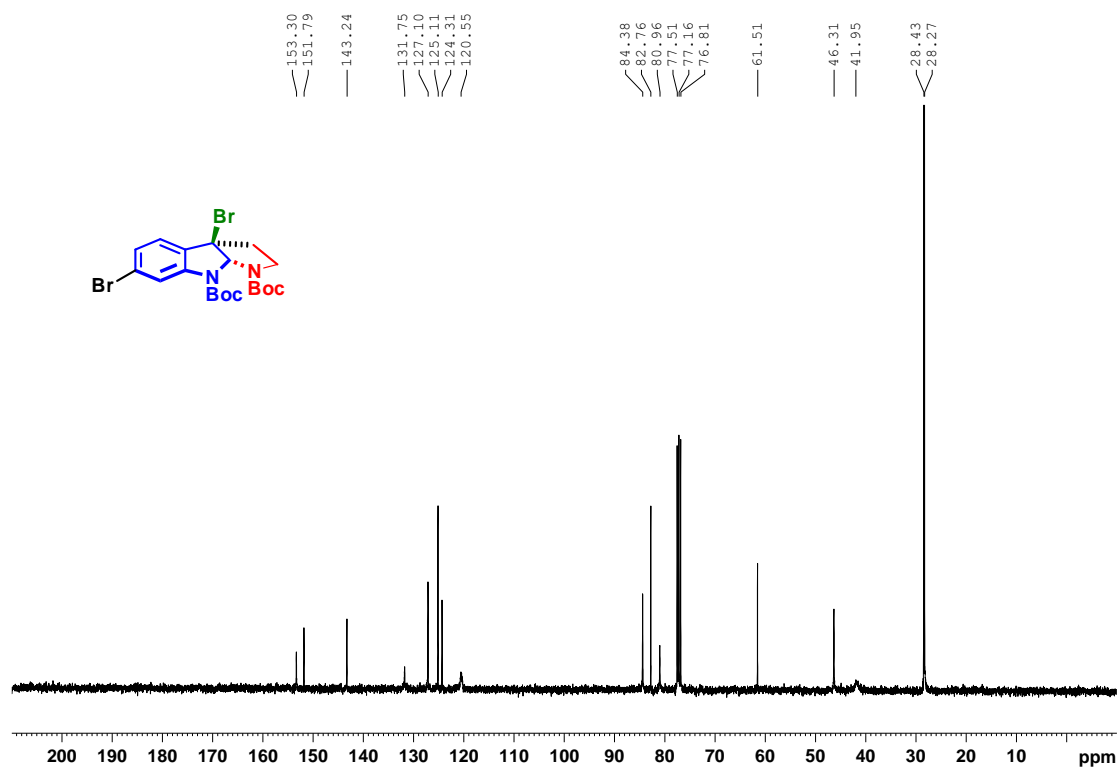



$^1\text{H}$  NMR ( $\text{CDCl}_3$ , 300K), **8h**

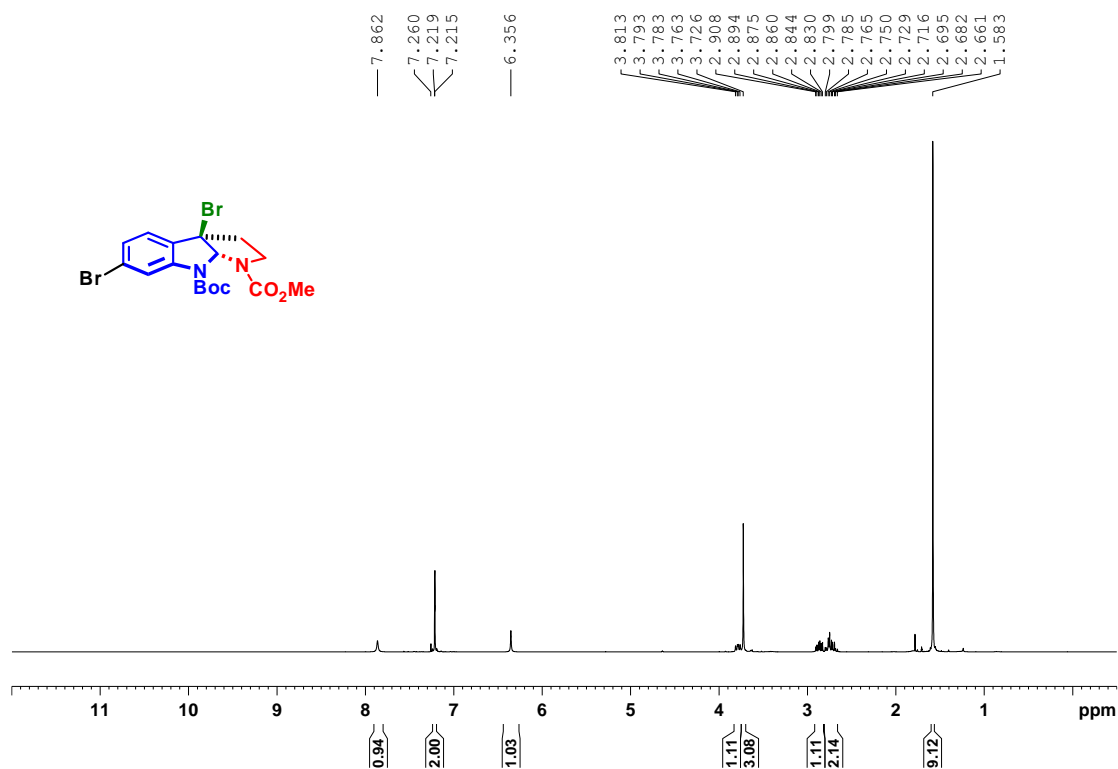

$^{13}\text{C}$  NMR ( $\text{CDCl}_3$ , 300K), **8h**

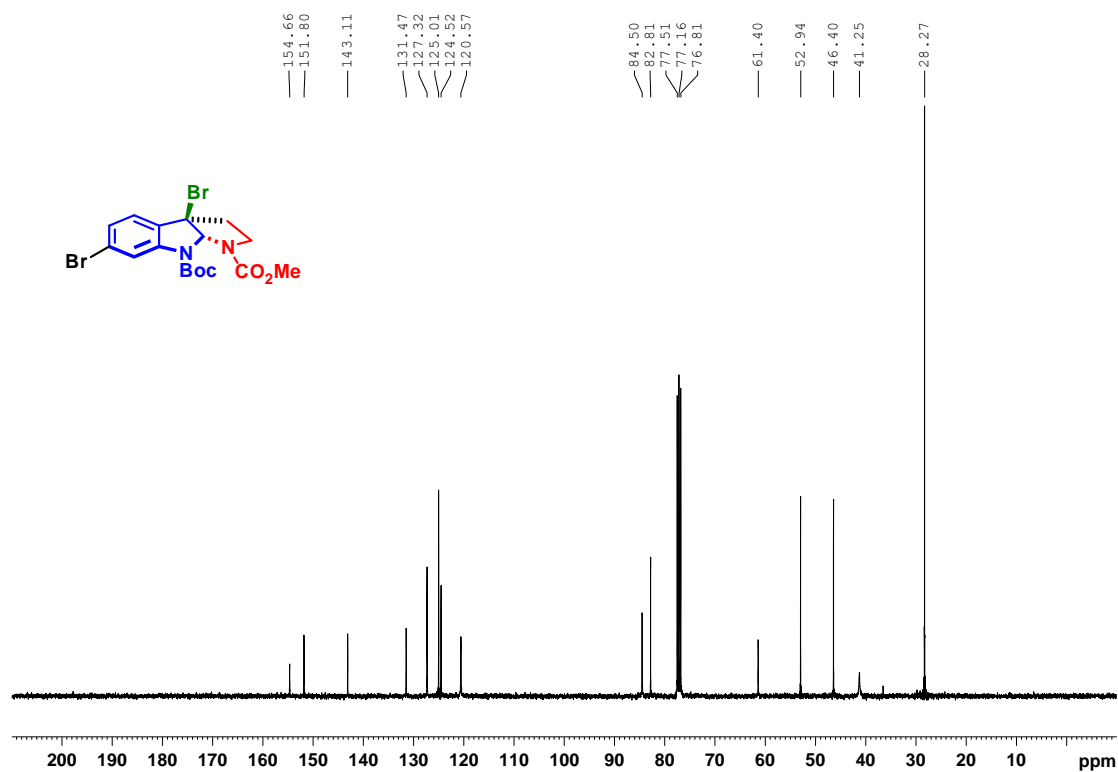

$^1\text{H}$  NMR ( $\text{CDCl}_3$ , 300K), **8i**

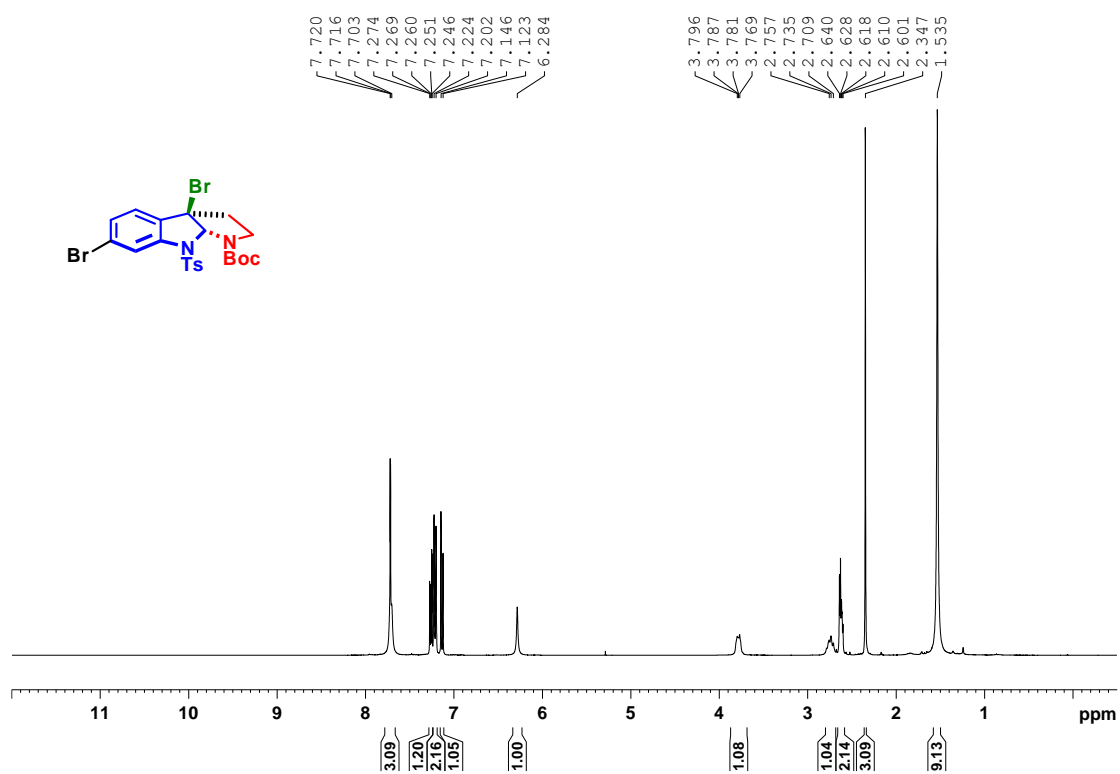

$^{13}\text{C}$  NMR ( $\text{CDCl}_3$ , 300K), **8i**

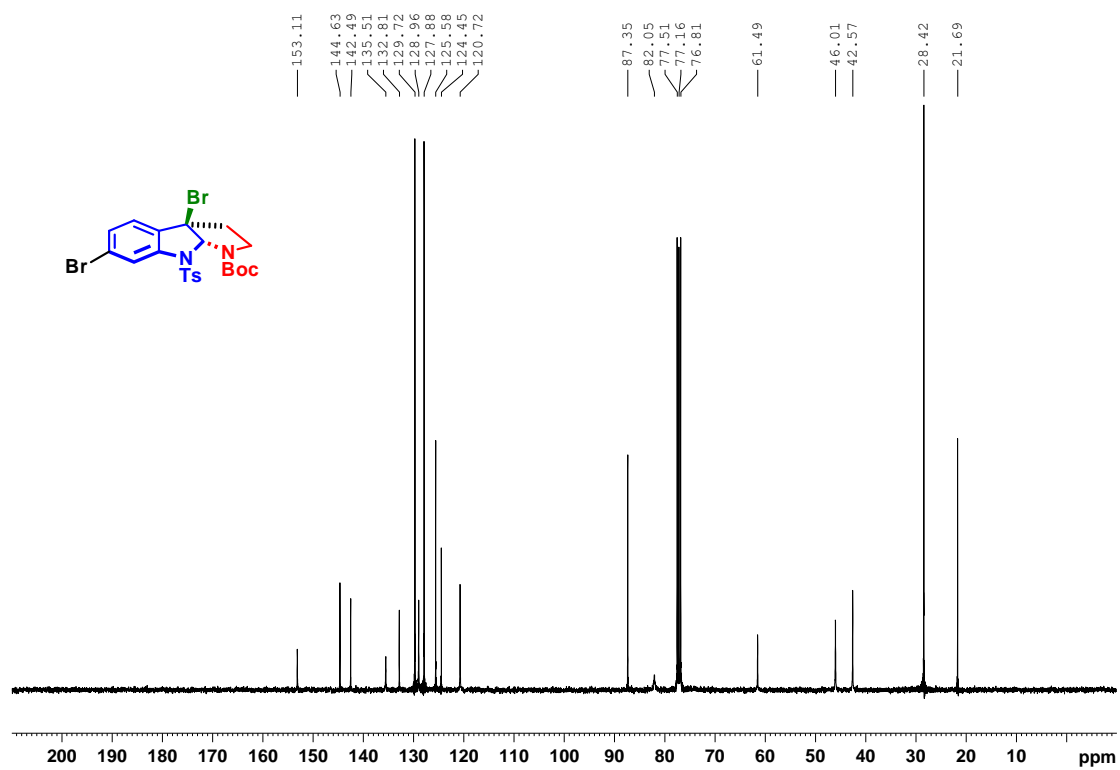

$^1\text{H}$  NMR ( $\text{CDCl}_3$ , 300K), **8j**

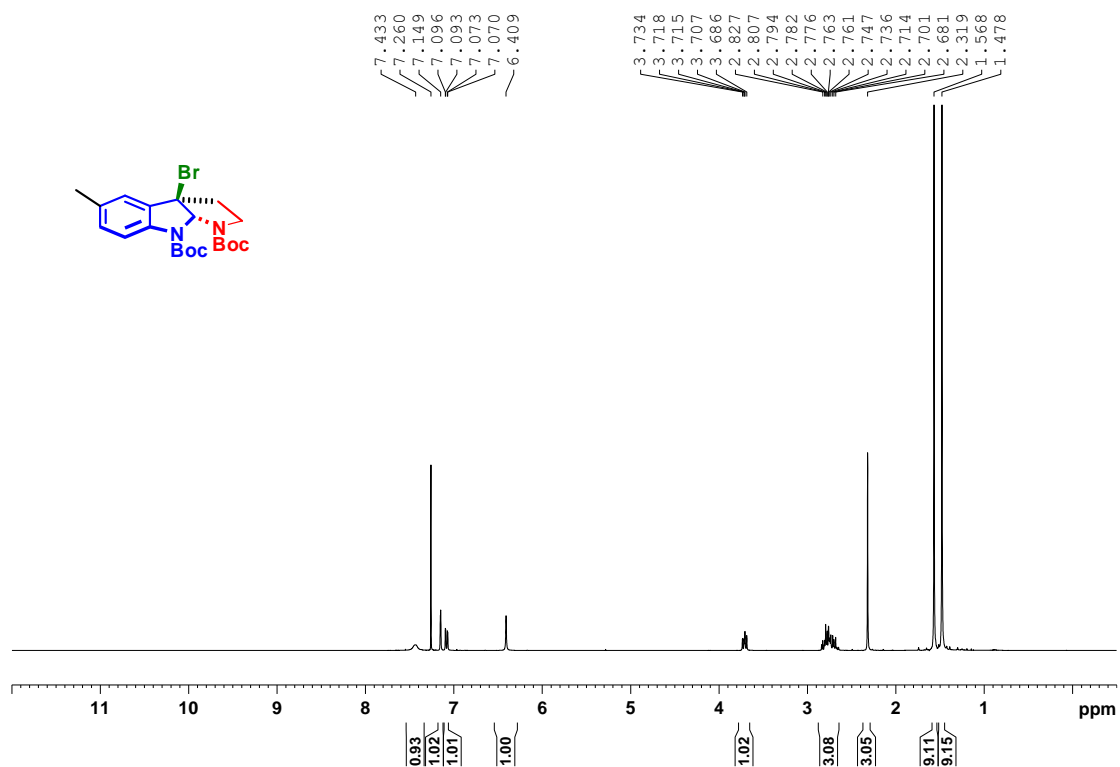

$^{13}\text{C}$  NMR ( $\text{CDCl}_3$ , 300K), **8j**

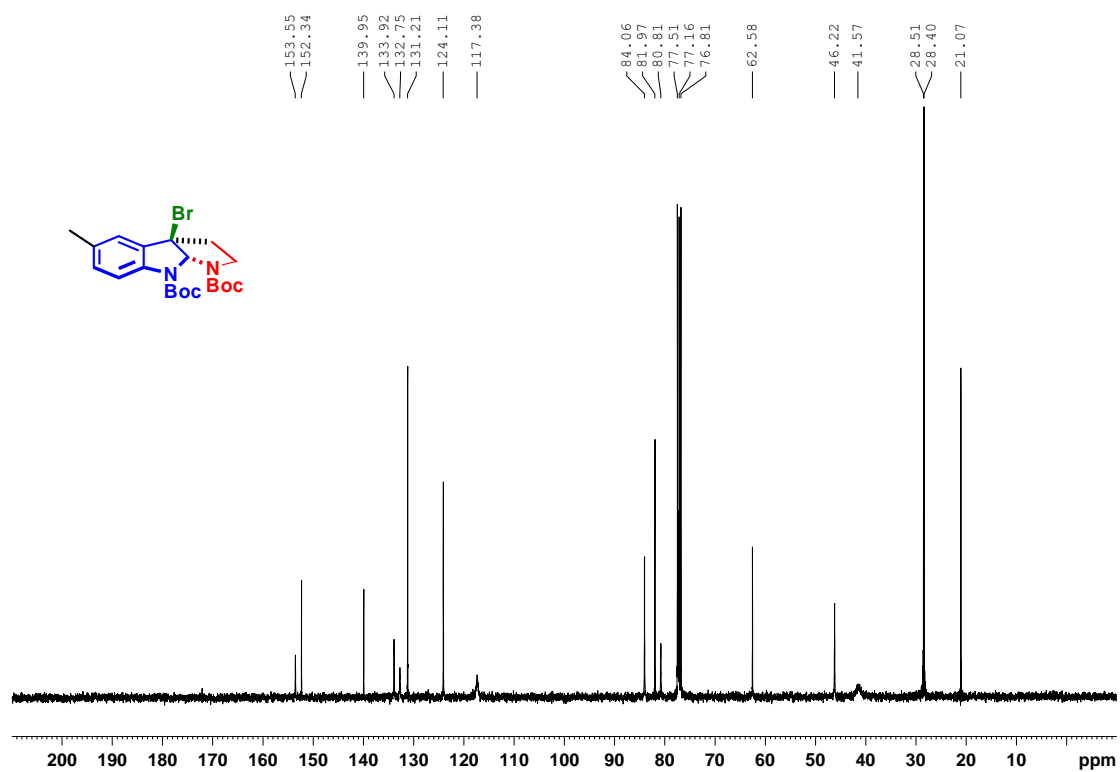

$^1\text{H}$  NMR ( $\text{CDCl}_3$ , 300K), **8k** (*exo/endo* 90:10 mixture of diastereoisomers)

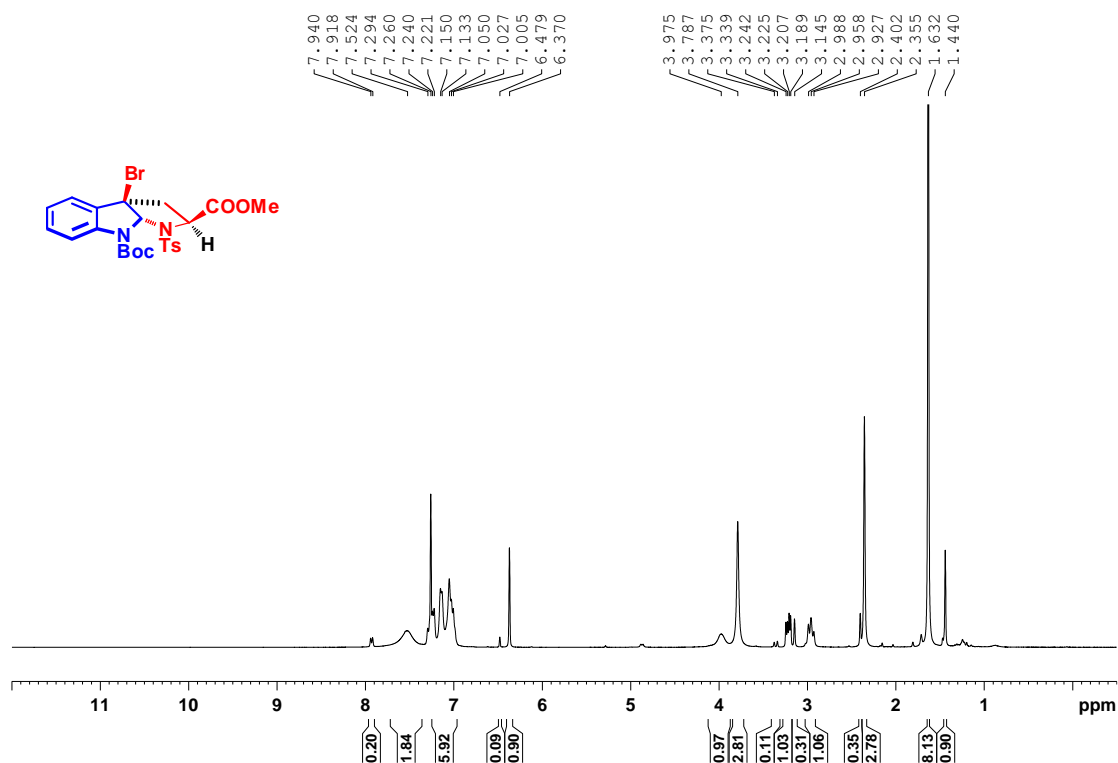

$^{13}\text{C}$  NMR ( $\text{CDCl}_3$ , 300K), **8k** (*exo/endo* 90:10 mixture of diastereoisomers)

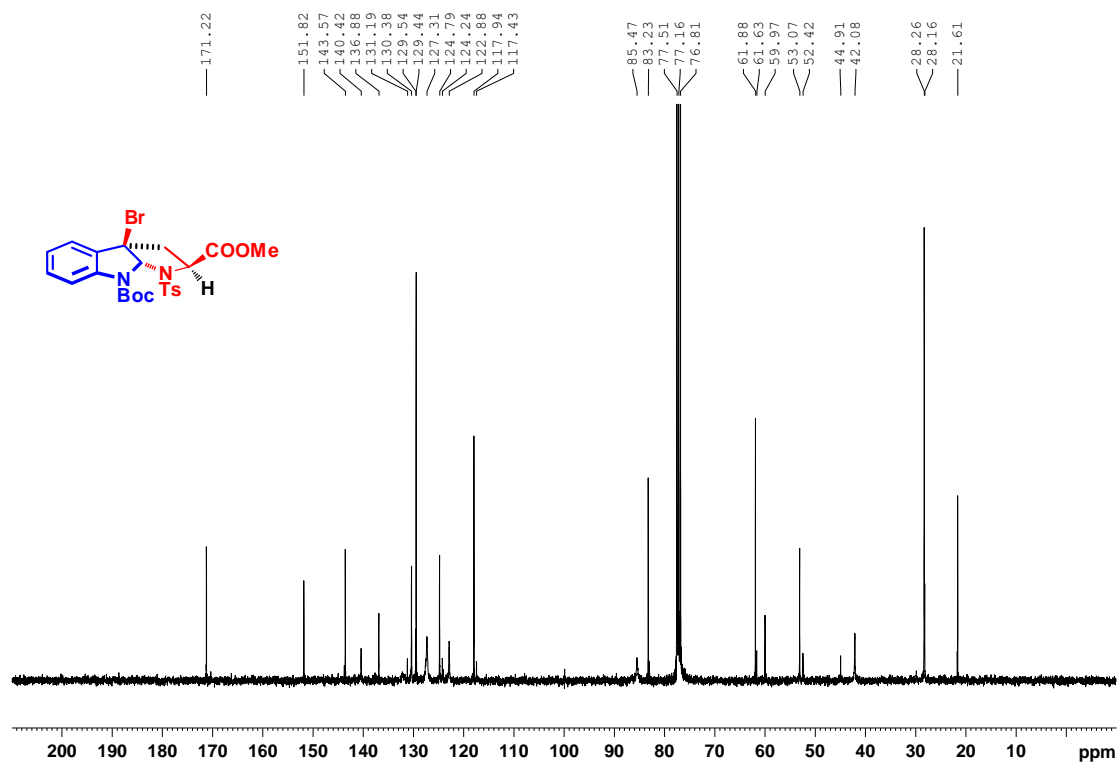

$^1\text{H}$  NMR ( $\text{CDCl}_3$ , 300K), **81** (*exo/endo* 90:10 mixture of diastereoisomers)

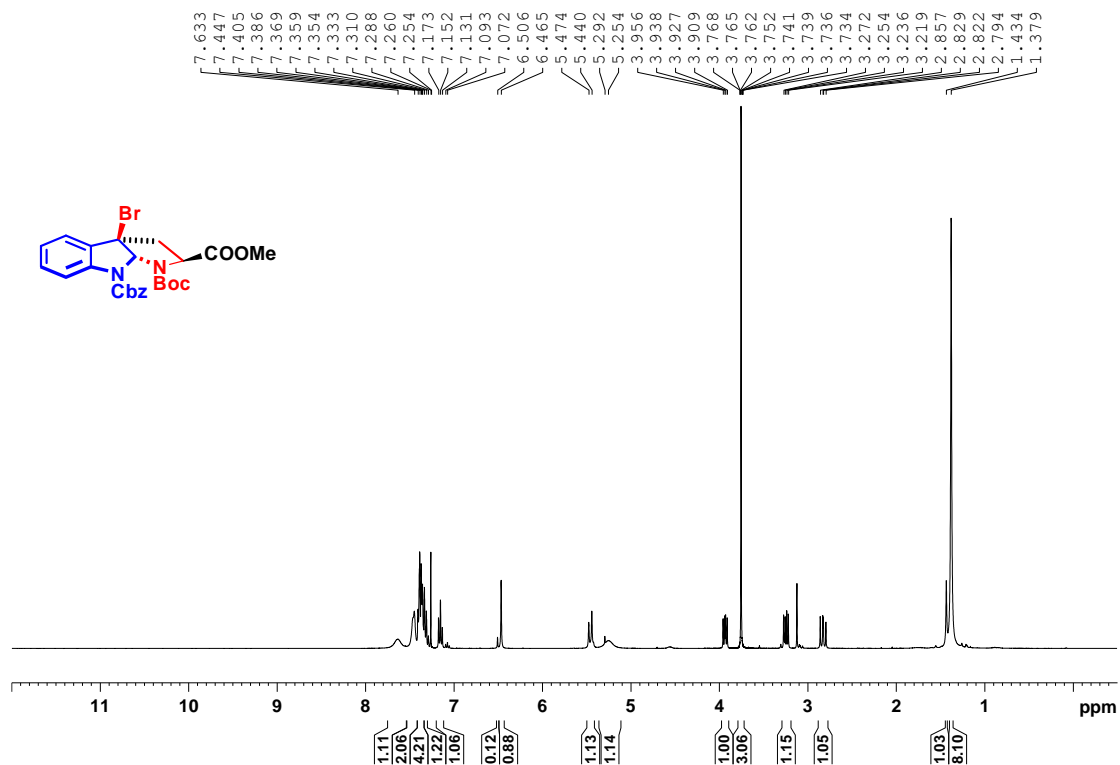

$^{13}\text{C}$  NMR ( $\text{CDCl}_3$ , 300K), **81** (*exo/endo* 90:10 mixture of diastereoisomers)

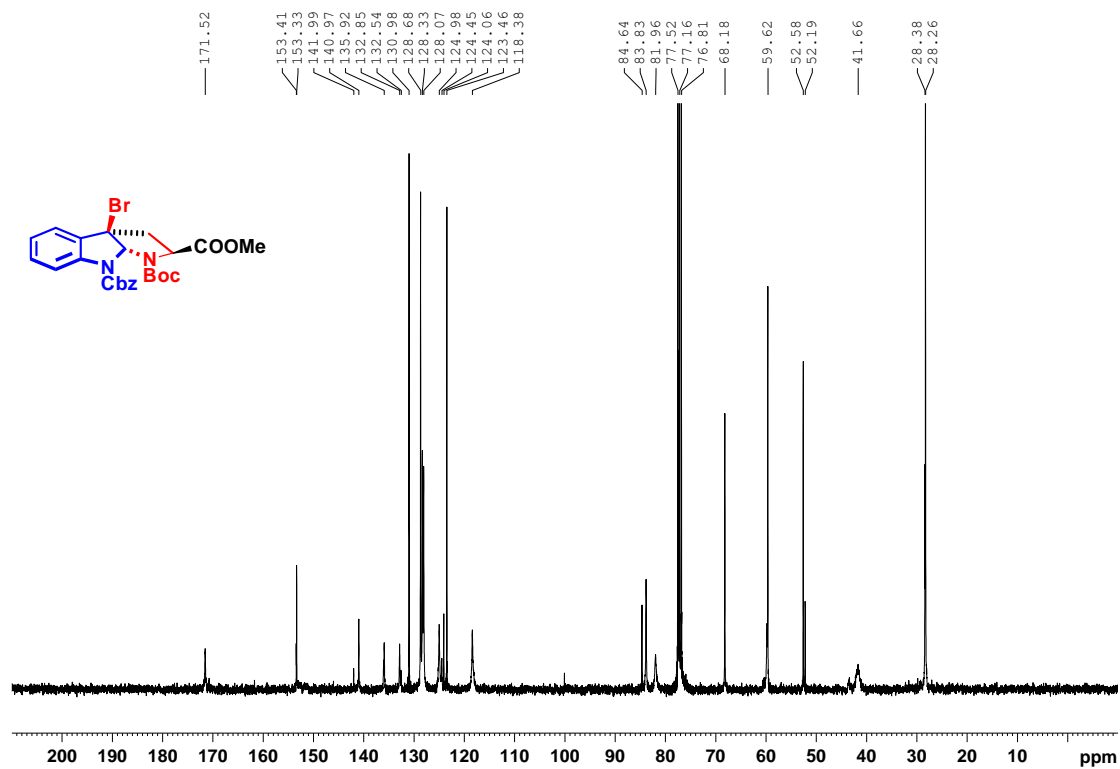

$^1\text{H}$  NMR ( $\text{CDCl}_3$ , 300K), **8m** (*exo/endo* 90:10 mixture of diastereoisomers)

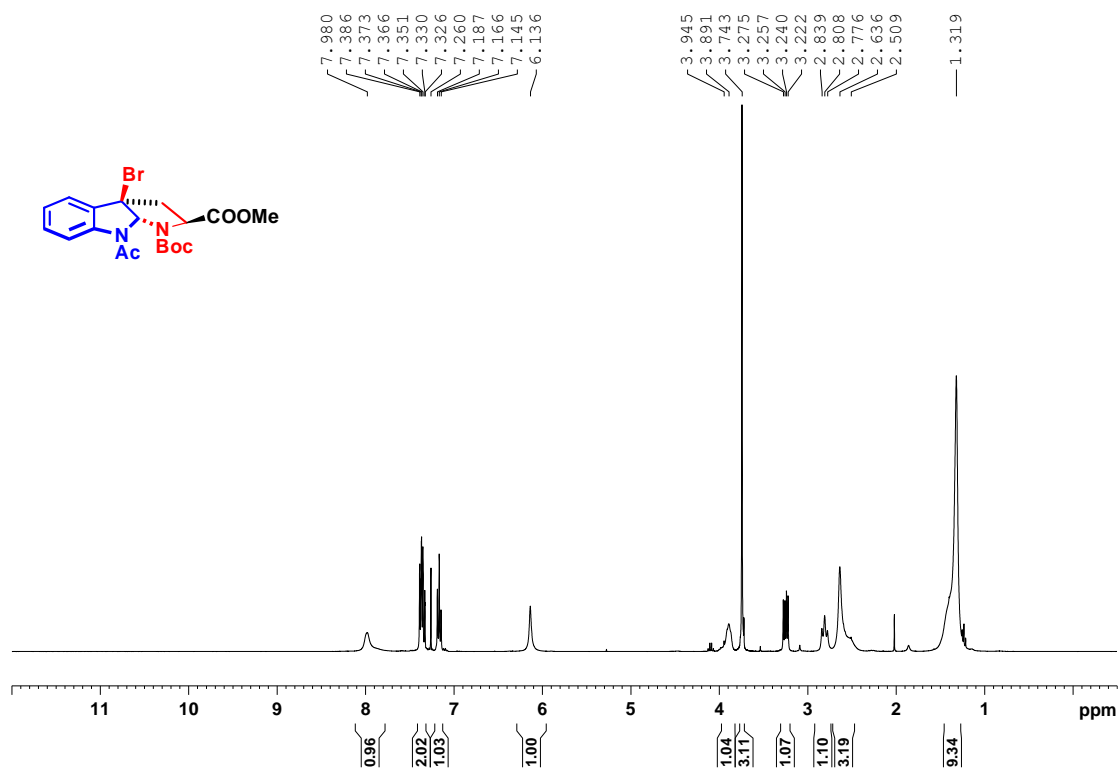

$^{13}\text{C}$  NMR ( $\text{CDCl}_3$ , 300K), **8m** (*exo/endo* 90:10 mixture of diastereoisomers)

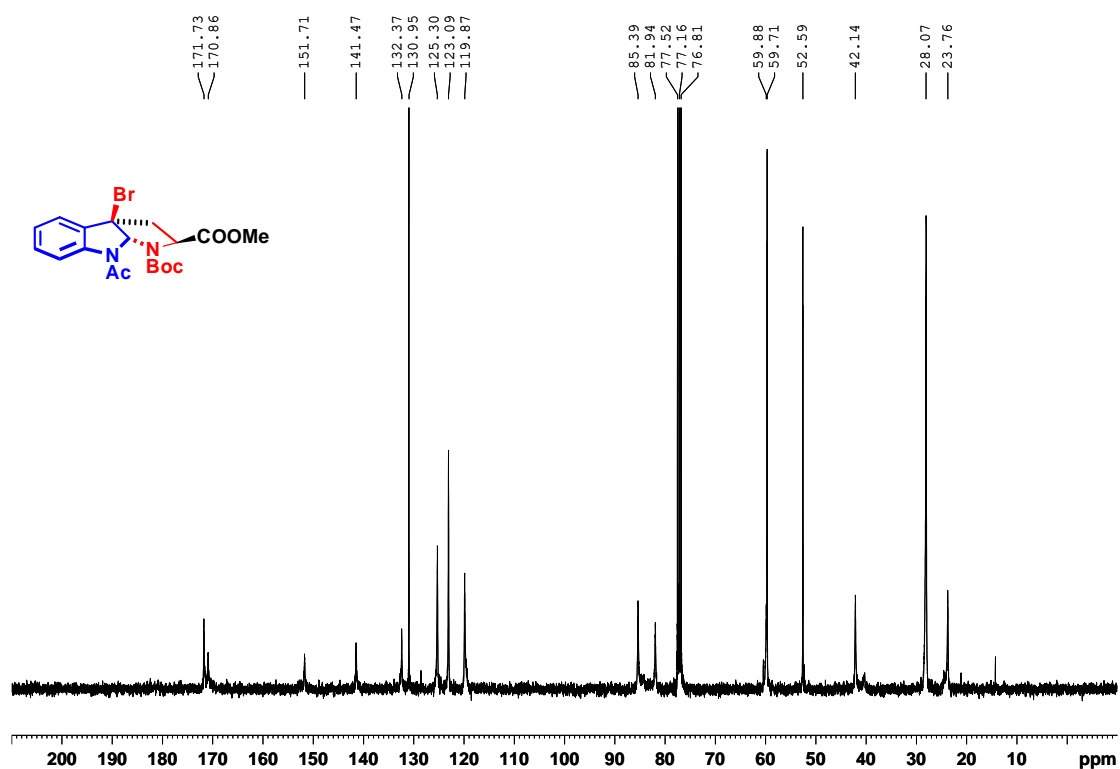

$^1\text{H}$  NMR ( $\text{CDCl}_3$ , 300K), **8n**

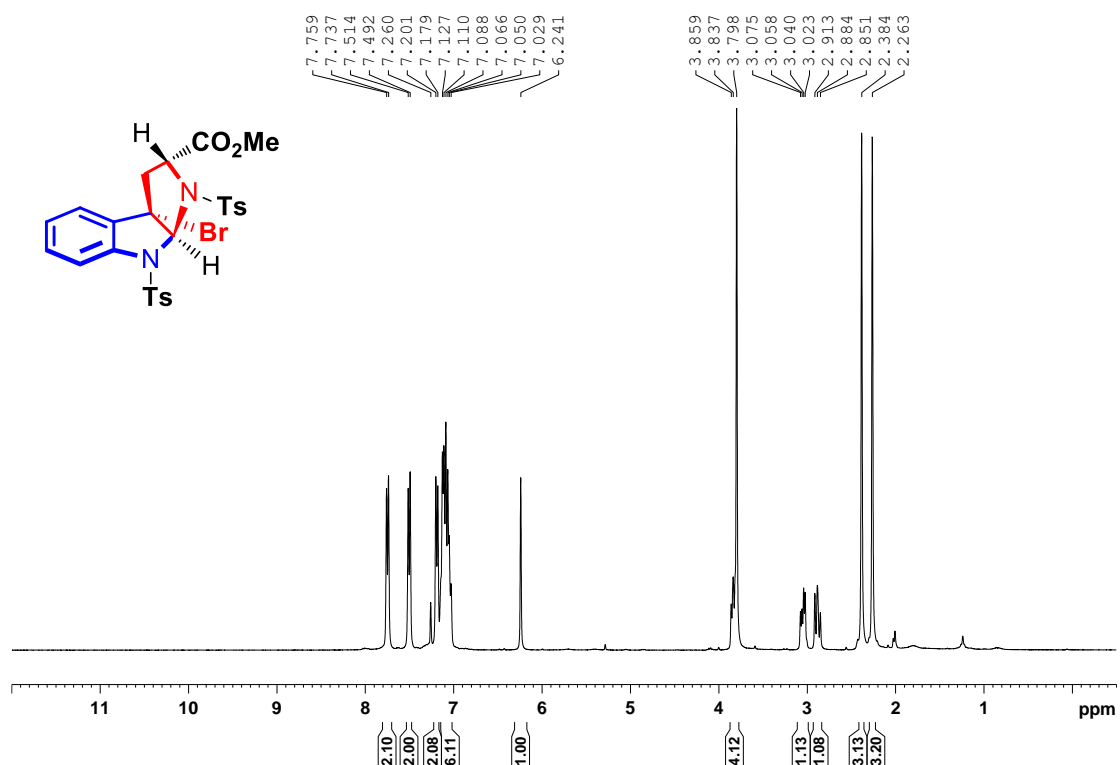

$^{13}\text{C}$  NMR ( $\text{CDCl}_3$ , 300K), **8n**

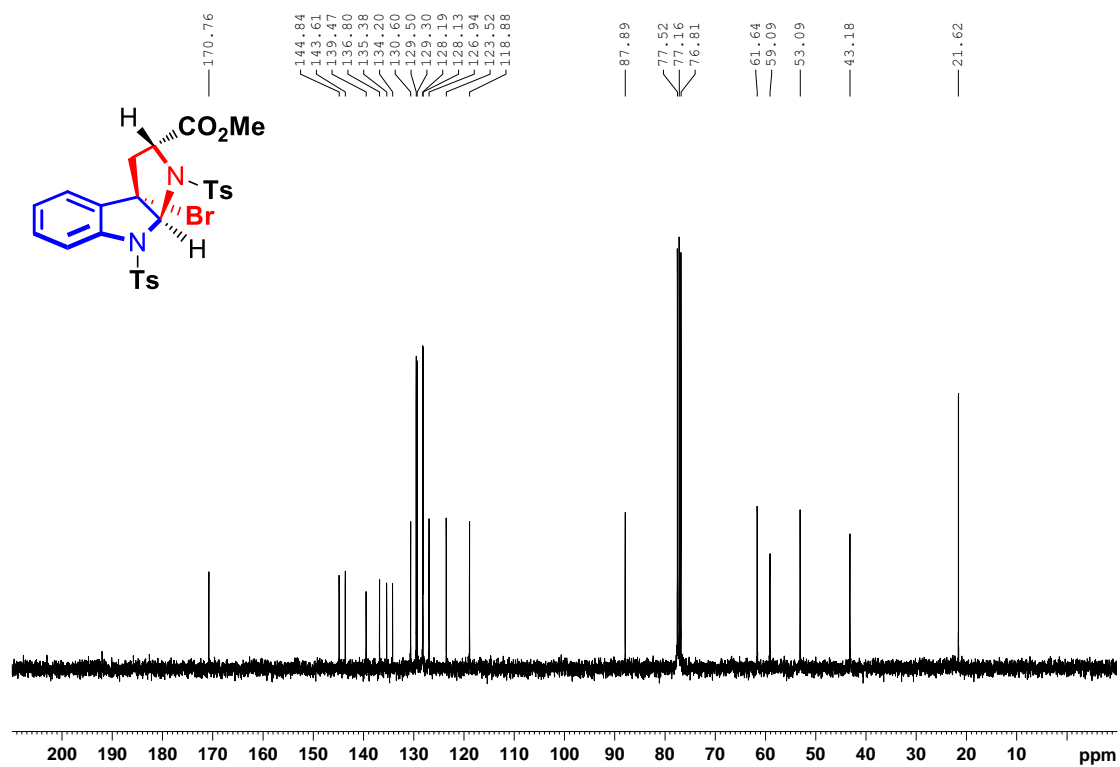

$^1\text{H}$  NMR ( $\text{CDCl}_3$ , 300K), **8o**

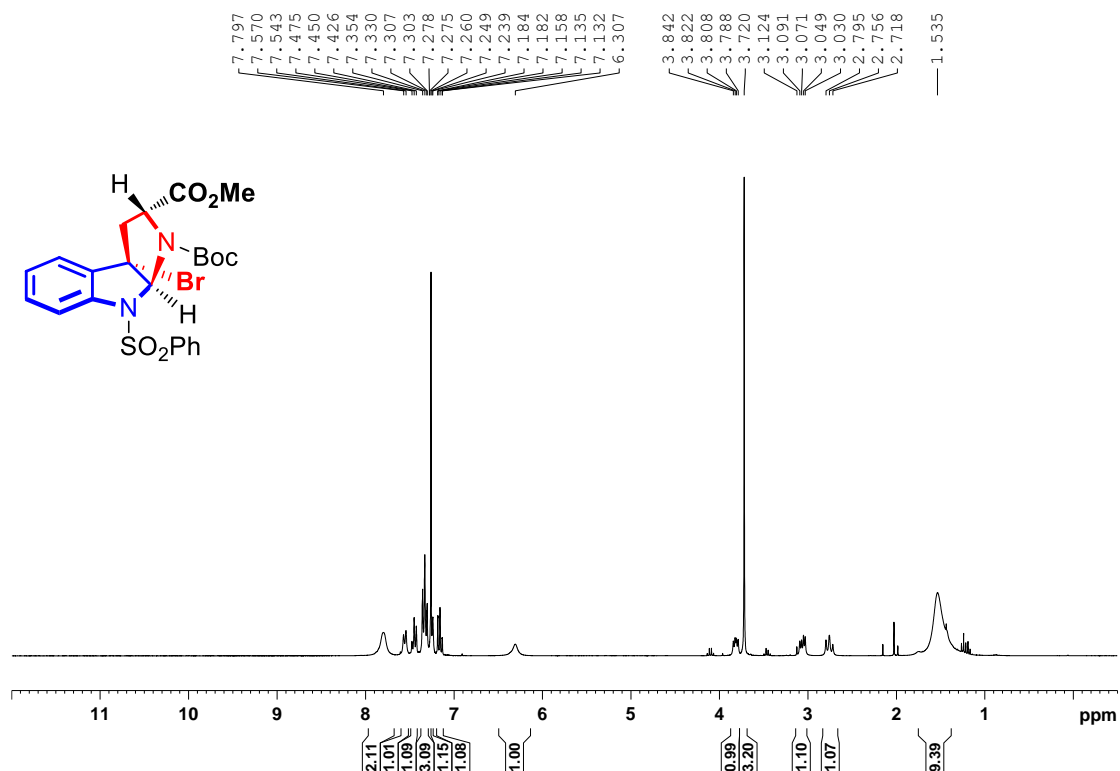

$^{13}\text{C}$  NMR ( $\text{CDCl}_3$ , 300K), **8o**

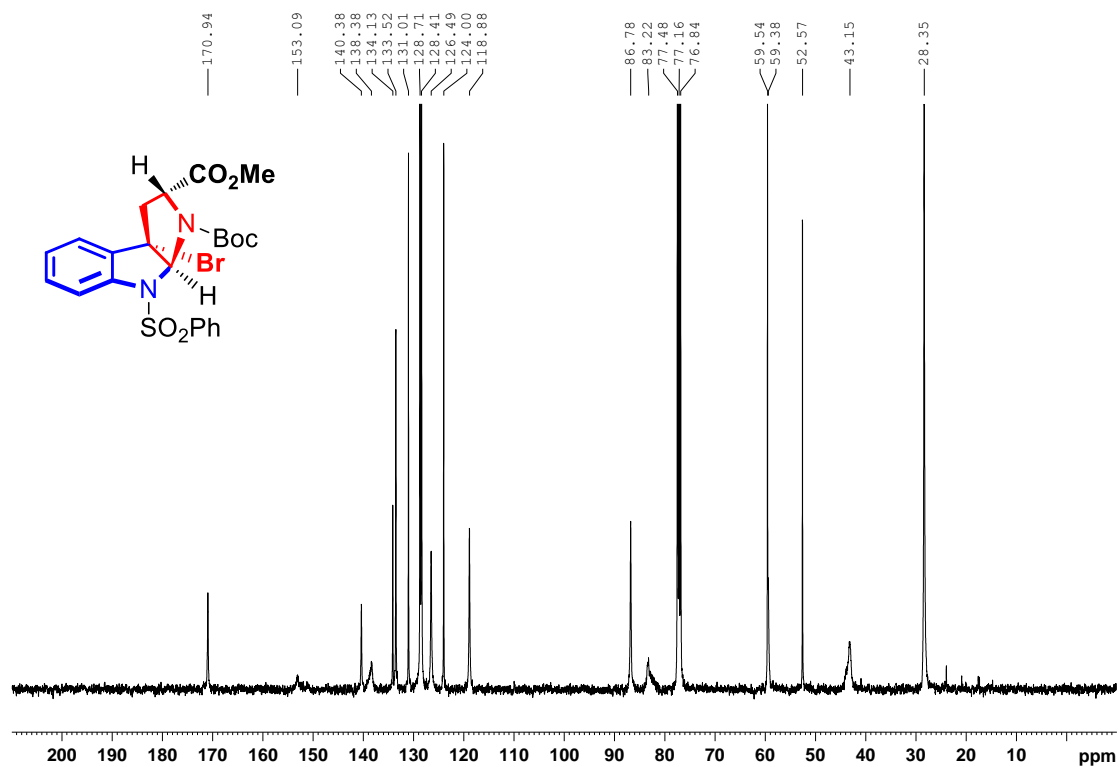



$^1\text{H}$  NMR ( $\text{CDCl}_3$ , 300K), **9**

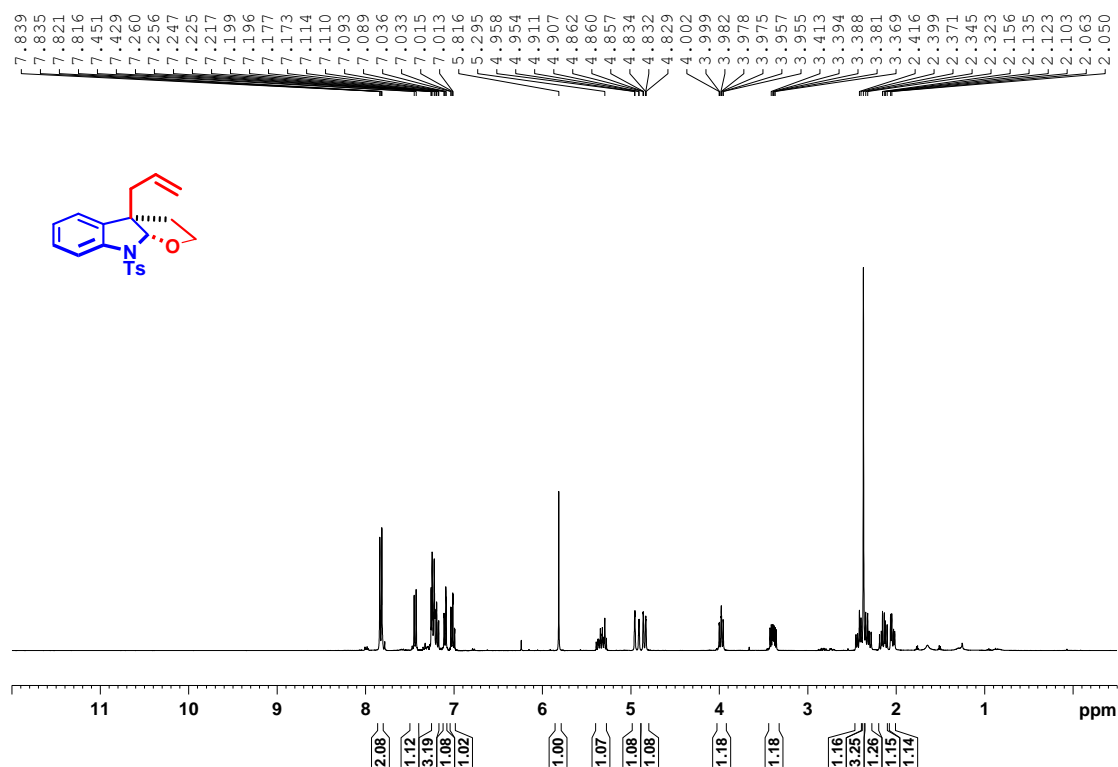

$^{13}\text{C}$  NMR ( $\text{CDCl}_3$ , 300K), **9**

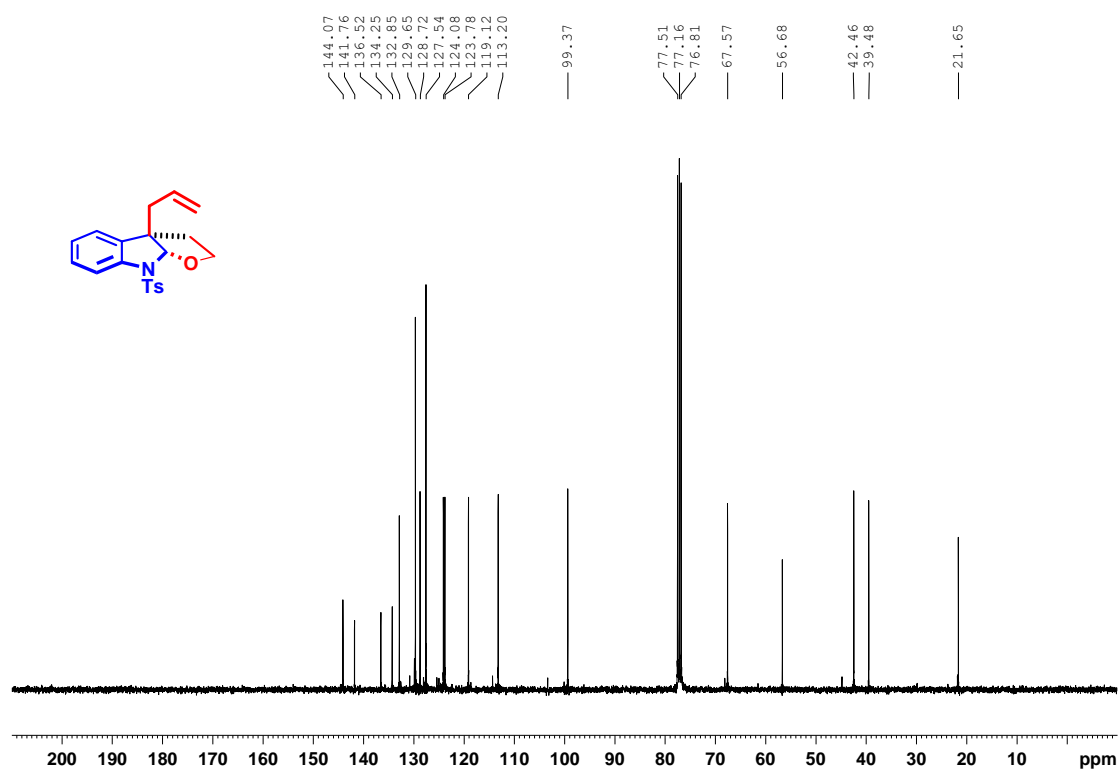

$^1\text{H}$  NMR ( $\text{CDCl}_3$ , 300K), **10**

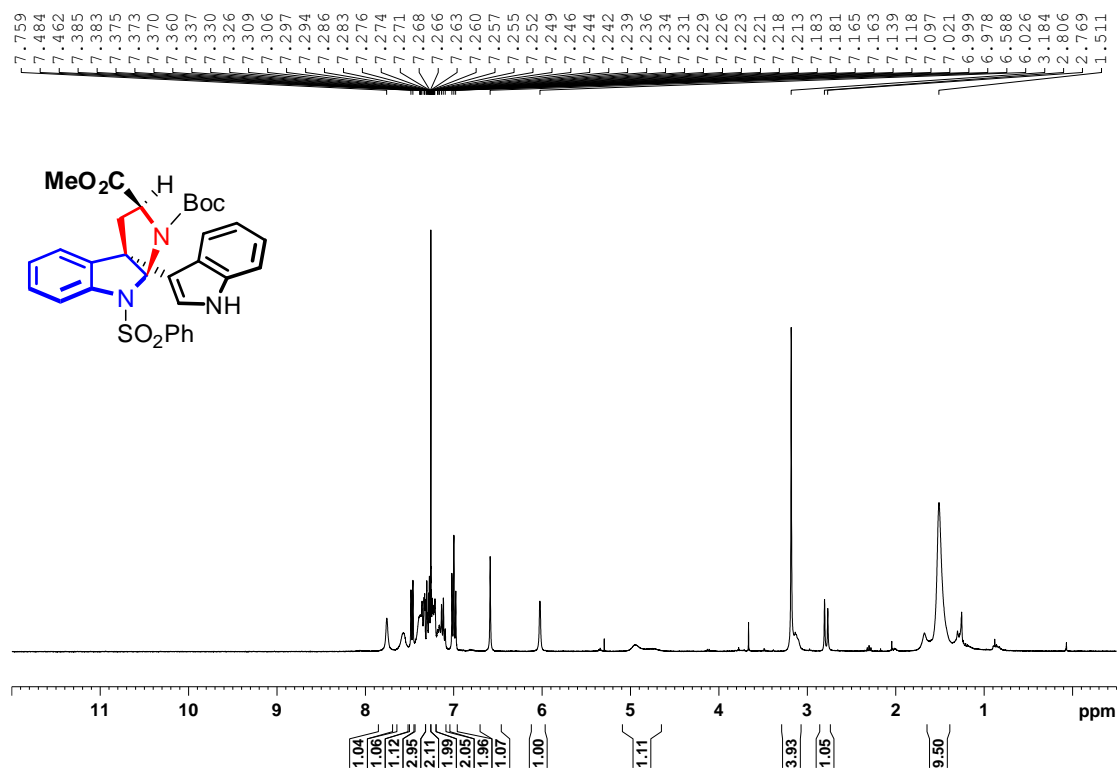

$^{13}\text{C}$  NMR ( $\text{CDCl}_3$ , 300K), **10**

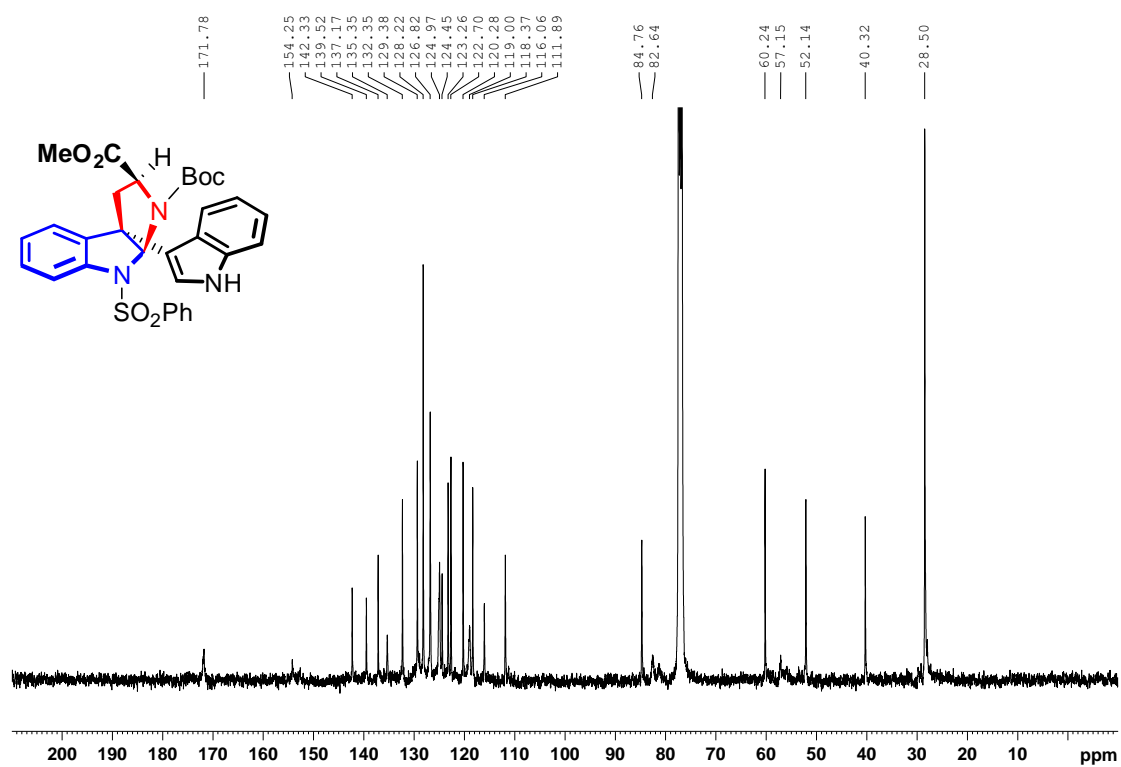

$^1\text{H}$  NMR ( $\text{CDCl}_3$ , 300K), **12**

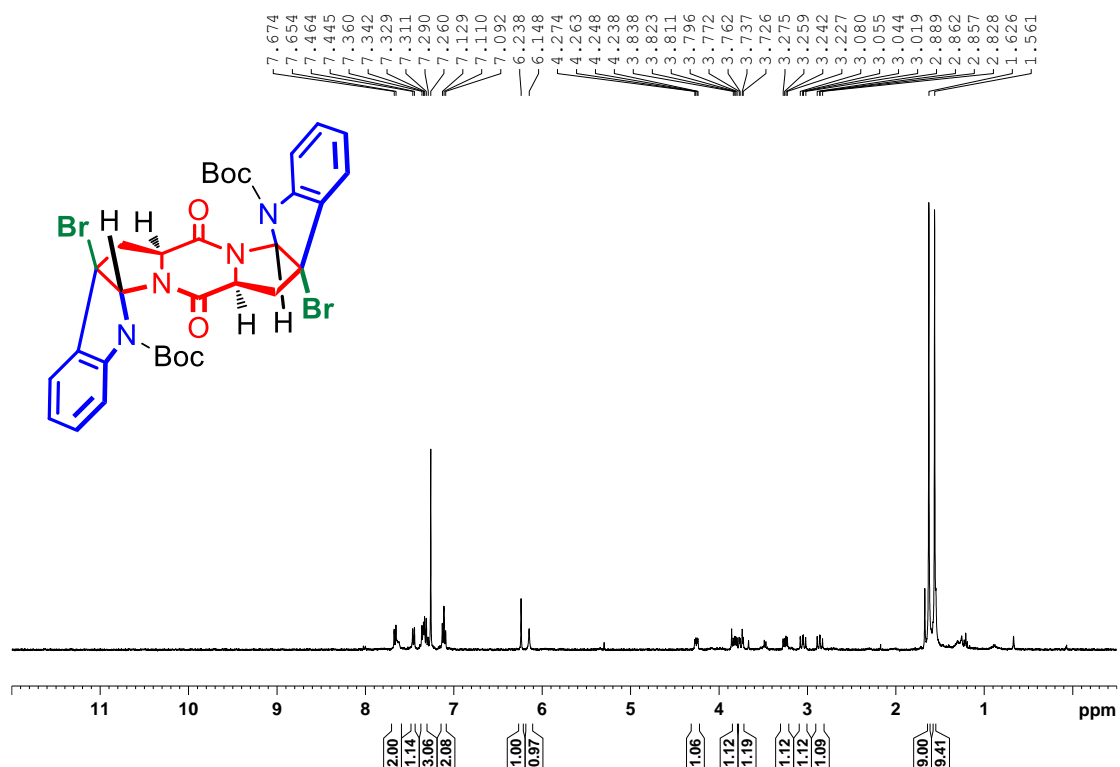

$^{13}\text{C}$  NMR ( $\text{CDCl}_3$ , 300K), **12**

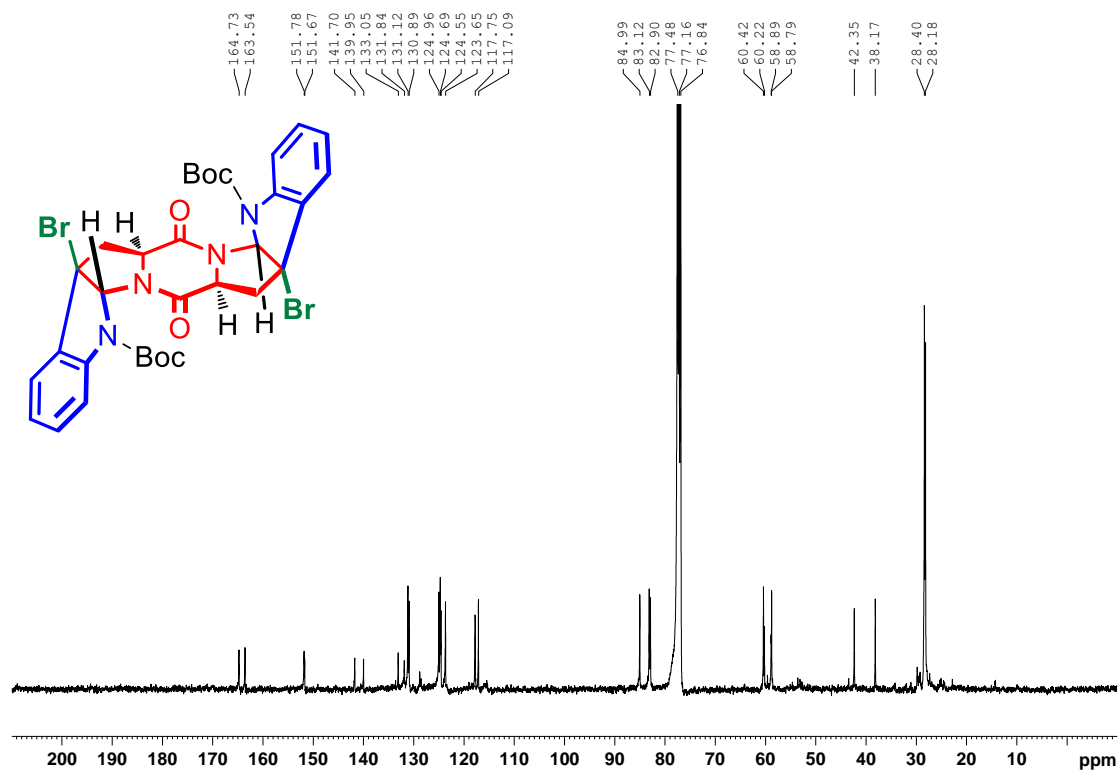

$^1\text{H}$  NMR ( $\text{CDCl}_3$ , 300K), **13**

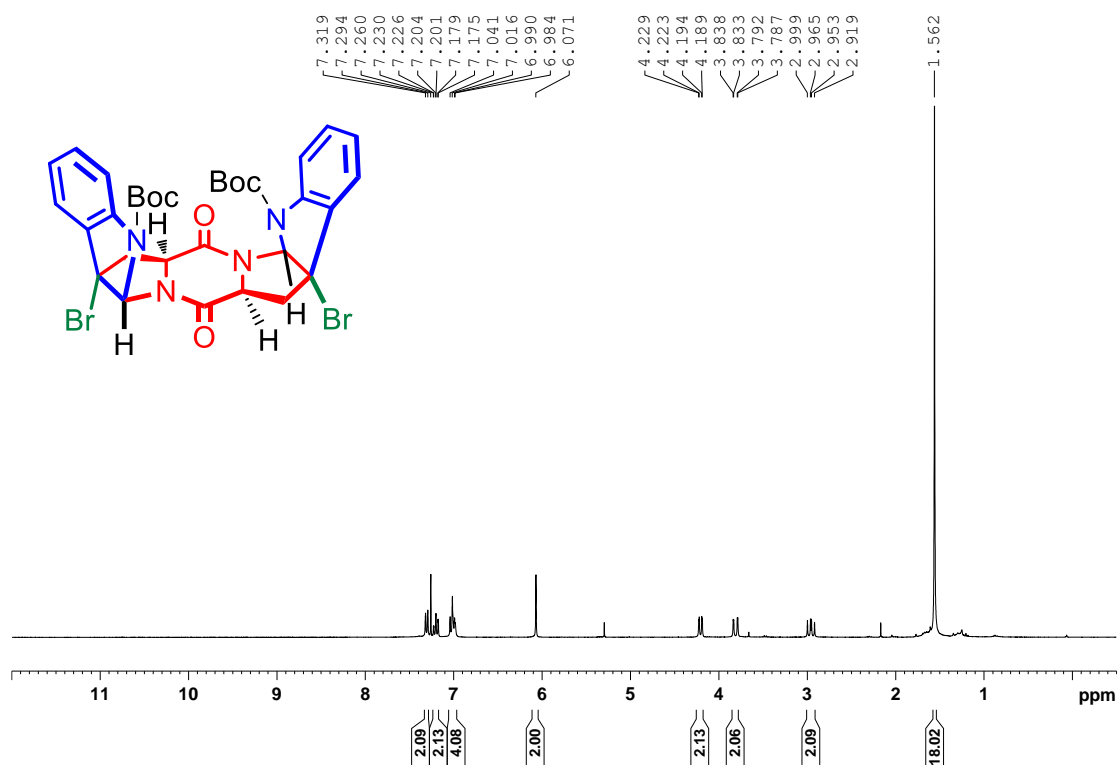

$^{13}\text{C}$  NMR ( $\text{CDCl}_3$ , 300K), **13**

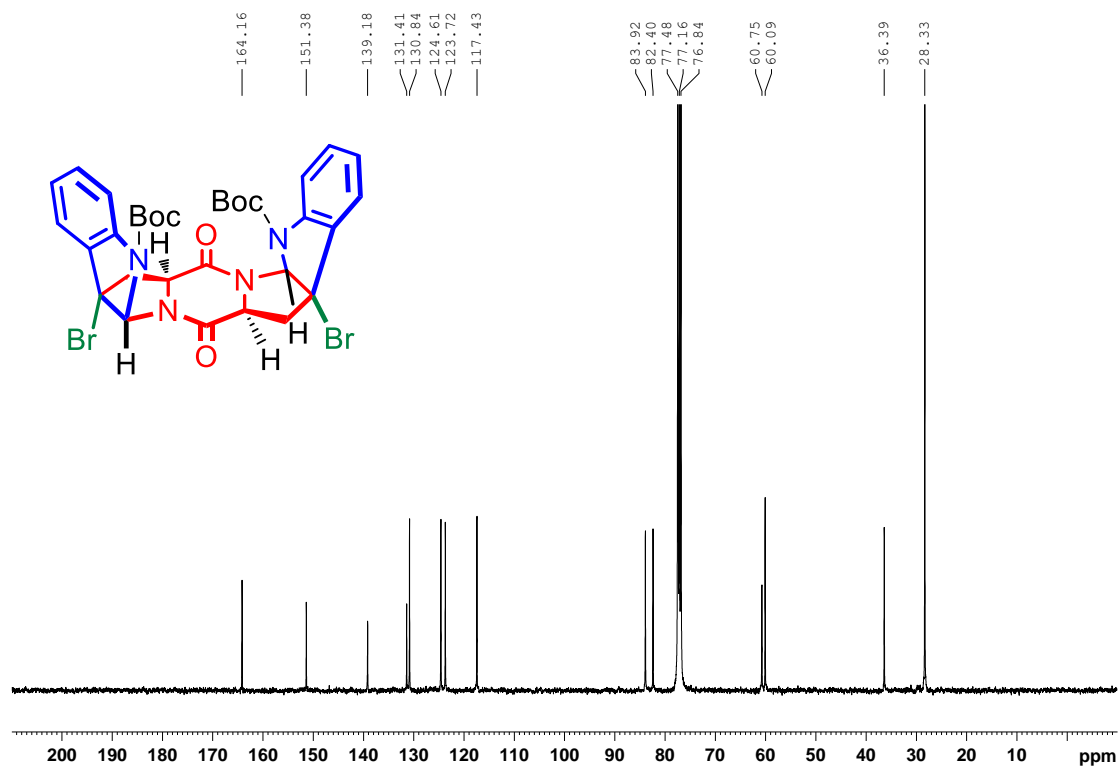

$^1\text{H}$  NMR ( $\text{CDCl}_3$ , 300K), **14** (1:1 mixture of diastereoisomers)

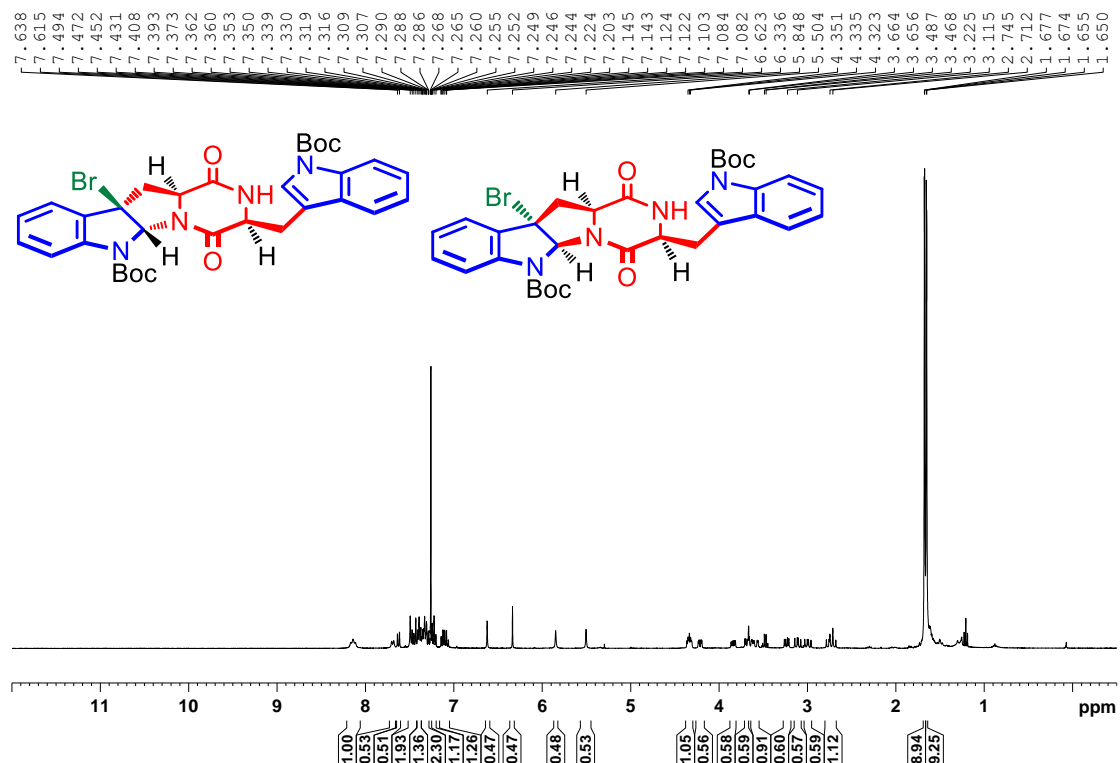

$^{13}\text{C}$  NMR ( $\text{CDCl}_3$ , 300K), **14** (1:1 mixture of diastereoisomers)

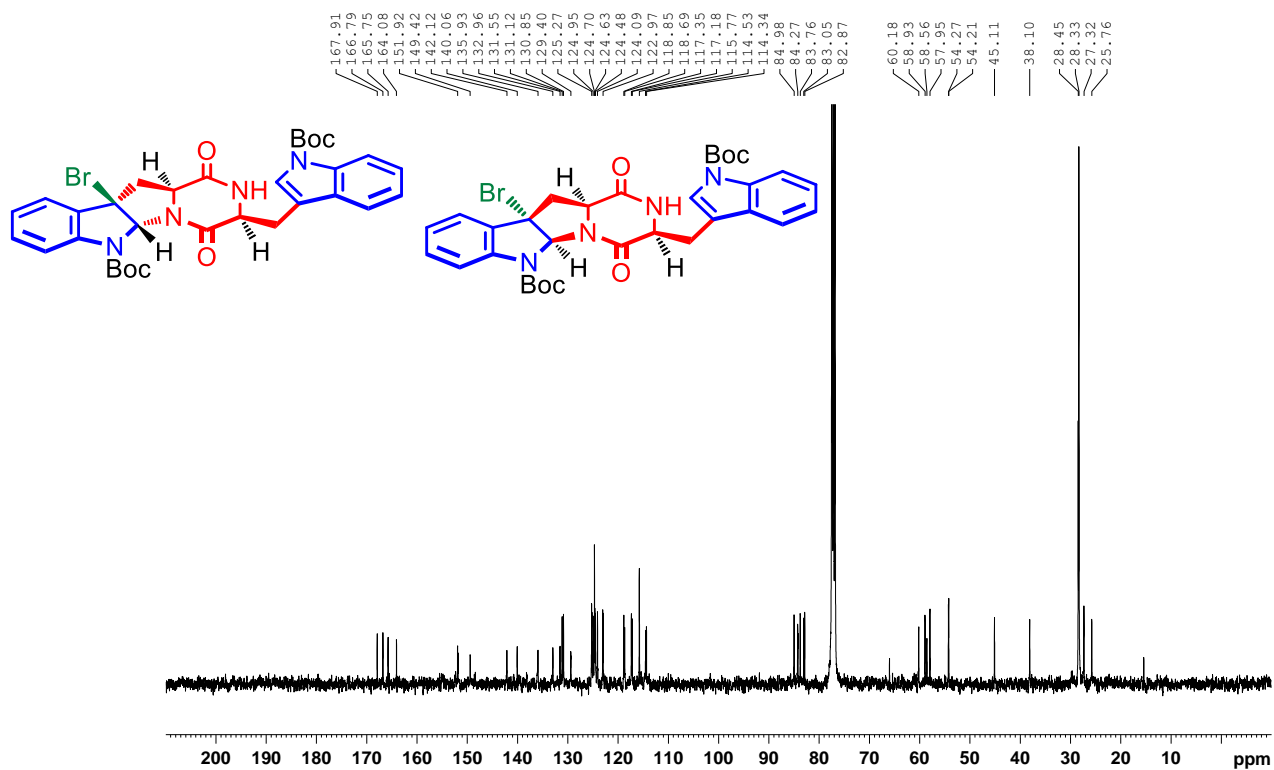

## 7. X-ray structure analysis

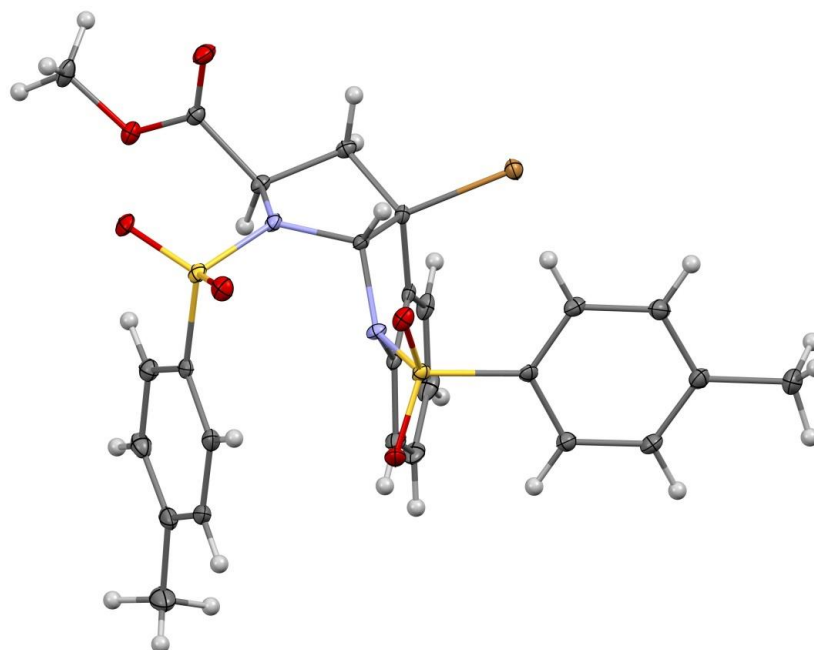

*Figure S3. ORTEP drawing of compound 8o. Thermal ellipsoids are shown at the 30% level.*

X-ray diffraction data for compound **8o** were collected by using a VENTURE PHOTON100 CMOS Bruker diffractometer with Micro-focus IuS source Cu K $\alpha$  radiation. Crystals were mounted on a CryoLoop (Hampton Research) with Paratone-N (Hampton Research) as cryoprotectant and then flashfrozen in a nitrogen-gas stream at 100 K. For compounds, the temperature of the crystal was maintained at the selected value by means of N-Helix cooling device to within an accuracy of  $\pm 1$  K. The data were corrected for Lorentz polarization, and absorption effects. The structure was solved by direct methods using SHELXS-97<sup>4</sup> and refined against  $F^2$  by full-matrix least-squares techniques using SHELXL-2018<sup>5</sup> with anisotropic displacement parameters for all non-hydrogen atoms. Hydrogen atoms were located on a difference Fourier map and introduced into the calculations as a riding model with isotropic thermal parameters. All calculations were performed by using the Crystal Structure crystallographic software package WINGX.<sup>6</sup>

The crystal data collection and refinement parameters are given in Table S2.

The crystallographic analysis revealed the absolute structure of **8o** with a Flack parameter<sup>7</sup> of in 0.027(6) the monoclinic  $P 2_1$  space group.

<sup>4</sup> Sheldrick, G. M. SHELXS-97, Program for Crystal Structure Solution, University of Göttingen, Göttingen, Germany, **1997**.

<sup>5</sup> Sheldrick, G. M. *Acta Crystallogr., Sect. A: Found. Crystallogr.*, **2008**, 64, 112-122.

<sup>6</sup> Farrugia, L. J. *J. Appl. Cryst.* **1999**, 32, 837.

<sup>7</sup> G. Bernardinelli and H. D. Flack, *Acta Crystallogr., Sect. A: Found. Crystallogr.*, **1985**, 41, 500-511.

CCDC 1910836 (**8o**) contains the supplementary crystallographic data for this paper. These data can be obtained free of charge from the Cambridge Crystallographic Data Centre via <http://www.ccdc.cam.ac.uk/Community/Requestastructure>.

**Table S2.** Crystallographic data and structure refinement details for compound **8o**.

|                                                                   |                                                                                 |
|-------------------------------------------------------------------|---------------------------------------------------------------------------------|
| Empirical Formula                                                 | C <sub>26</sub> H <sub>25</sub> Br N <sub>2</sub> O <sub>6</sub> S <sub>2</sub> |
| $M_r$                                                             | 605.51                                                                          |
| Crystal size, mm <sup>3</sup>                                     | 0.13 x 0.09 x 0.025                                                             |
| Crystal system                                                    | monoclinic                                                                      |
| Space group                                                       | $P 2_1$                                                                         |
| a, Å                                                              | 8.6142(9)                                                                       |
| b, Å                                                              | 15.2562(15)                                                                     |
| c, Å                                                              | 10.0113(10)                                                                     |
| $\alpha$ , °                                                      | 90                                                                              |
| $\beta$ , °                                                       | 93.761(4)                                                                       |
| $\gamma$ , °                                                      | 90                                                                              |
| Cell volume, Å <sup>3</sup>                                       | 1312.9(2)                                                                       |
| Z ; Z'                                                            | 2 ; 1                                                                           |
| T, K                                                              | 100 (1)                                                                         |
| Radiation type ;<br>wavelength Å                                  | CuK $\alpha$ ; 1.54178                                                          |
| F <sub>000</sub>                                                  | 620                                                                             |
| $\mu$ , mm <sup>-1</sup>                                          | 4.001                                                                           |
| $\theta$ range, °                                                 | 4.426 - 66.959                                                                  |
| Reflection collected                                              | 14 066                                                                          |
| Reflections unique                                                | 4 552                                                                           |
| R <sub>int</sub>                                                  | 0.0358                                                                          |
| GOF                                                               |                                                                                 |
| Refl. obs. ( $I > 2\sigma(I)$ )                                   | 4 467                                                                           |
| Parameters                                                        | 1.036                                                                           |
| wR <sub>2</sub> (all data)                                        | 0.0562                                                                          |
| R value ( $I > 2\sigma(I)$ )                                      | 0.0227                                                                          |
| Flack parameter                                                   | 0.027(6)                                                                        |
| Largest diff. peak and<br>hole (e <sup>-</sup> ·Å <sup>-3</sup> ) | 0.398 ; -0.235                                                                  |
